# Supplementary material for: Pd NPs decorated on crosslinked sodium alginate modified iron-based metal–organic framework Fe(BTC) as a green multifunctional catalyst for the oxidative amidation
Source: Royal Society of Chemistry journal article supplement (doi:10.1039/d4na00151f), 2024-01-01

## Supporting Information

### Pd NPs decorated on crosslinked sodium alginate modified Iron-based metal-organic framework Fe(BTC) as a green multifunctional catalyst for the oxidative amidation

Samaneh Koosha<sup>a</sup>, Ramin Ghorbani-Vaghei<sup>a\*</sup>, Sedigheh Alavinia<sup>a</sup>, Rahman Karimi-Nami<sup>b</sup>, Idris Karakaya<sup>c</sup>

<sup>a</sup>Department of Organic Chemistry, Faculty of Chemistry and Petroleum Sciences, Bu-Ali Sina University, 6517838683, Hamadan, Iran.

<sup>b</sup>Department of Chemistry, Faculty of Science, University of Maragheh, Maragheh, Iran.

<sup>c</sup>Department of Chemistry, College of Basic Sciences, Gebze Technical University, 41400 Gebze, Turkey.

Corresponding Author: [rgvaghei@yahoo.com](mailto:rgvaghei@yahoo.com) & [ghorbani@basu.ac.ir](mailto:ghorbani@basu.ac.ir)

#### General procedure for the one-pot synthesis of secondary amides

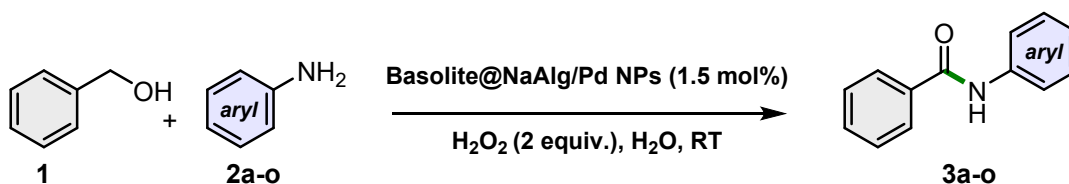

In a standard experimental procedure, the following components were combined in a 25 mL round-bottomed flask: 1.0 mmol of benzyl alcohol, 2.0 mmol of aqueous H<sub>2</sub>O<sub>2</sub> (30%), and 1.5 mol% of basolite@SA/ED /Pd NP catalyst in 3 mL of H<sub>2</sub>O. The mixture was then stirred at room temperature for 2 hours. After this initial reaction period, 1.0 mmol of aniline was introduced into the reaction mixture. Upon completion of the reaction, the catalyst was separated by centrifugation, and the organic residue was subsequently extracted with ethyl acetate. The solvent was then removed under reduced pressure. Finally, the resulting product was subjected to purification through column chromatography.

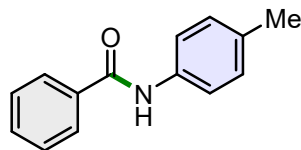

**3b**

***N*-(*p*-tolyl)benzamide (3b):**  $^1\text{H}$  NMR (500 MHz,  $\text{DMSO-}d_6$ , TMS)  $\delta$  7.94 (s, 1H), 7.84 (d,  $J$  = 7.5 Hz, 2H), 7.55 – 7.48 (m, 3H), 7.44 (t,  $J$  = 7.6 Hz, 2H), 7.14 (d,  $J$  = 8.2 Hz, 2H), 2.33 (s, 3H).  $^{13}\text{C}$  NMR (126 MHz,  $\text{DMSO-}d_6$ , TMS)  $\delta$  166.03, 135.54, 135.45, 135.03, 134.22, 131.68, 130.16, 129.53, 129.39, 128.66, 128.45, 127.14, 120.60, 21.08. FTIR ( $\text{cm}^{-1}$ ) 3310.34 (NH), 1646.90 (C=O).

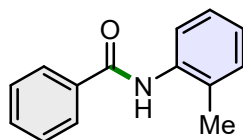

**3c**

***N*-(*o*-tolyl)benzamide (3c):**  $^1\text{H}$  NMR (500 MHz,  $\text{CDCl}_3$ , TMS)  $\delta$  8.00 – 7.84 (m, 3H), 7.76 (s, 1H), 7.55 (dd,  $J$  = 28.5, 5.7 Hz, 3H), 7.32 – 7.21 (m, 2H), 7.15 (d,  $J$  = 6.1 Hz, 1H),  $^1\text{H}$  NMR (500 MHz,  $\text{CDCl}_3$ )  $\delta$  7.94 (s, 1H), 7.84 (d,  $J$  = 7.5 Hz, 2H), 7.56 – 7.48 (m, 3H), 7.44 (t,  $J$  = 7.6 Hz, 2H), 7.14 (d,  $J$  = 8.2 Hz, 2H), 2.36 (s, 3H);  $^{13}\text{C}$  NMR (126 MHz,  $\text{CDCl}_3$ , TMS)  $\delta$  165.83, 135.79, 134.97, 131.85, 130.50, 129.67, 128.95, 128.83, 128.41, 127.13, 126.87, 125.49, 123.44, 17.87; FTIR ( $\text{cm}^{-1}$ ) 3246.88 (NH), 1649.86 (C=O).

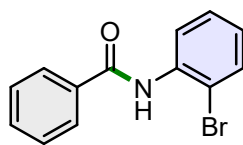

**3g**

***N*-(2-bromophenyl)benzamide (3g):**  $^1\text{H}$  NMR (500 MHz,  $\text{CDCl}_3$ , TMS)  $\delta$  8.56 (d,  $J$  = 8.1 Hz, 1H), 8.47 (s, 1H), 7.94 (d,  $J$  = 7.5 Hz, 2H), 7.55 (dd,  $J$  = 24.2, 7.4 Hz, 4H), 7.38 (t,  $J$  = 7.7 Hz, 1H), 7.02 (t,  $J$  = 7.6 Hz, 1H); FTIR ( $\text{cm}^{-1}$ ) 3219.29 (NH), 1651.60 (C=O).

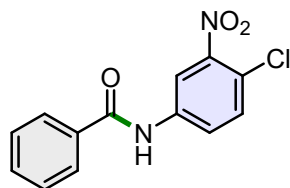

**3k**

***N*-(4-chloro-3-nitrophenyl)benzamide (3k):**  $^1\text{H}$  NMR (500 MHz,  $\text{CDCl}_3$ )  $\delta$  13.98 (s, 1H), 8.31 (s, 1H), 8.07 (s, 1H), 7.98 – 7.75 (m, 3H), 7.57 (dd,  $J = 29.3, 10.4$  Hz, 3H);  $^{13}\text{C}$  NMR (126 MHz,  $\text{DMSO-}d_6$ , TMS)  $\delta$  165.89, 147.96, 137.58, 133.69, 132.65, 132.28, 129.06, 127.12, 124.29, 121.85, 116.80; FTIR ( $\text{cm}^{-1}$ ) 3406.99 (NH), 1683.95 (C=O).

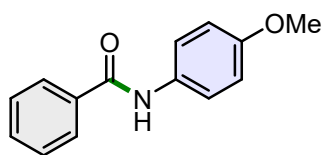

**3d**

***N*-(4-methoxyphenyl)benzamide (3d):**  $^1\text{H}$  NMR (500 MHz,  $\text{CDCl}_3$ , TMS)  $\delta$  8.12 (s, 1H), 7.85 (s, 2H), 7.53 (d,  $J = 0.8$  Hz, 2H), 7.42 (d,  $J = 28.3$  Hz, 3H), 6.82 (d,  $J = 4.1$  Hz, 2H), 3.74 (s, 3H);  $^{13}\text{C}$  NMR (126 MHz,  $\text{CDCl}_3$ , TMS)  $\delta$  165.71, 156.54, 135.00, 131.64, 131.22, 128.67, 127.18, 122.25, 114.16, 55.34; FTIR ( $\text{cm}^{-1}$ ) 3330.69 (NH), 1646.99 (C=O).

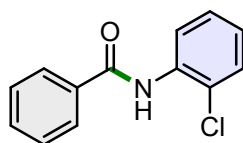

**3h**

***N*-(2-chlorophenyl)benzamide (3h):**  $^1\text{H}$  NMR (500 MHz,  $\text{CDCl}_3$ , TMS)  $\delta$  8.45 (d,  $J = 8.2$  Hz, 1H), 8.36 (s, 1H), 7.82 (d,  $J = 7.5$  Hz, 2H), 7.44 (dt,  $J = 15.0, 7.3$  Hz, 3H), 7.30 (d,  $J = 8.0$  Hz, 1H), 7.22 (t,  $J = 7.8$  Hz, 1H), 6.97 (t,  $J = 7.7$  Hz, 1H); FTIR ( $\text{cm}^{-1}$ ) 3226.77 (NH), 1653.24 (C=O).

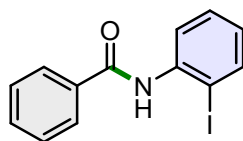

**3f**

***N*-(2-iodophenyl)benzamide (3f):**  $^1\text{H}$  NMR (500 MHz,  $\text{CDCl}_3$ )  $\delta$  8.37 (d,  $J = 7.5$  Hz, 1H), 8.22 (s, 1H), 7.89 (d,  $J = 7.4$  Hz, 2H), 7.73 (d,  $J = 7.9$  Hz, 1H), 7.50 (t,  $J = 7.4$  Hz, 1H), 7.44 (t,  $J = 7.5$  Hz, 2H), 7.32 (t,  $J = 7.7$  Hz, 1H), 6.80 (t,  $J = 7.6$  Hz, 1H);  $^{13}\text{C}$  NMR (126 MHz,  $\text{CDCl}_3$ , TMS)  $\delta$

165.38, 138.87, 138.31, 134.48, 132.03, 129.42, 128.99, 127.25, 126.18, 122.05, 90.63; FTIR ( $\text{cm}^{-1}$ ) 3215.80 (NH), 1649.33 (C=O).

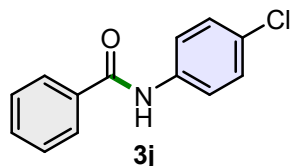

***N*-(4-chlorophenyl)benzamide (3j):**  $^1\text{H}$  NMR (500 MHz,  $\text{CDCl}_3$ , TMS)  $\delta$  7.79 (s, 2H), 7.51 (d,  $J = 20.1$  Hz, 1H), 7.43 (m, 3H), 7.27 (d,  $J = 3.7$  Hz, 3H), 7.19 (s, 1H); FTIR ( $\text{cm}^{-1}$ ) 3349.44 (NH), 1654.64 (C=O).

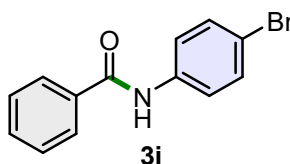

***N*-(4-bromophenyl)benzamide (3i):**  $^1\text{H}$  NMR (500 MHz,  $\text{CDCl}_3$ , TMS)  $\delta$  7.79 (d,  $J = 7.5$  Hz, 2H), 7.75 (s, 1H), 7.54 – 7.46 (m, 2H), 7.42 (t,  $J = 9.1$  Hz, 3H), 7.19 (s, 1H);  $^{13}\text{C}$  NMR (126 MHz,  $\text{DMSO-}d_6$ , TMS)  $\delta$  164.62, 135.99, 133.61, 131.06, 130.88, 127.86, 125.98, 125.83, 120.68; FTIR ( $\text{cm}^{-1}$ ) 3333.19 (NH), 1648.04 (C=O).

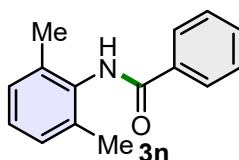

***N*-(2,6-dimethylphenyl)benzamide (3n):**  $^1\text{H}$  NMR (500 MHz,  $\text{CDCl}_3$ , TMS)  $\delta$  7.82 (d,  $J = 7.4$  Hz, 2H), 7.47 (t,  $J = 7.3$  Hz, 2H), 7.39 (t,  $J = 7.6$  Hz, 2H), 7.06 (dd,  $J = 8.9, 5.6$  Hz, 1H), 7.03 – 7.01 (m, 2H), 2.18 (s, 6H);  $^{13}\text{C}$  NMR (126 MHz,  $\text{CDCl}_3$ , TMS)  $\delta$  165.98, 135.60, 134.45, 133.91, 131.76, 128.72, 128.25, 127.40, 127.24, 18.45; FTIR ( $\text{cm}^{-1}$ ) 3274.83 (NH), 1644.05 (C=O).

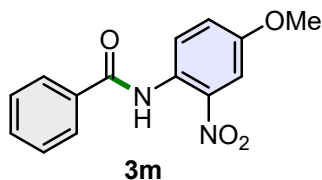

***N*-(4-chloro-3-nitrophenyl)benzamide (3m):**  $^1\text{H}$  NMR (500 MHz,  $\text{CDCl}_3$ , TMS)  $\delta$  11.01 (s, 1H), 8.81 (d,  $J = 9.3$  Hz, 1H), 7.90 (d,  $J = 7.5$  Hz, 2H), 7.64 (d,  $J = 2.6$  Hz, 1H), 7.51 (t,  $J = 7.2$  Hz,

1H), 7.45 (t,  $J = 7.5$  Hz, 2H), 7.21 (dd,  $J = 13.9, 7.3$  Hz, 1H), 3.80 (s, 3H);  $^{13}\text{C}$  NMR(126 MHz,  $\text{CDCl}_3$ , TMS)  $\delta$  165.54, 155.02, 137.07, 134.16, 132.48, 129.05, 129.01, 127.29, 123.68, 108.69, 17.93; FTIR ( $\text{cm}^{-1}$ ) 3335.72 (NH), 1679.45 (C=O).

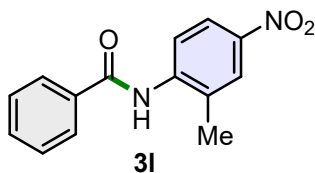

***N*-(2-methyl-4-nitrophenyl)benzamide (31):**  $^1\text{H}$  NMR (500 MHz,  $\text{CDCl}_3$ , TMS)  $\delta$  8.40 (d,  $J = 8.9$  Hz, 1H), 8.07 (dd,  $J = 13.8, 4.8$  Hz, 2H), 7.82 (d,  $J = 7.4$  Hz, 2H), 7.54 (t,  $J = 7.4$  Hz, 1H), 7.46 (t,  $J = 7.6$  Hz, 2H), 2.39 (s, 3H);  $^{13}\text{C}$  NMR (126 MHz,  $\text{CDCl}_3$ , TMS)  $\delta$  165.51, 143.61, 134.21, 132.65, 129.15, 128.78, 127.09, 125.73, 123.03, 120.97, 113.14, 17.90; FTIR ( $\text{cm}^{-1}$ ) 3309.58 (NH), 1651.80 (C=O).

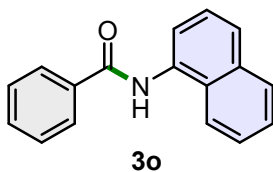

***N*-(naphthalen-1-yl)benzamide (30):**  $^1\text{H}$  NMR (500 MHz,  $\text{CDCl}_3$ , TMS)  $\delta$  8.20 (s, 1H), 7.88 (d,  $J = 7.2$  Hz, 3H), 7.84 – 7.77 (m, 2H), 7.65 (d,  $J = 8.2$  Hz, 1H), 7.49 (t,  $J = 7.3$  Hz, 1H), 7.46 – 7.36 (m, 4H), 7.17 (s, 1H);  $^{13}\text{C}$  NMR (126 MHz,  $\text{CDCl}_3$ , TMS)  $\delta$  166.34, 134.85, 134.19, 131.97, 128.88, 128.85, 127.24, 126.43, 126.17, 126.08, 125.79, 121.38, 120.79; FTIR ( $\text{cm}^{-1}$ ) 3235.26 (NH), 1647.10 (C=O).

## Spectral Data

$^1\text{H}$  NMR,  $^{13}\text{C}$  NMR, mass and IR spectrum of *N*-(*o*-tolyl)benzamide (3b)

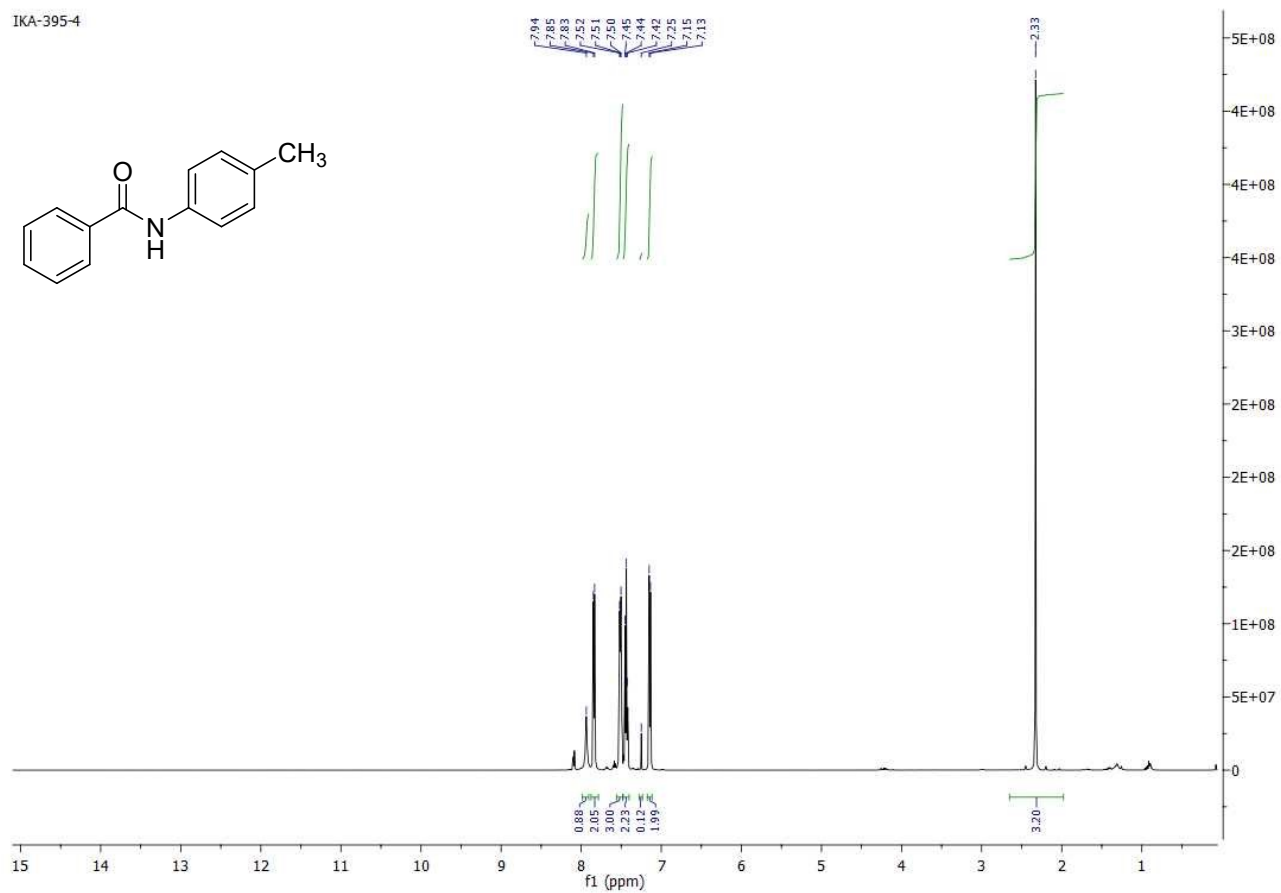

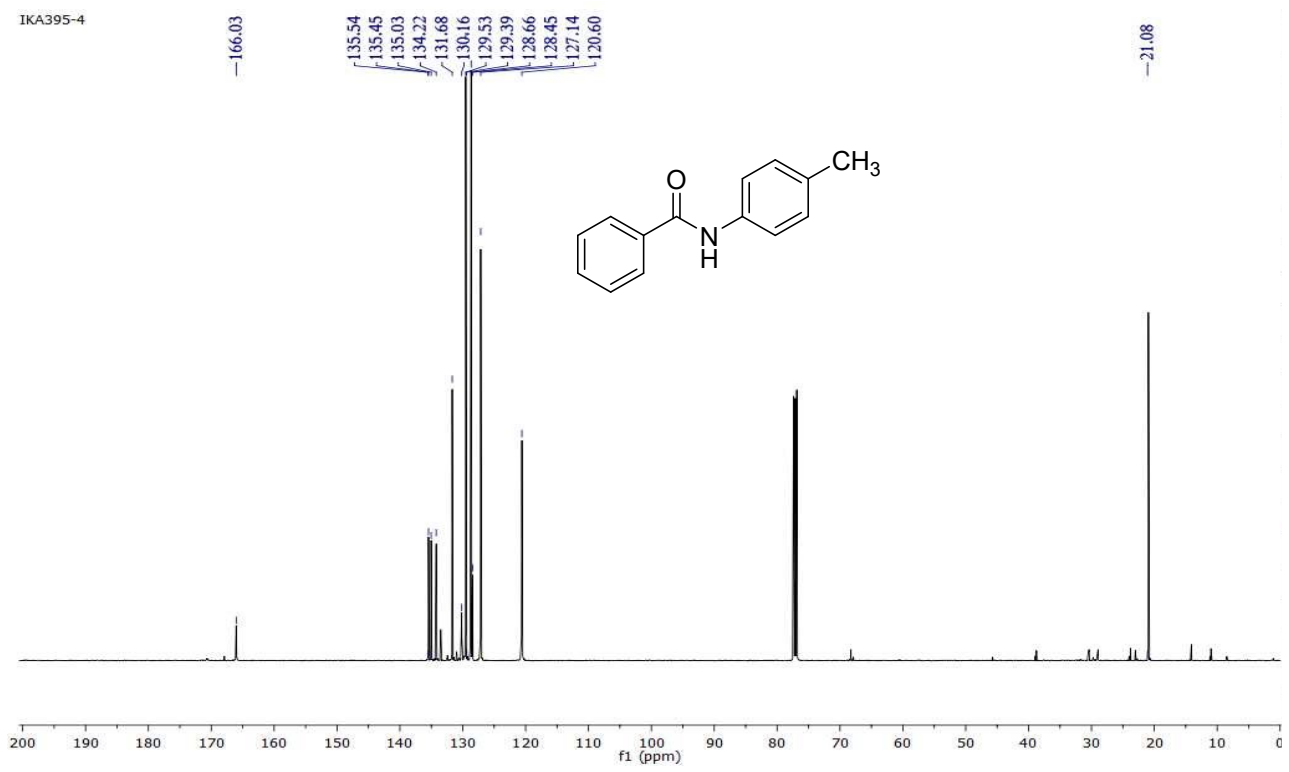

Abundance

Scan 1497 (9.907 min): IKA4 2.D\data.ms

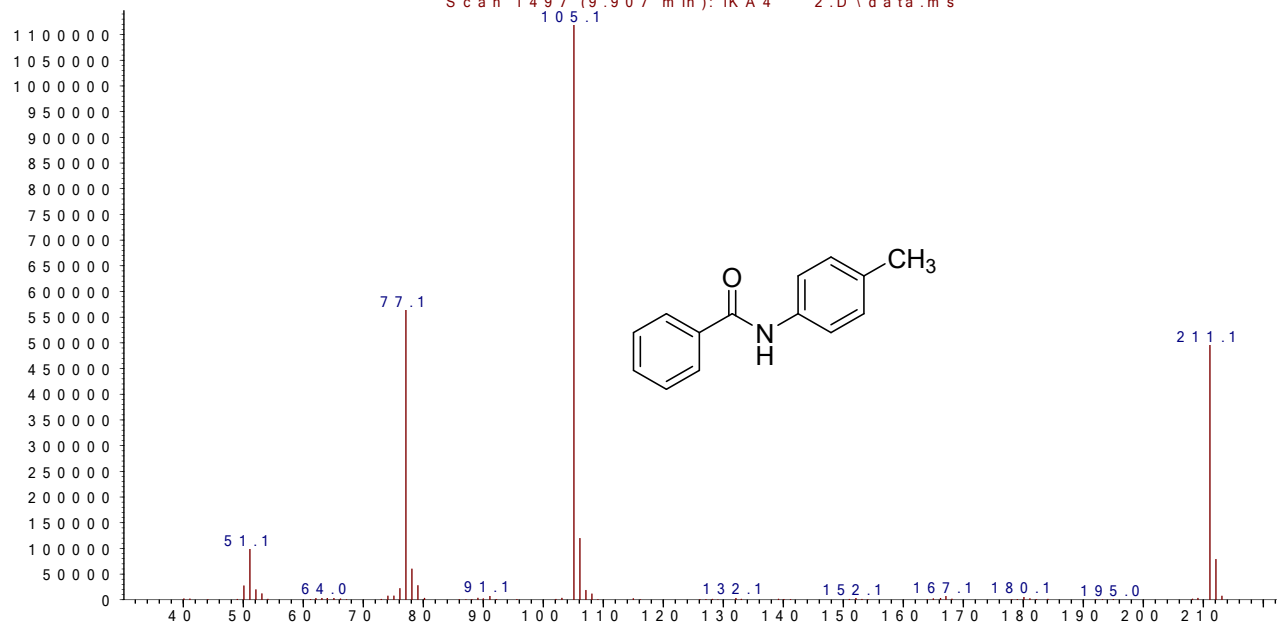

m/z-->



Abundance

Scan 1497 (9.907 min): IKA4 2.D\data.ms

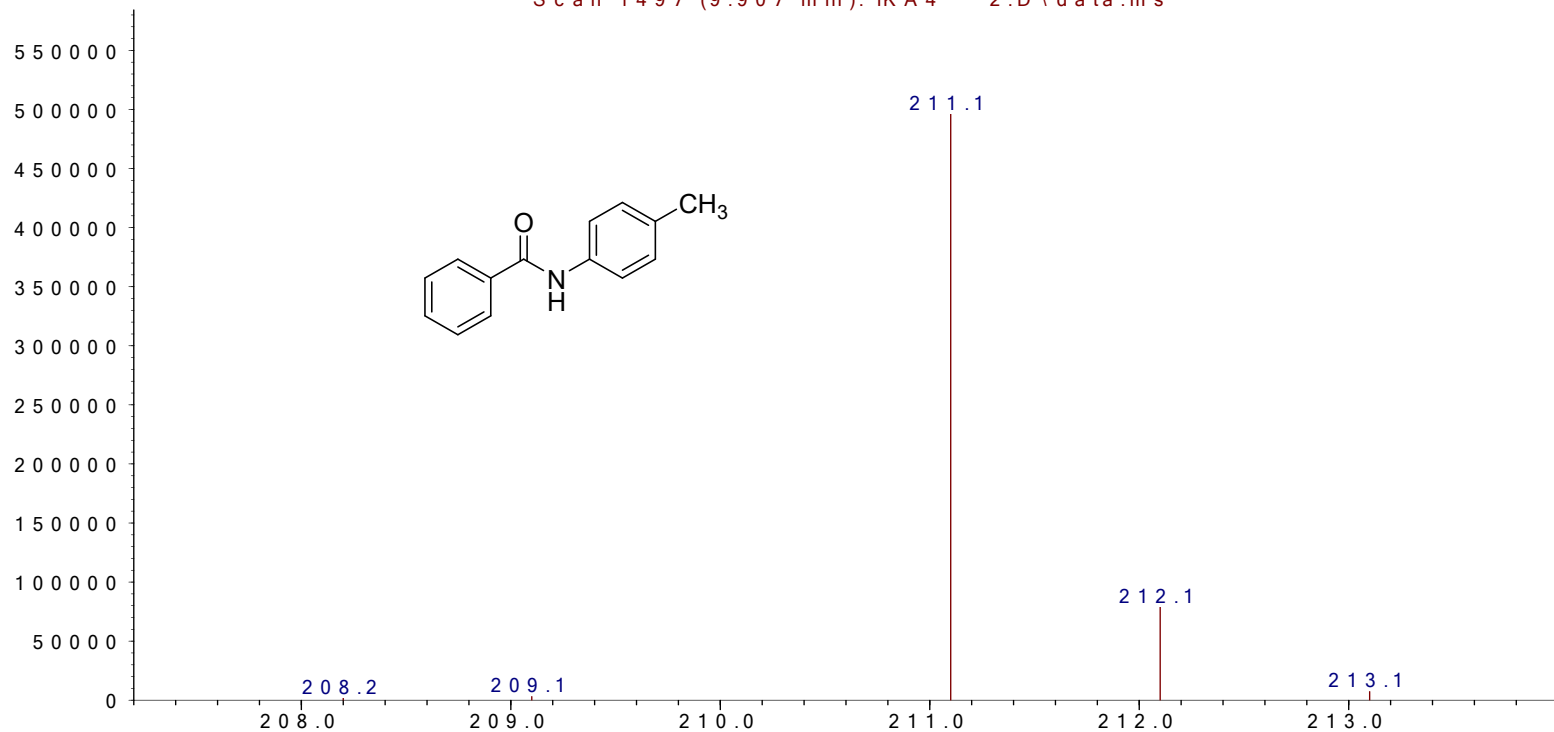

m / z-->

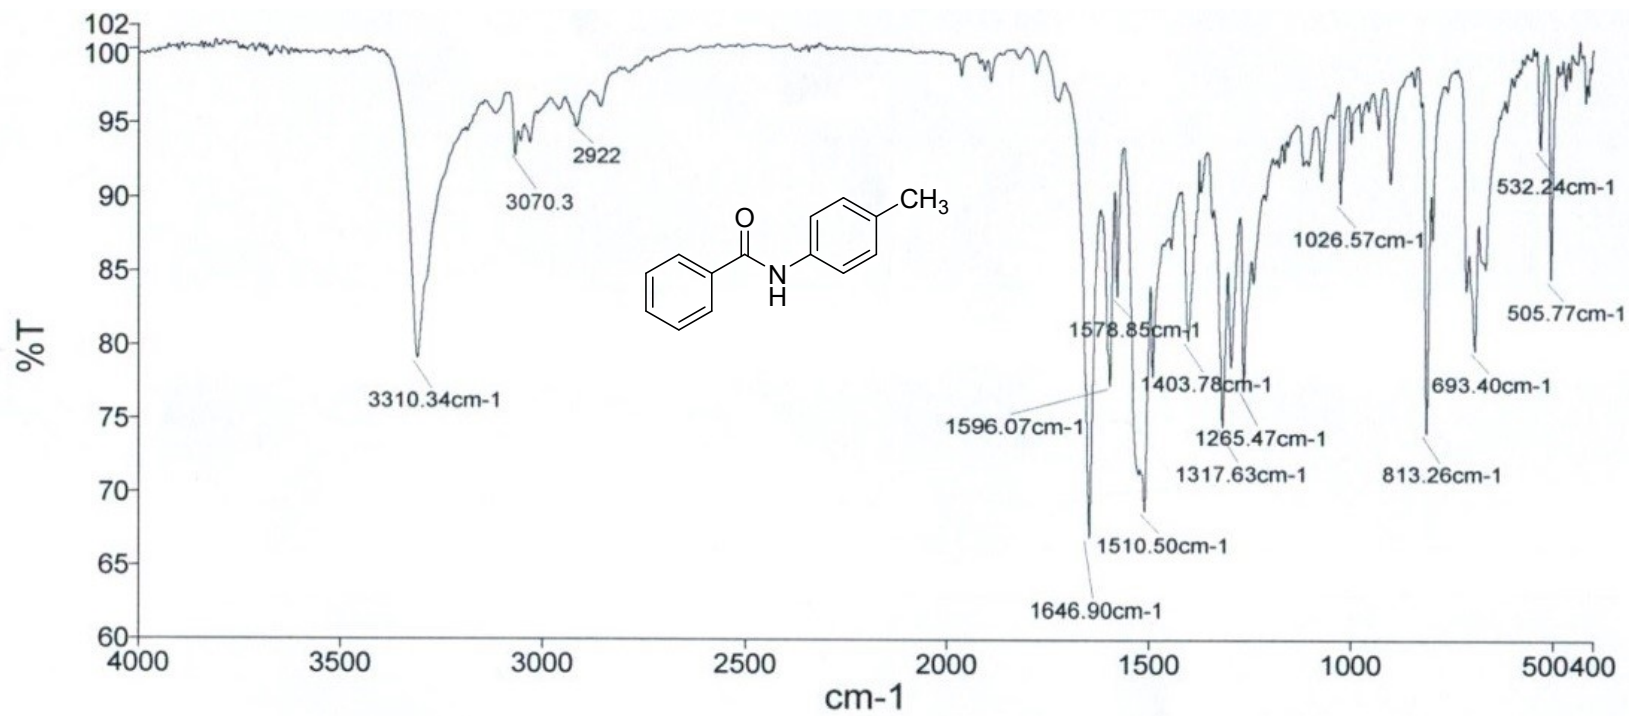

$^1\text{H}$  NMR,  $^{13}\text{C}$  NMR, mass and IR spectrum of *N*-(*o*-tolyl)benzamide (3c)

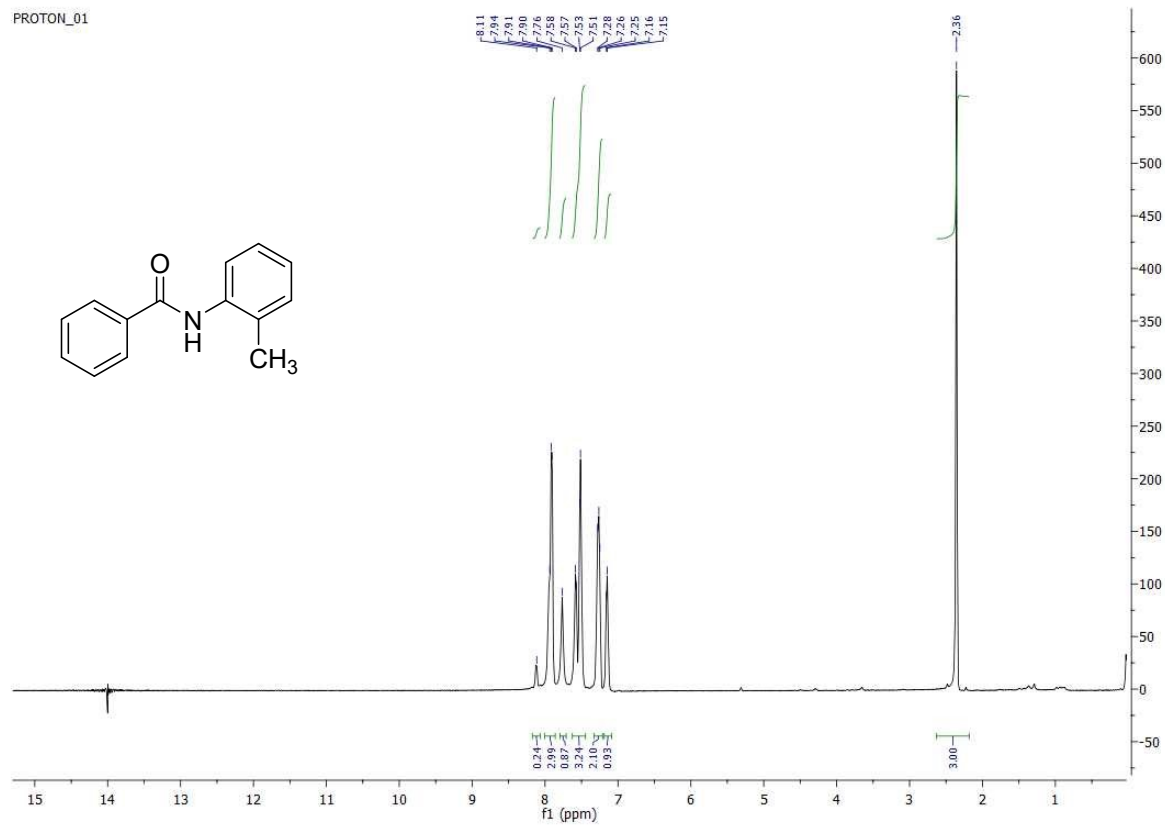

IKA395-1

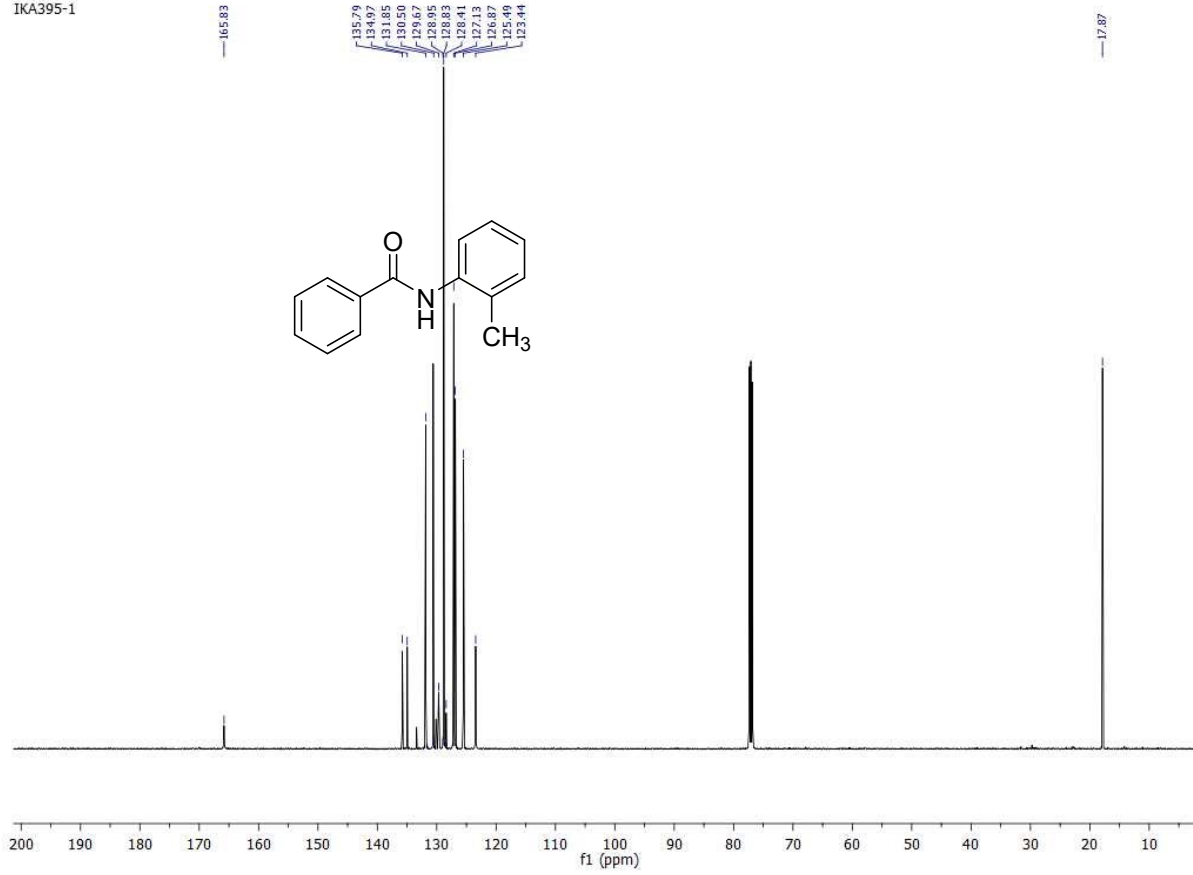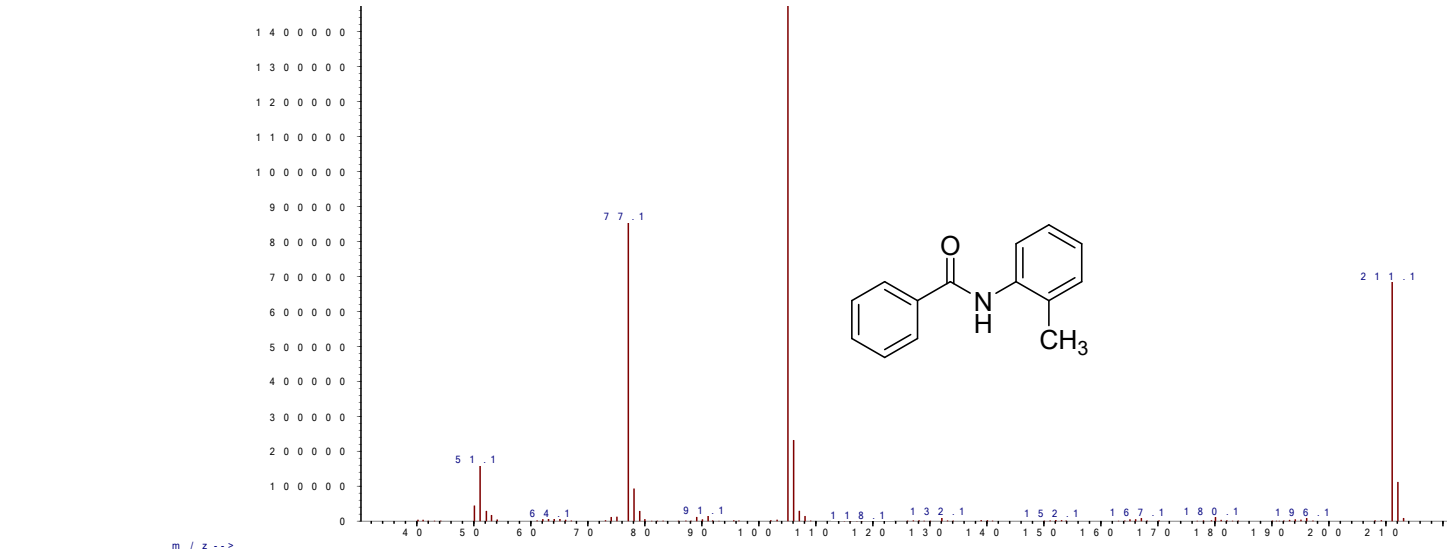



Abundance

Scan 1322 (9.491 min): IKA1 2.D\data.ms

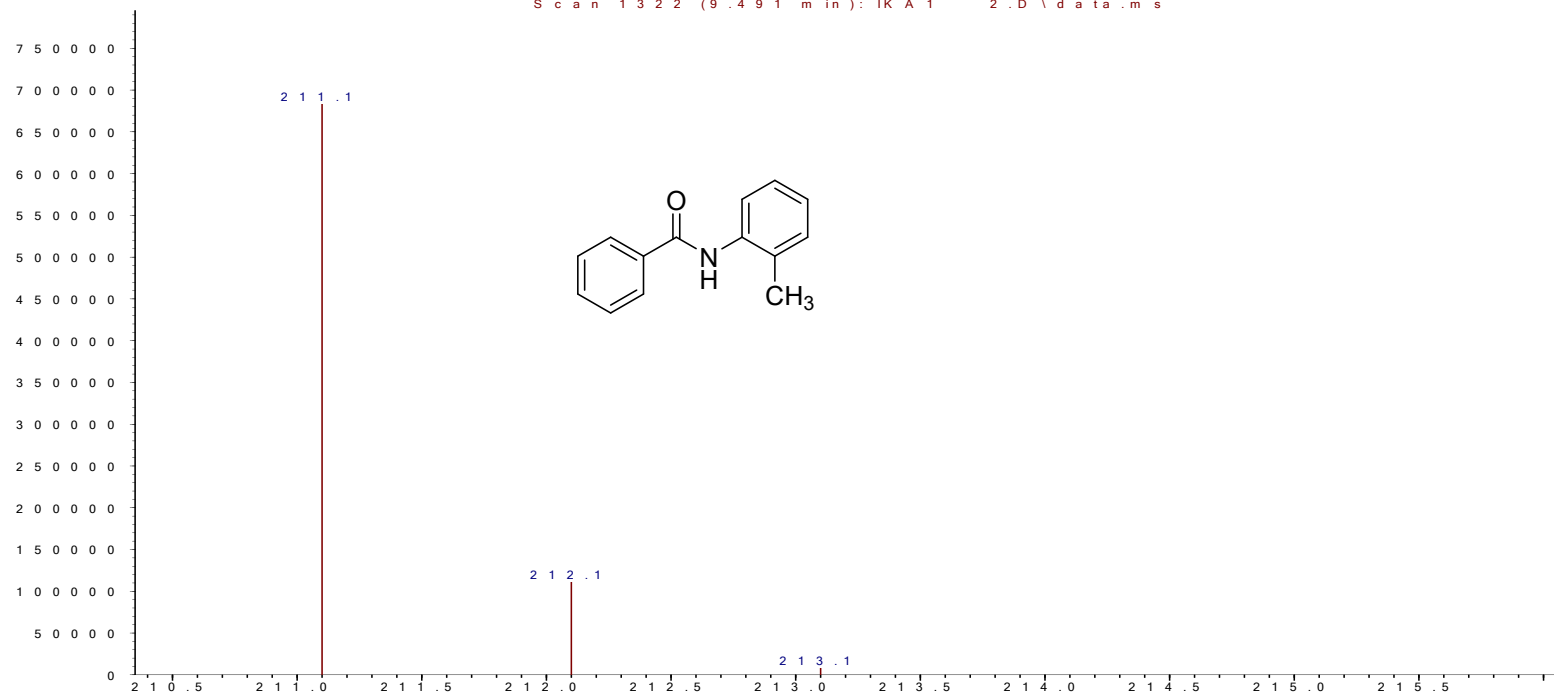

m / z-->

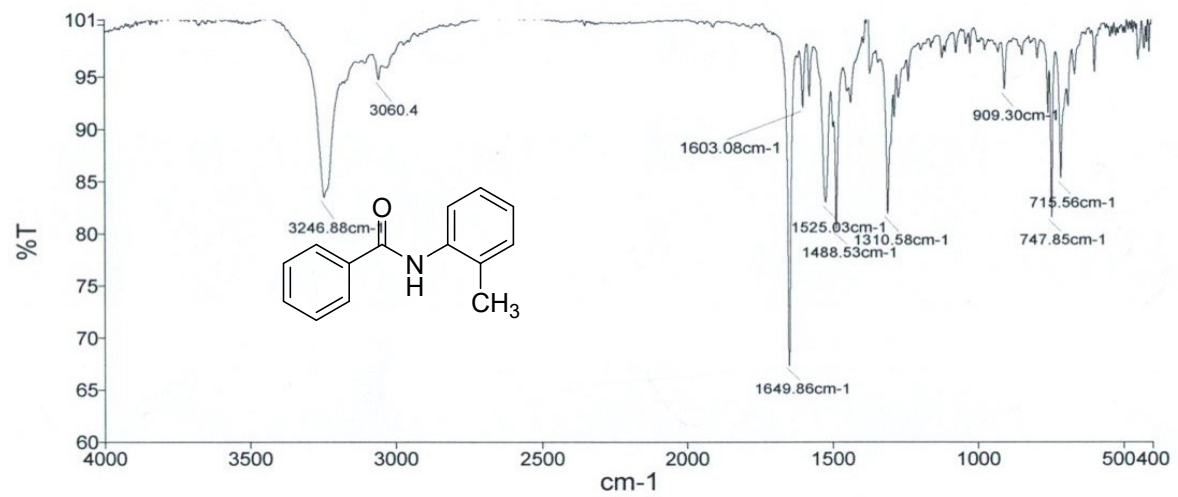

<sup>1</sup>H NMR, mass and IR spectrum of *N*-(2-bromophenyl)benzamide (3g)

IKA-395-2

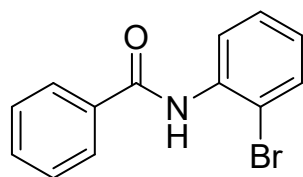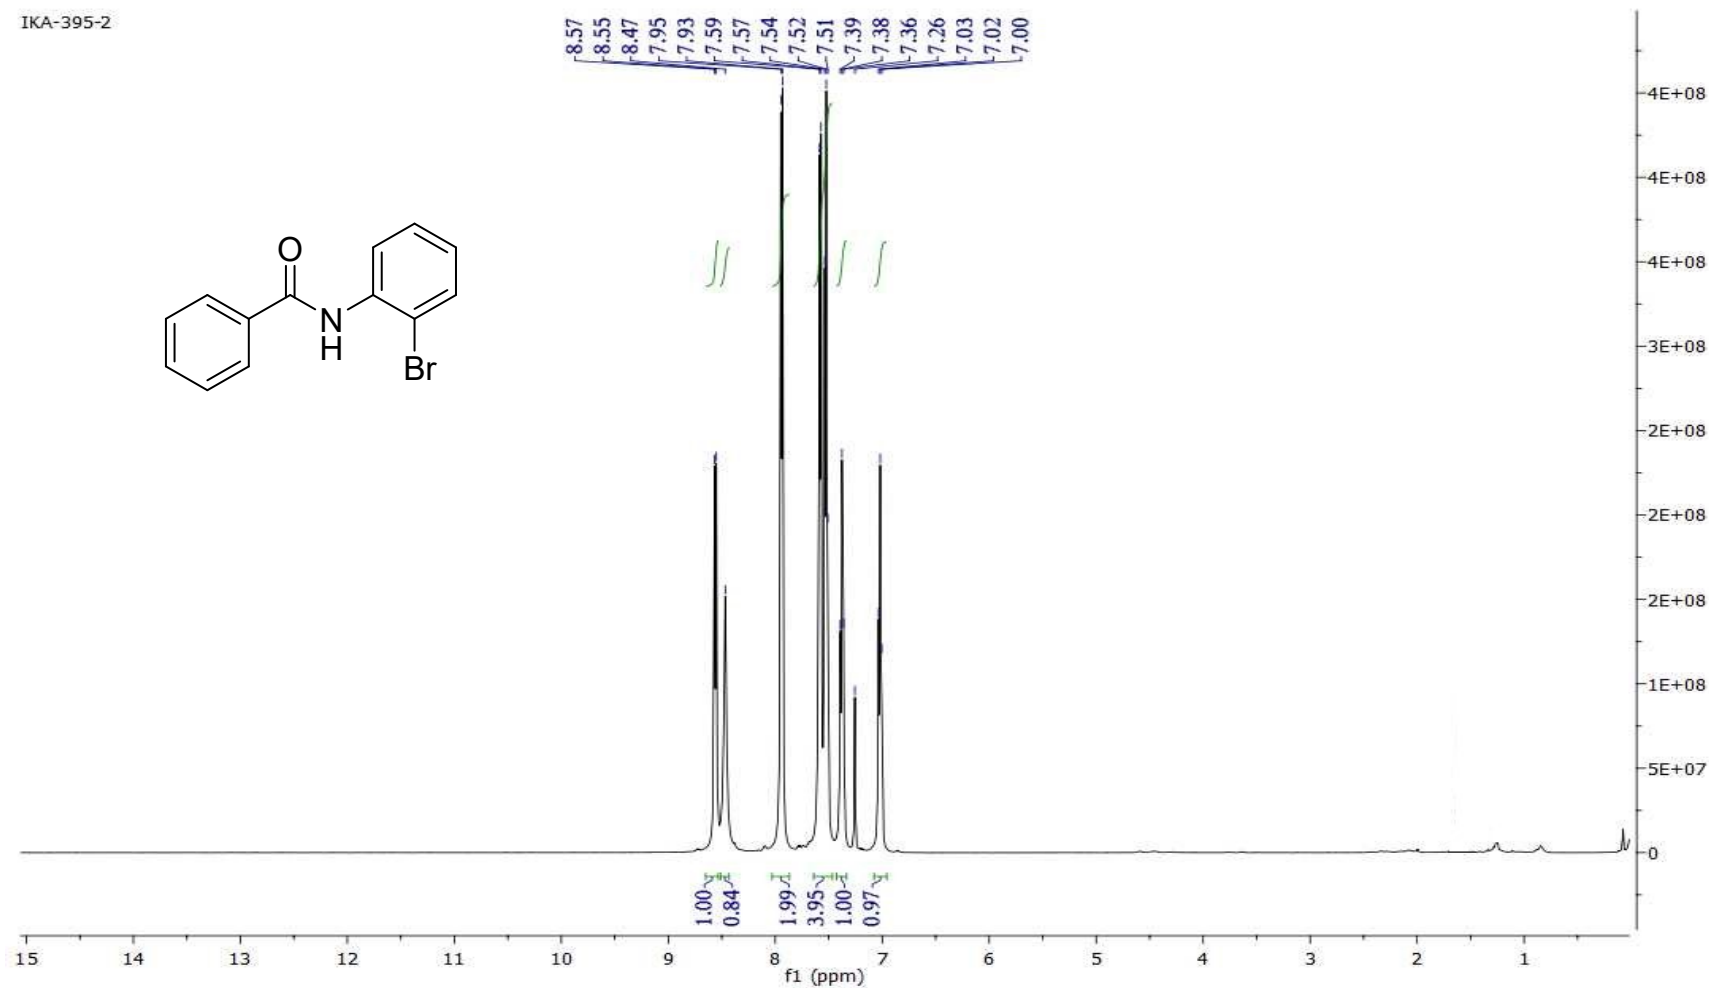



Abundance

Scan 1405 (10.019 min): IKA2 2.D\data.ms  
105.1

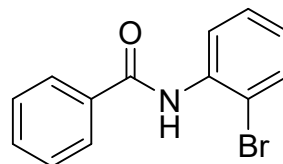

m/z-->

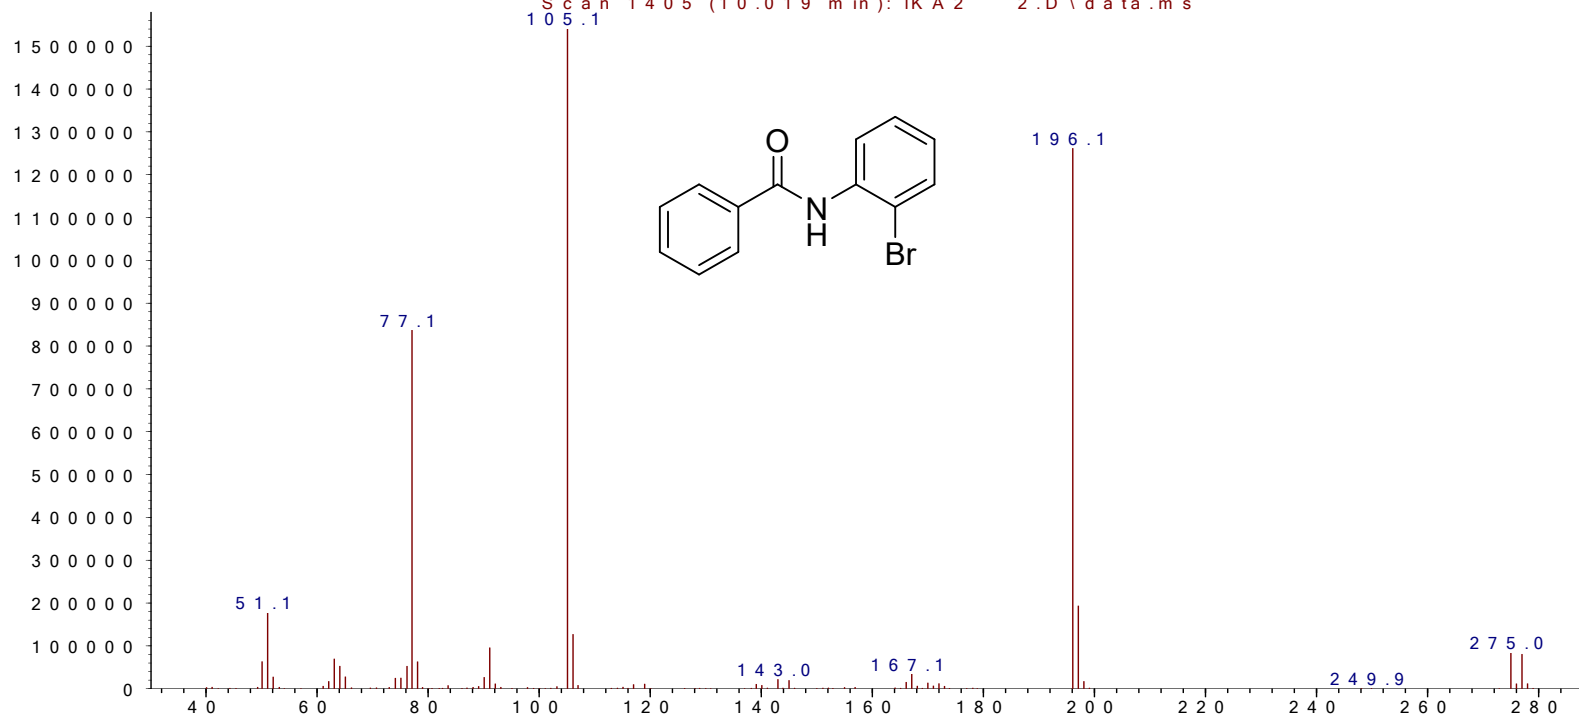

Abundance

Scan 1405 (10.019 min): IKA2 2.D\data.ms

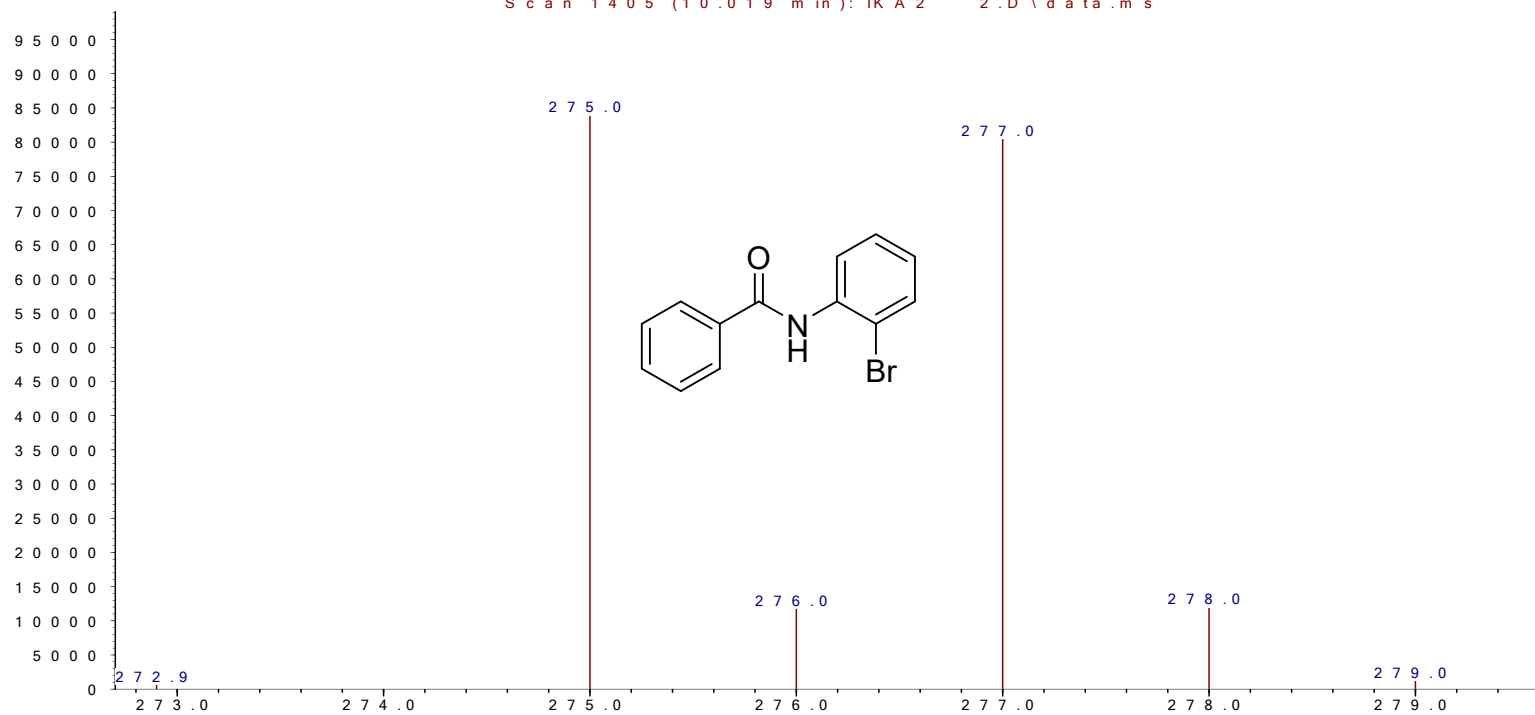

m/z-->

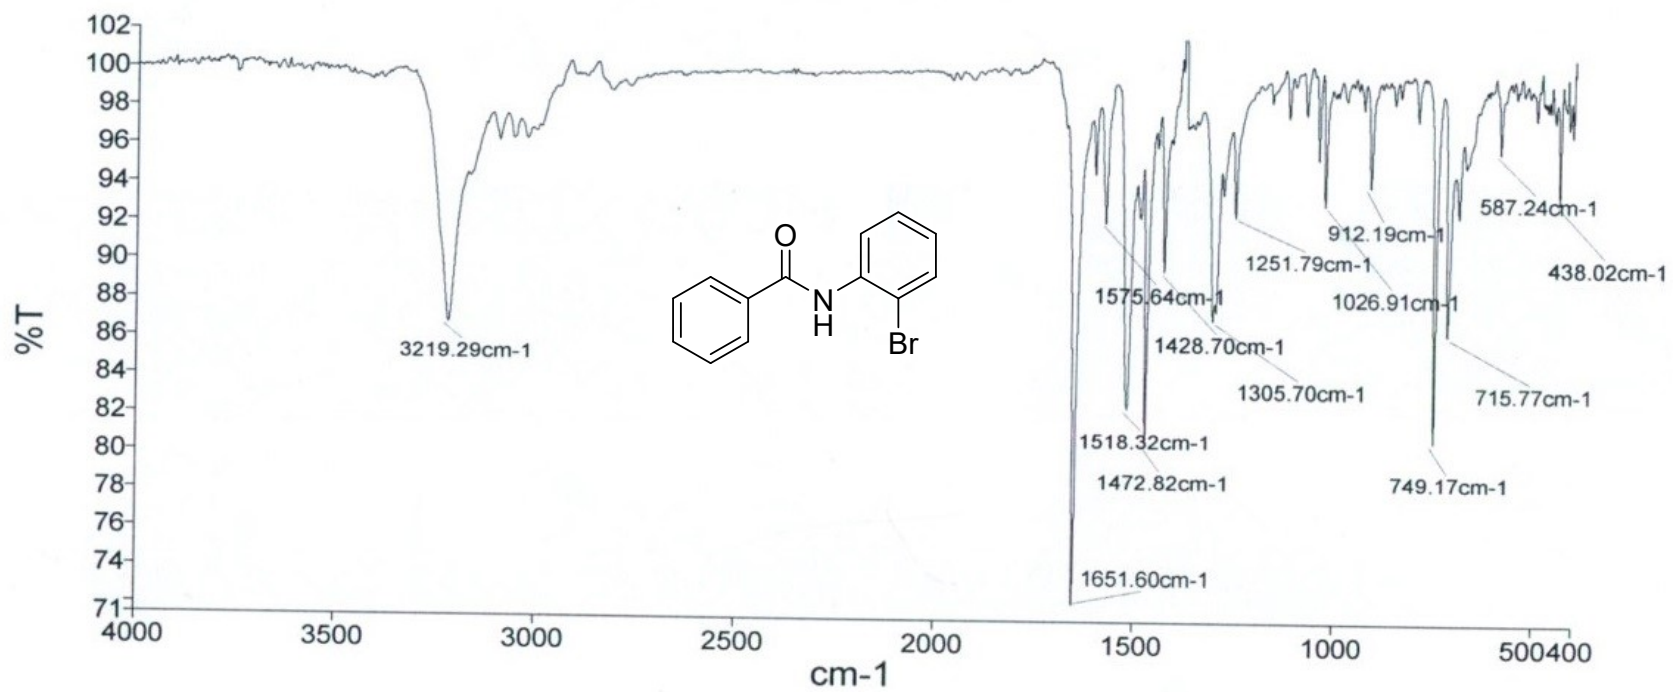

$^1\text{H}$  NMR,  $^{13}\text{C}$  NMR, mass and IR spectrum of *N*-(4-chloro-3-nitrophenyl)benzamide (3k)

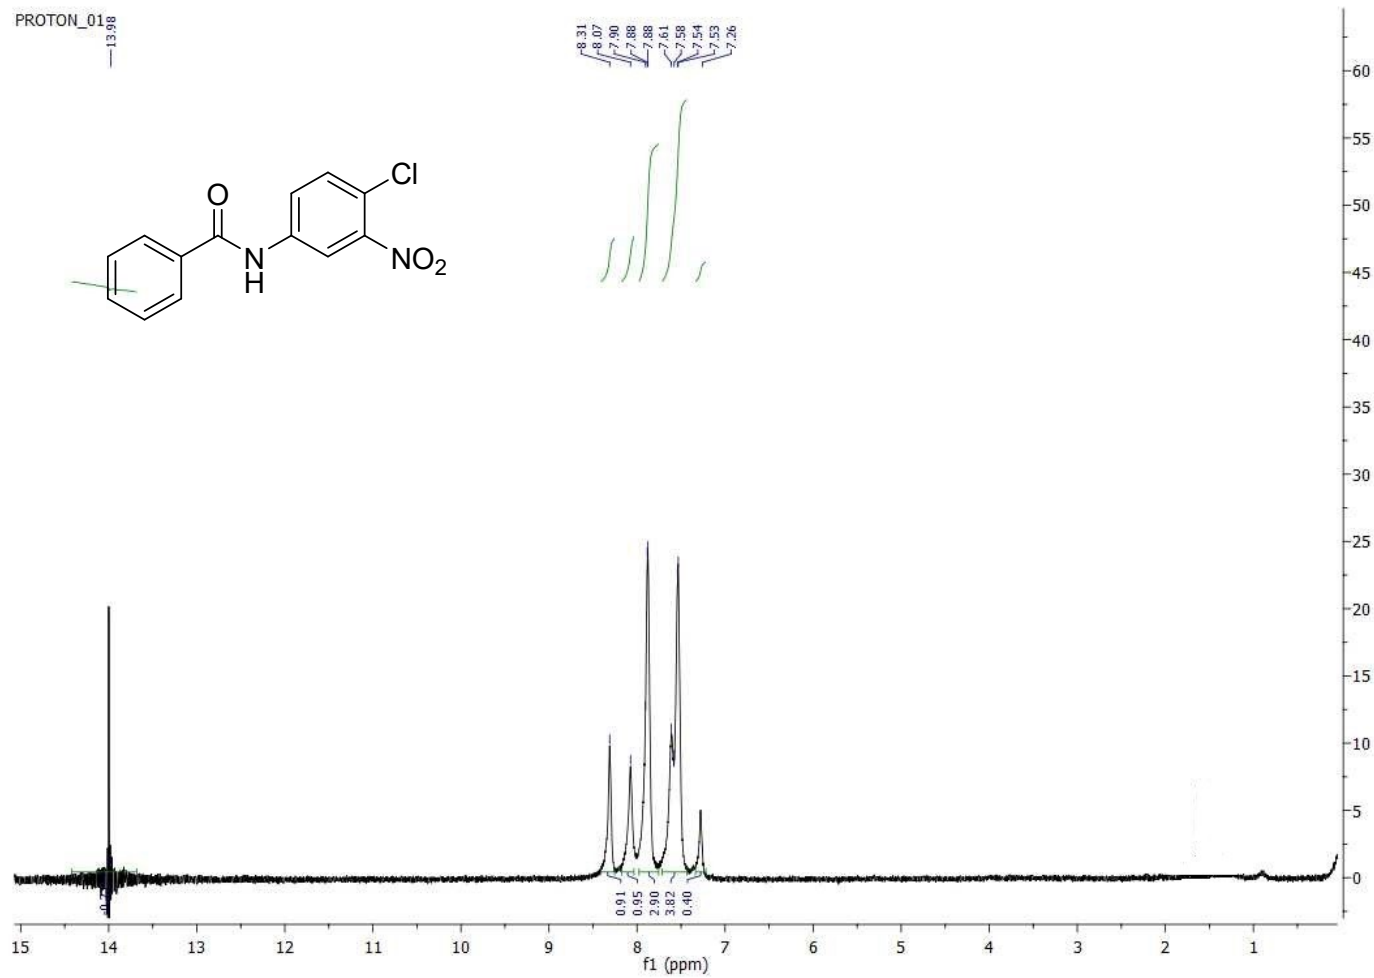

IKA395-3

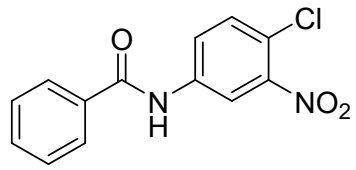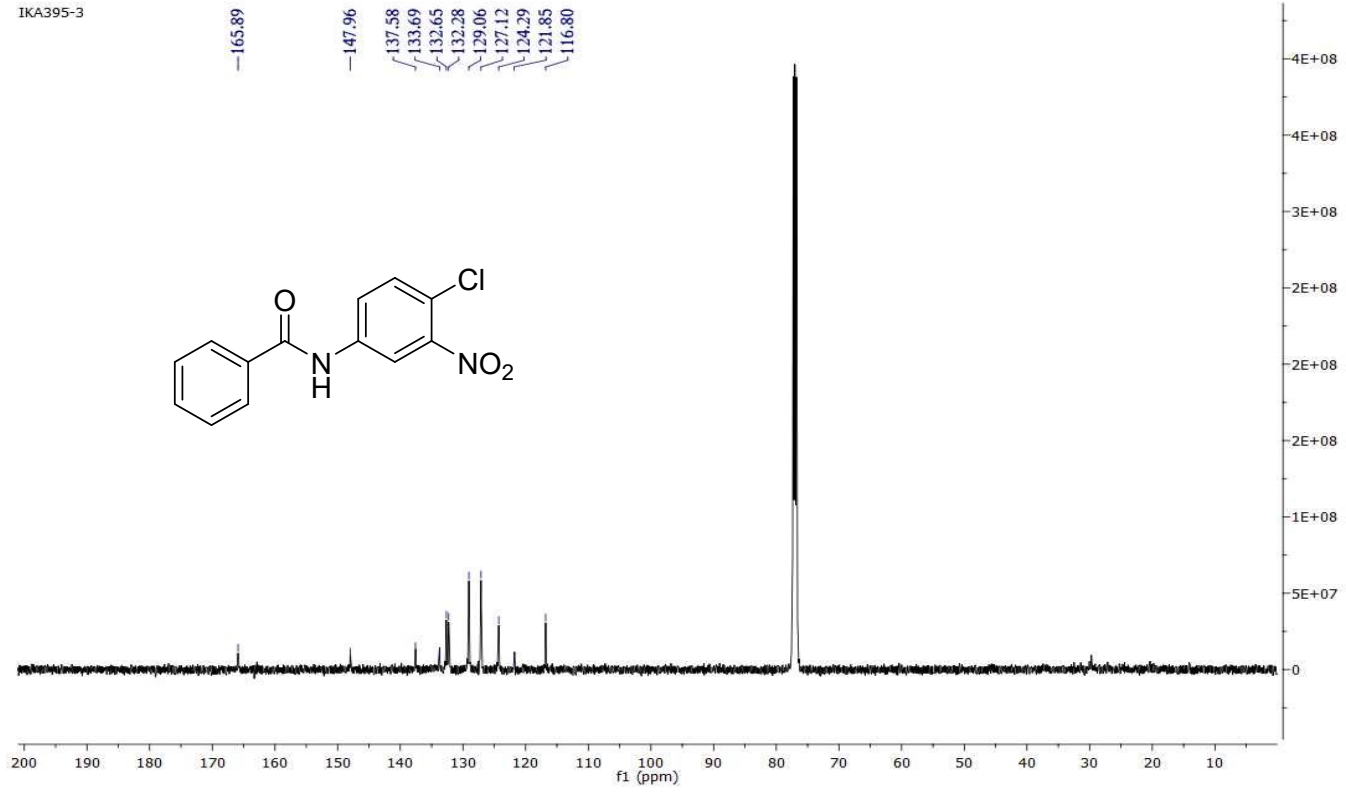

Abundance

Scan 1851 (12.856 min): IKA3 2.D\data.ms

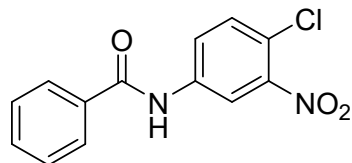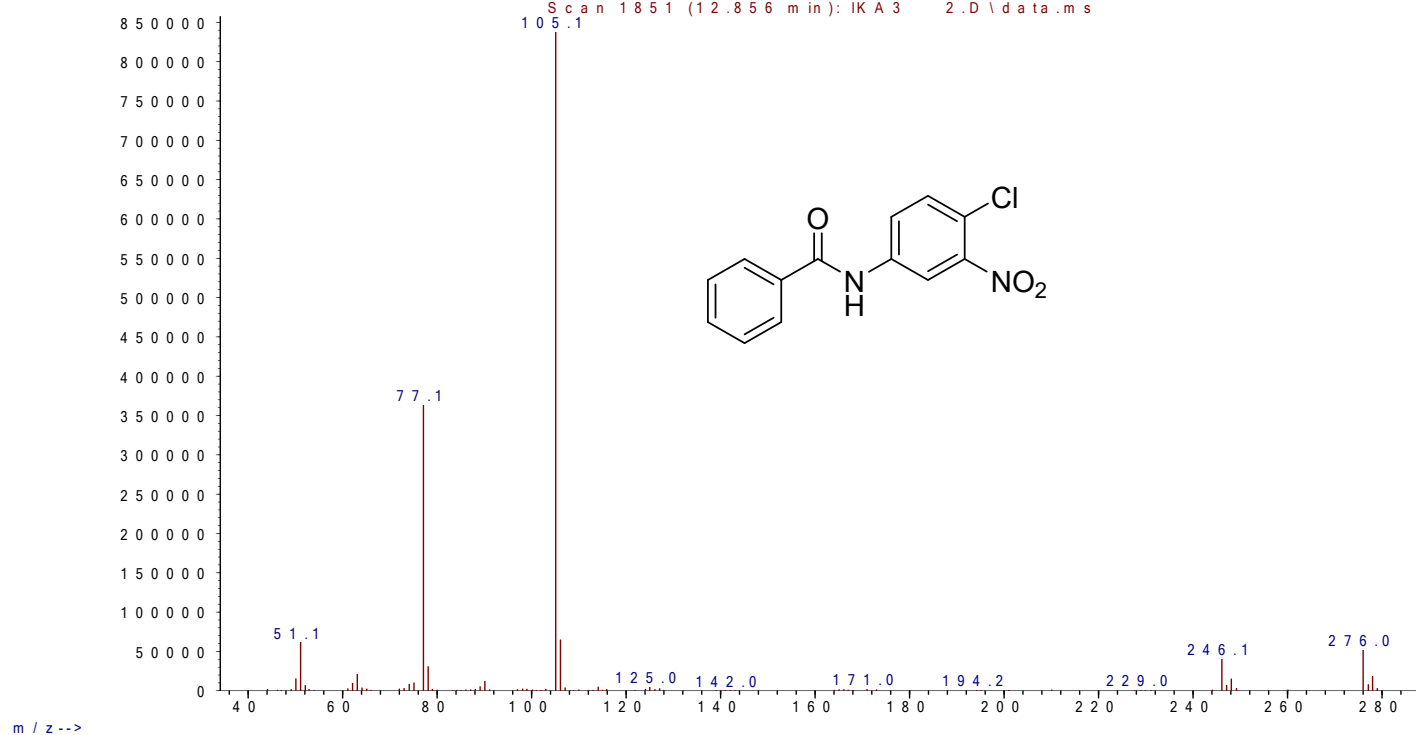

m/z-->

Abundance

Scan 1851 (12.856 min): IKA3 2.D\data.ms

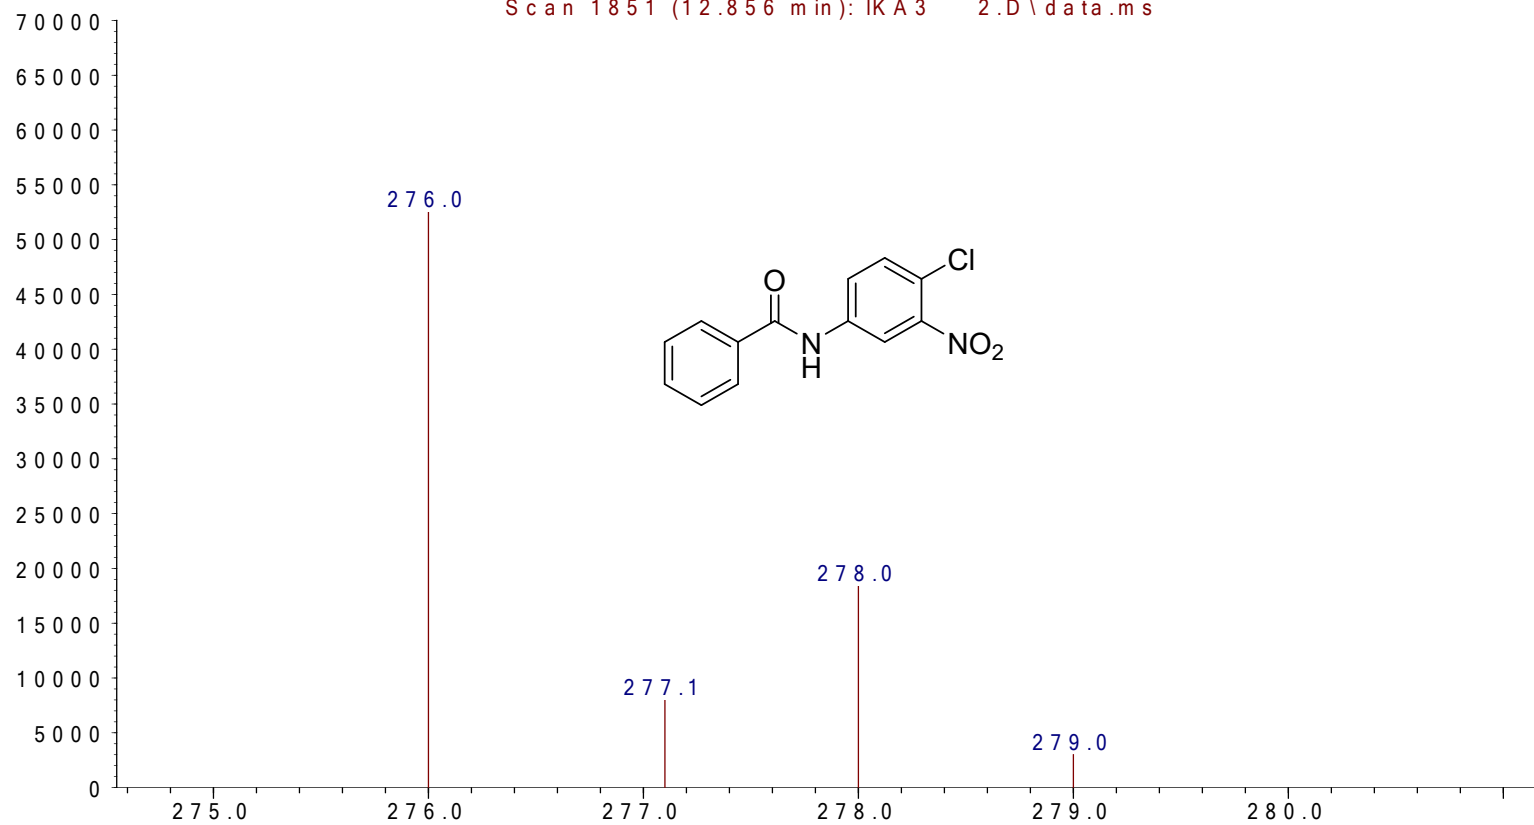

m / z-->

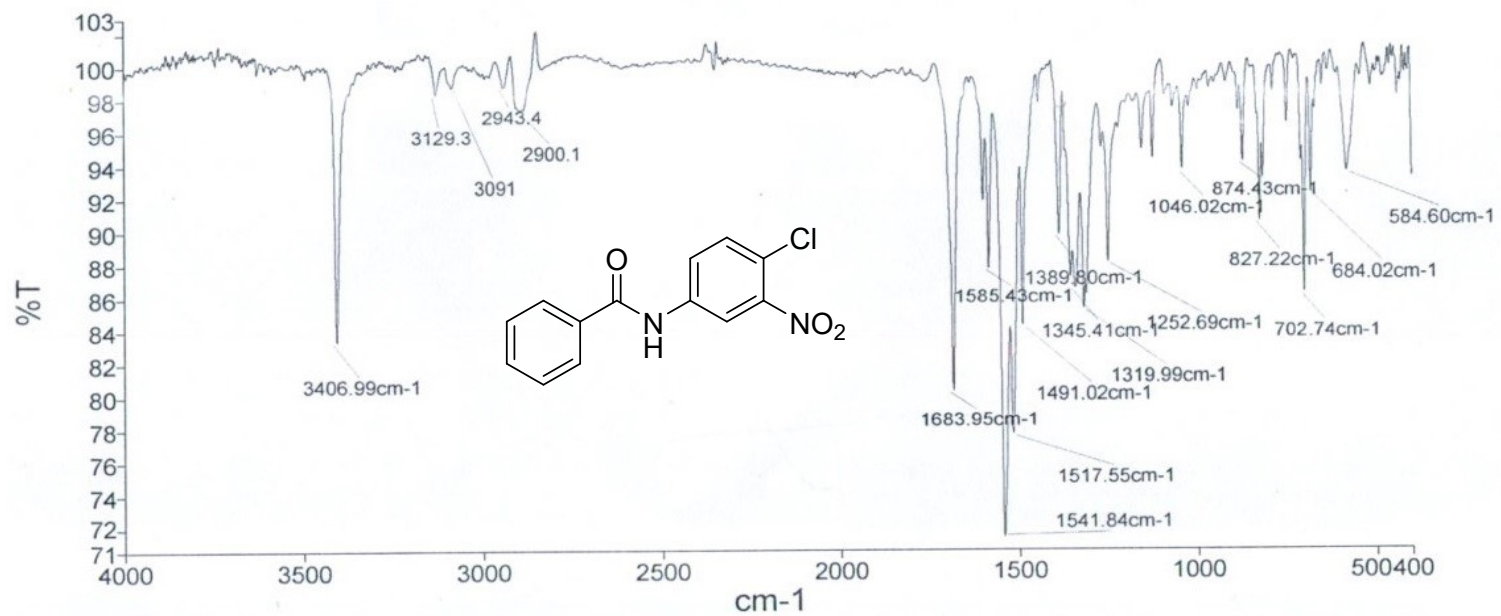

<sup>1</sup>H NMR, <sup>13</sup>C NMR, mass and IR spectrum of *N*-(4-methoxyphenyl)benzamide (3d)



IKA-396-2

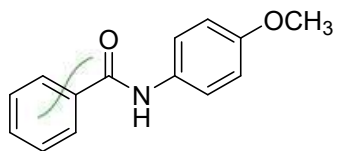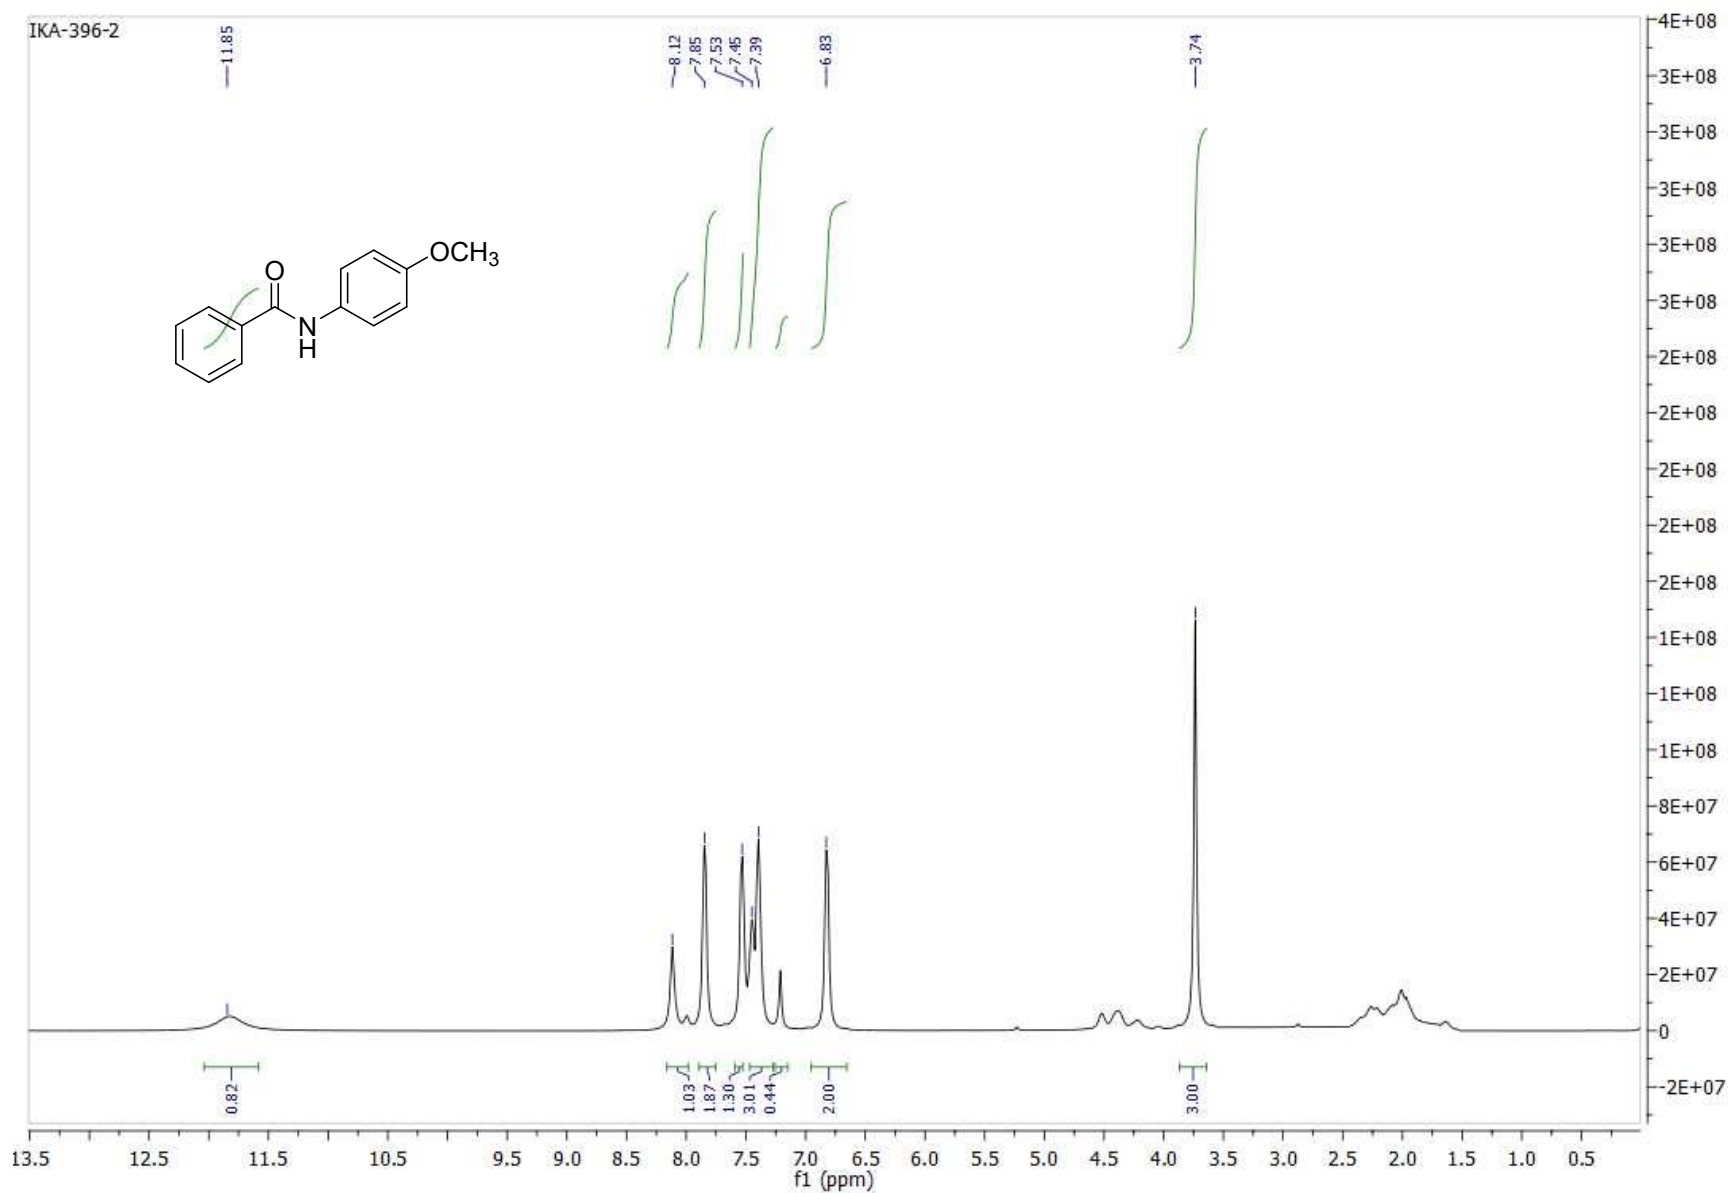

IKA396-2

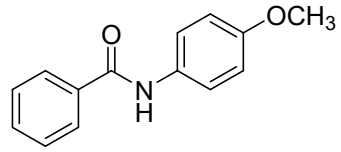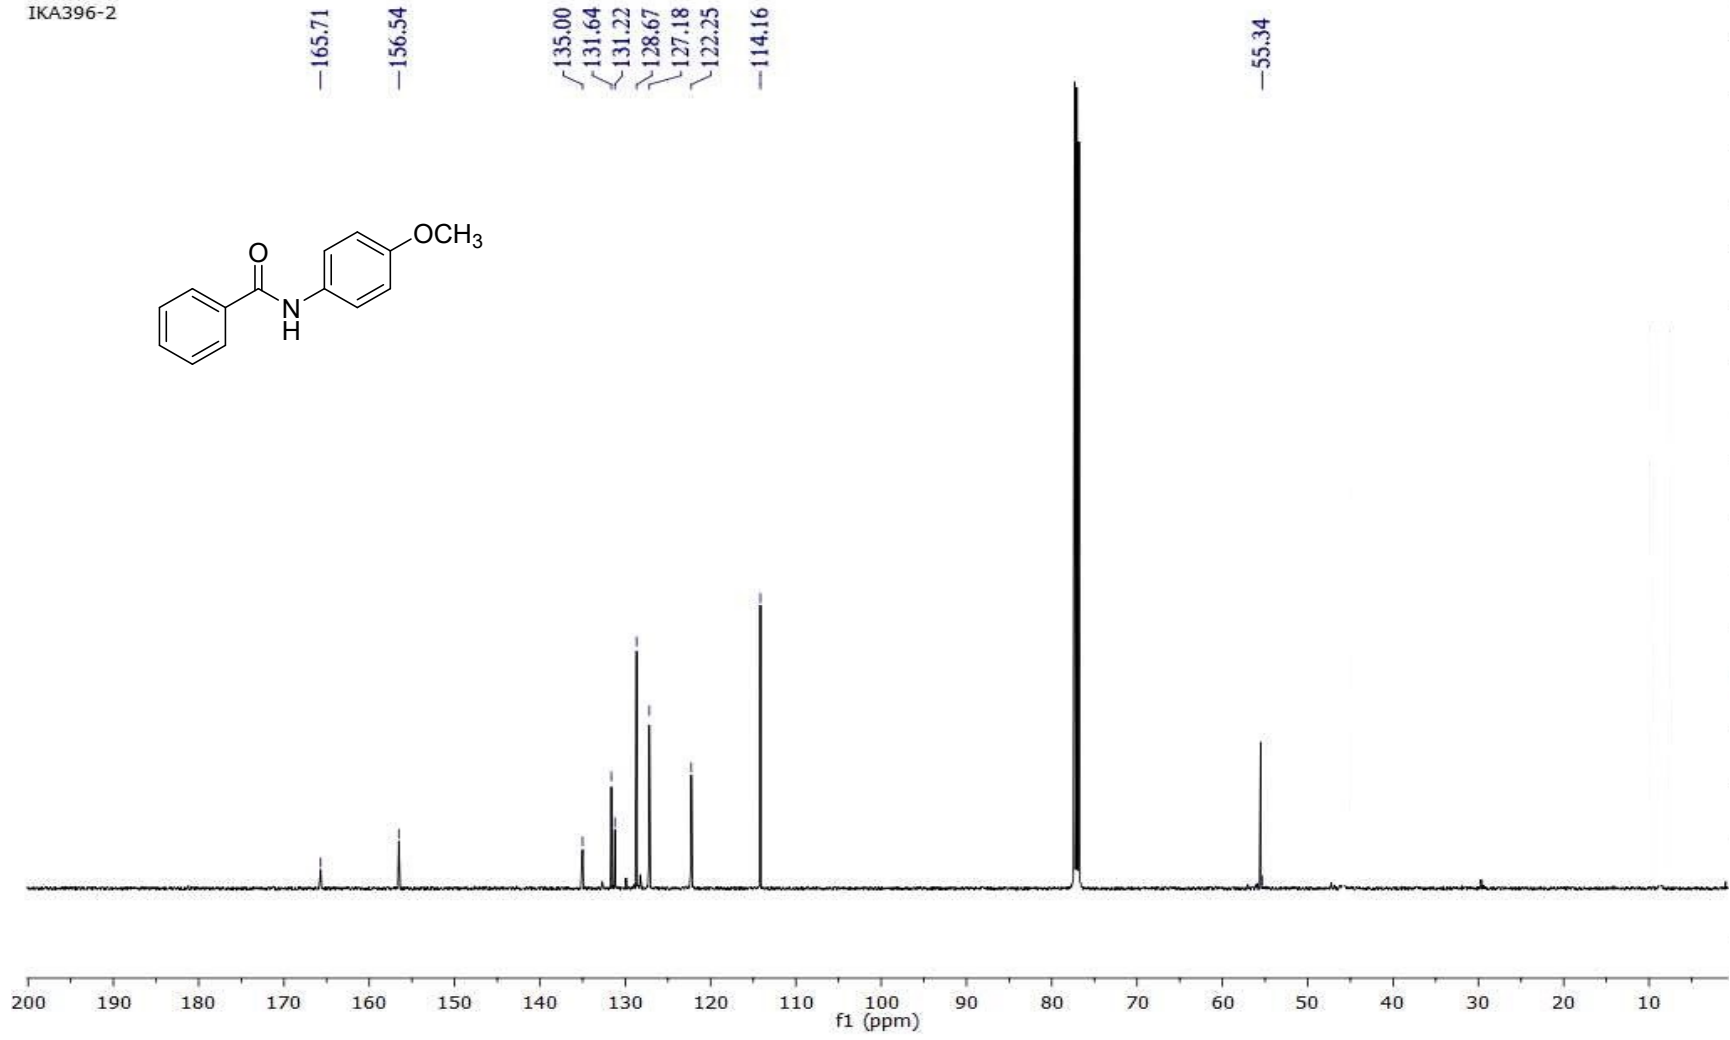

Abundance

Scan 1536 (10.852 min): IKA6 2.D\data.ms  
105.1

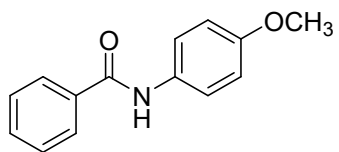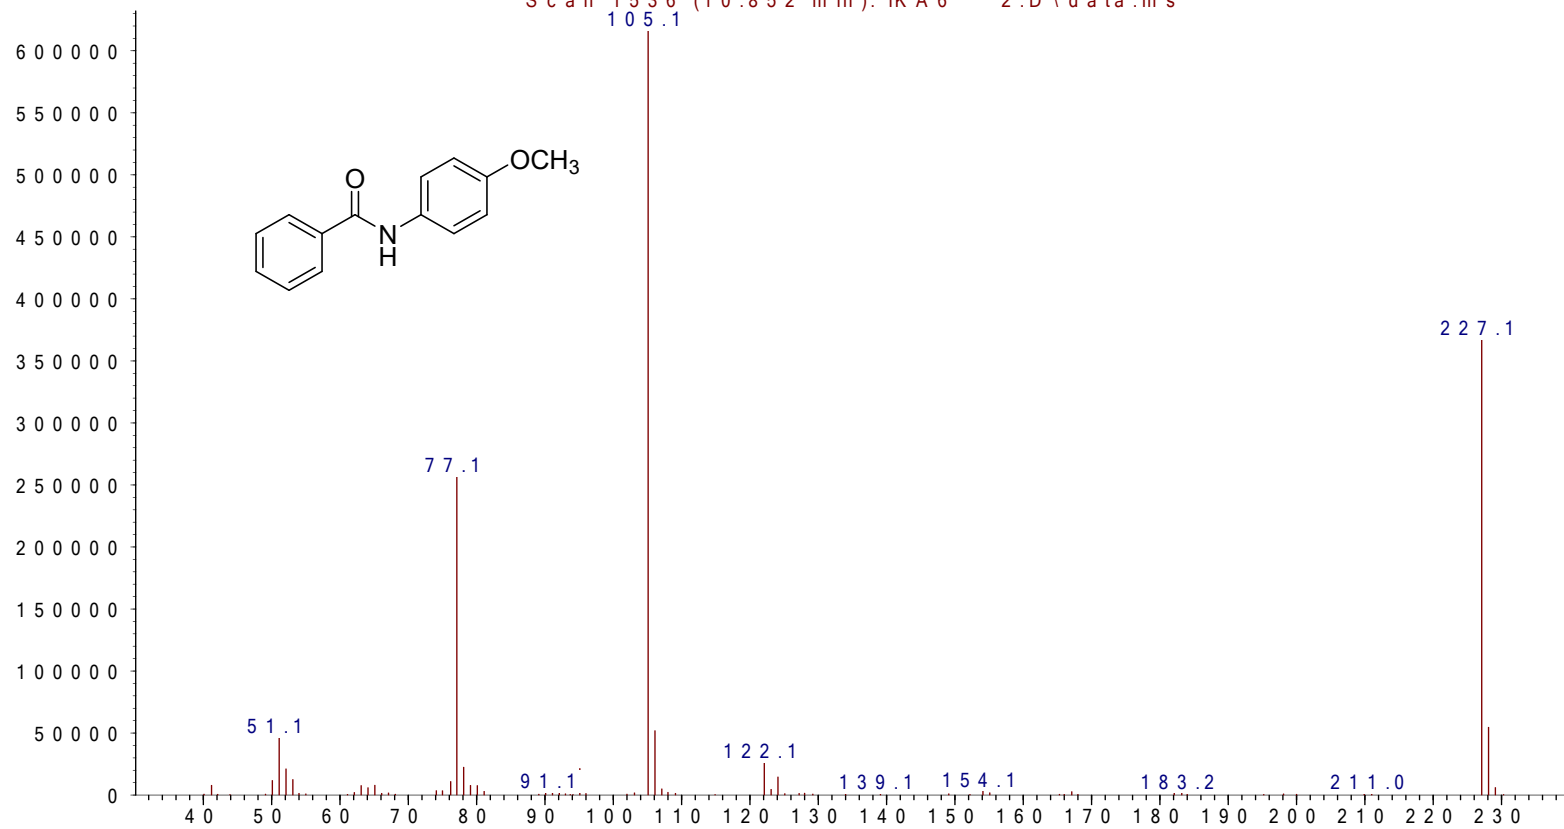

m/z-->

Abundance

Scan 1536 (10.852 min): IKA6 2.D\data.ms

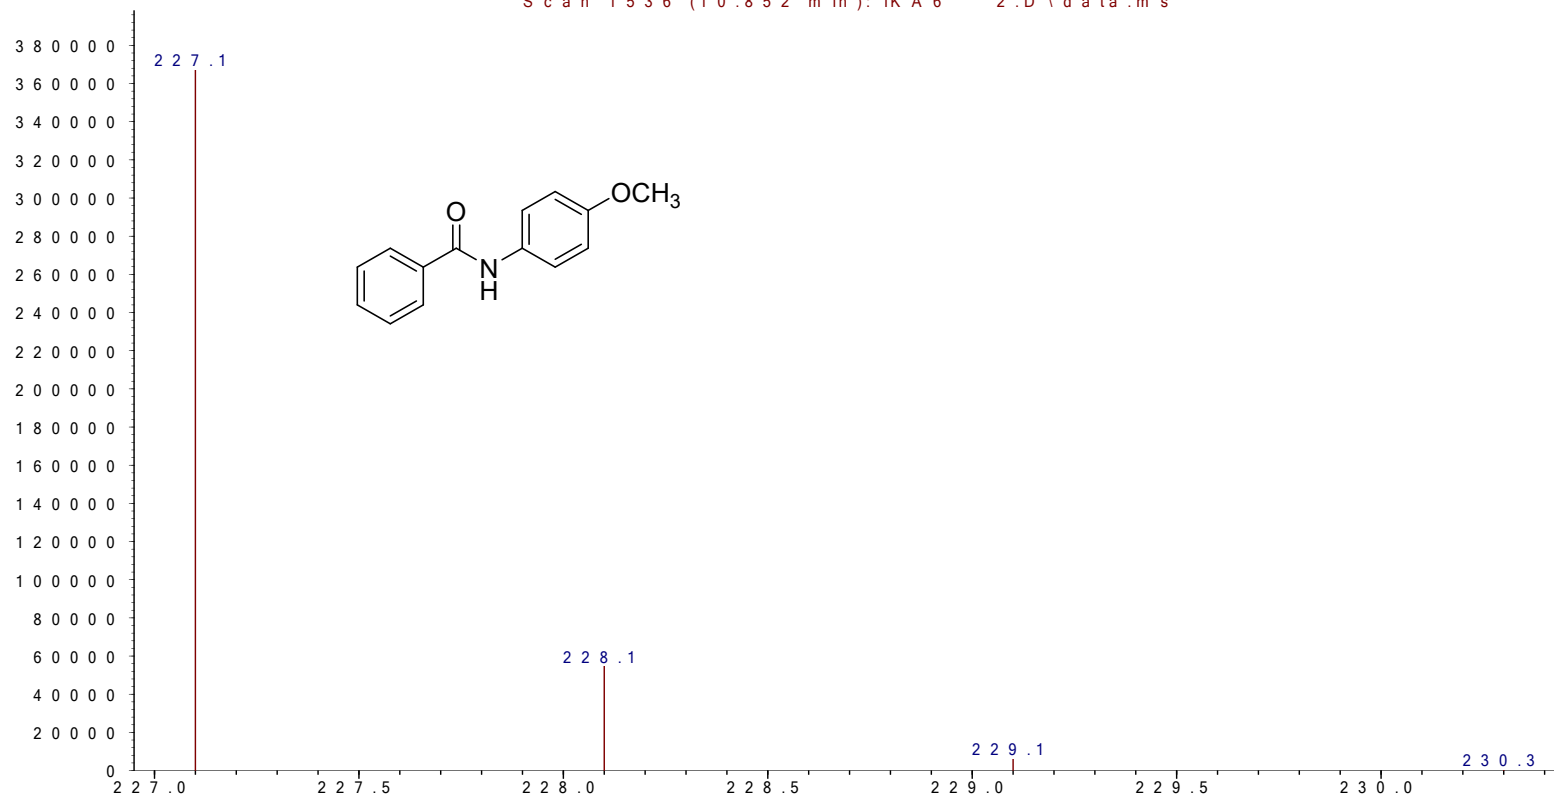

m / z-->

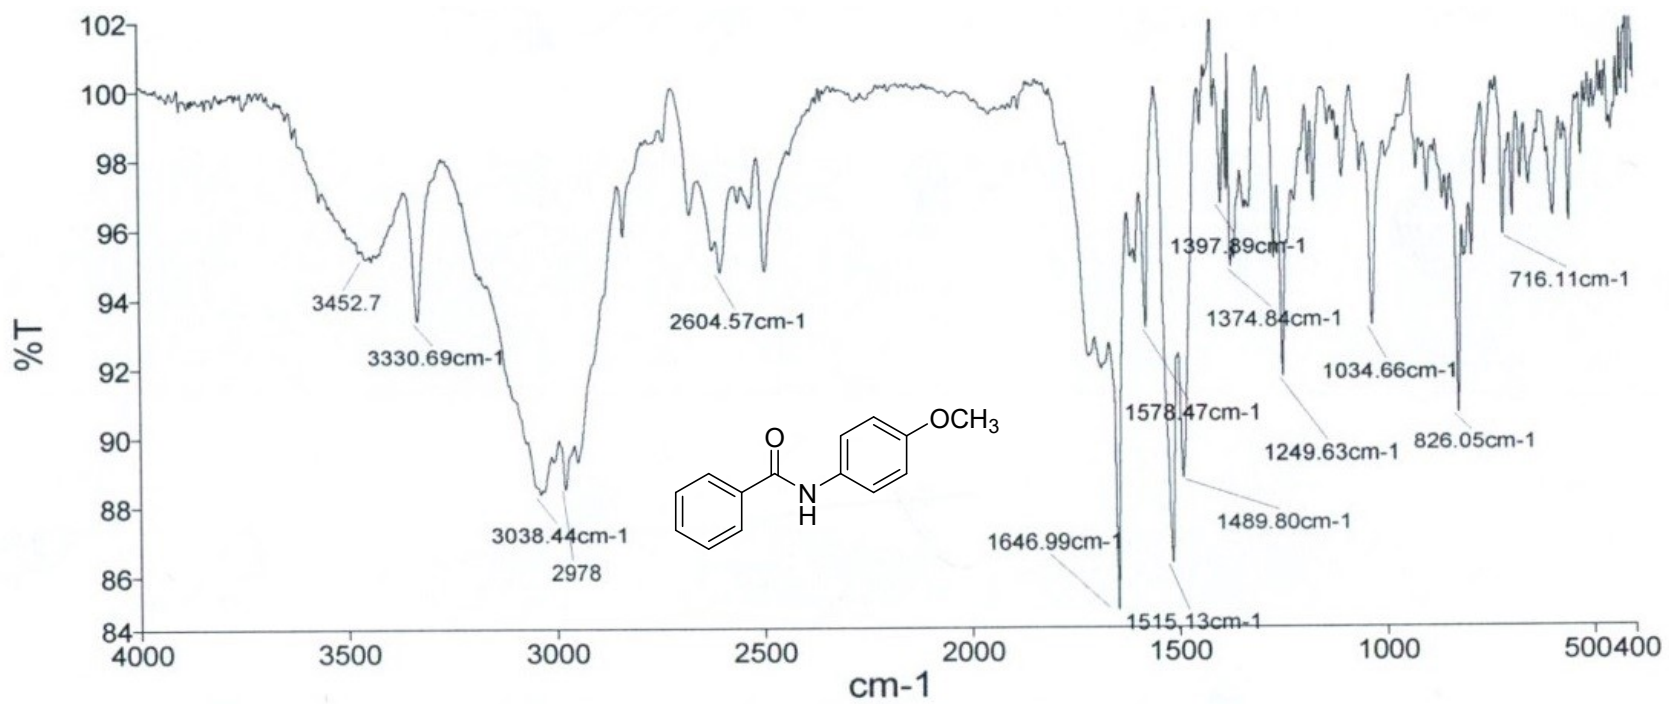

<sup>1</sup>H NMR, mass and IR spectrum of *N*-(2-chlorophenyl)benzamide (3h)

IKA-396-3

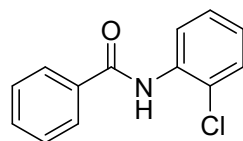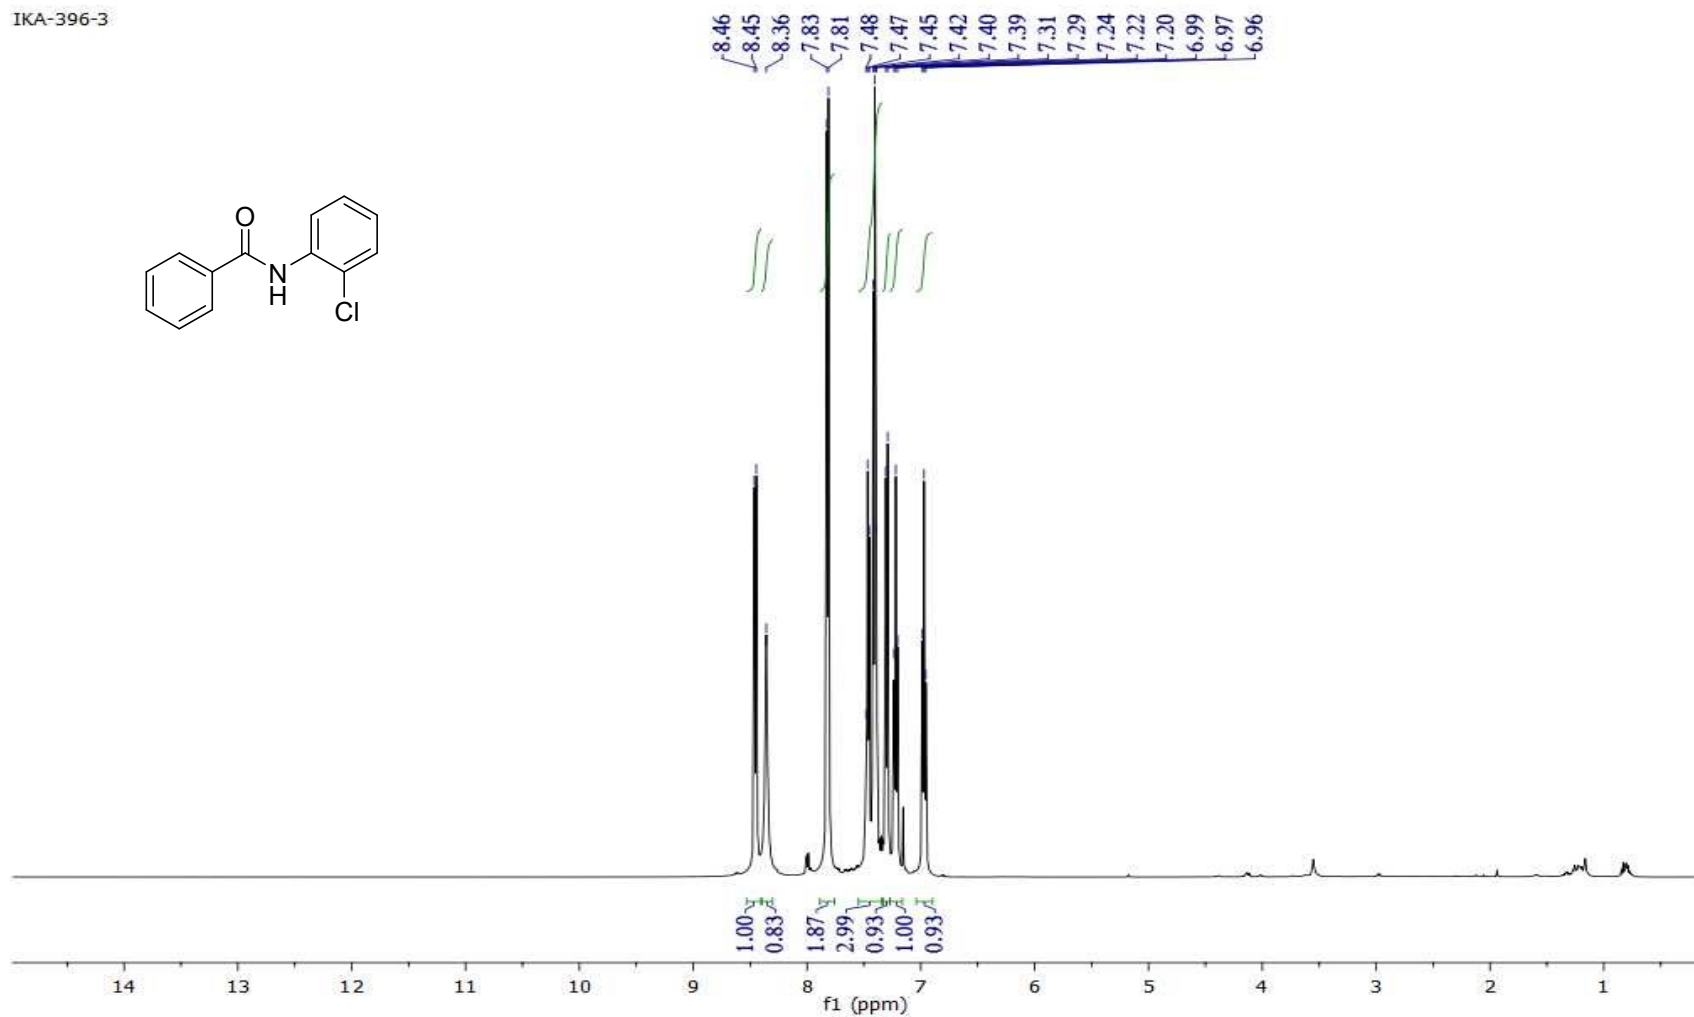

Abundance

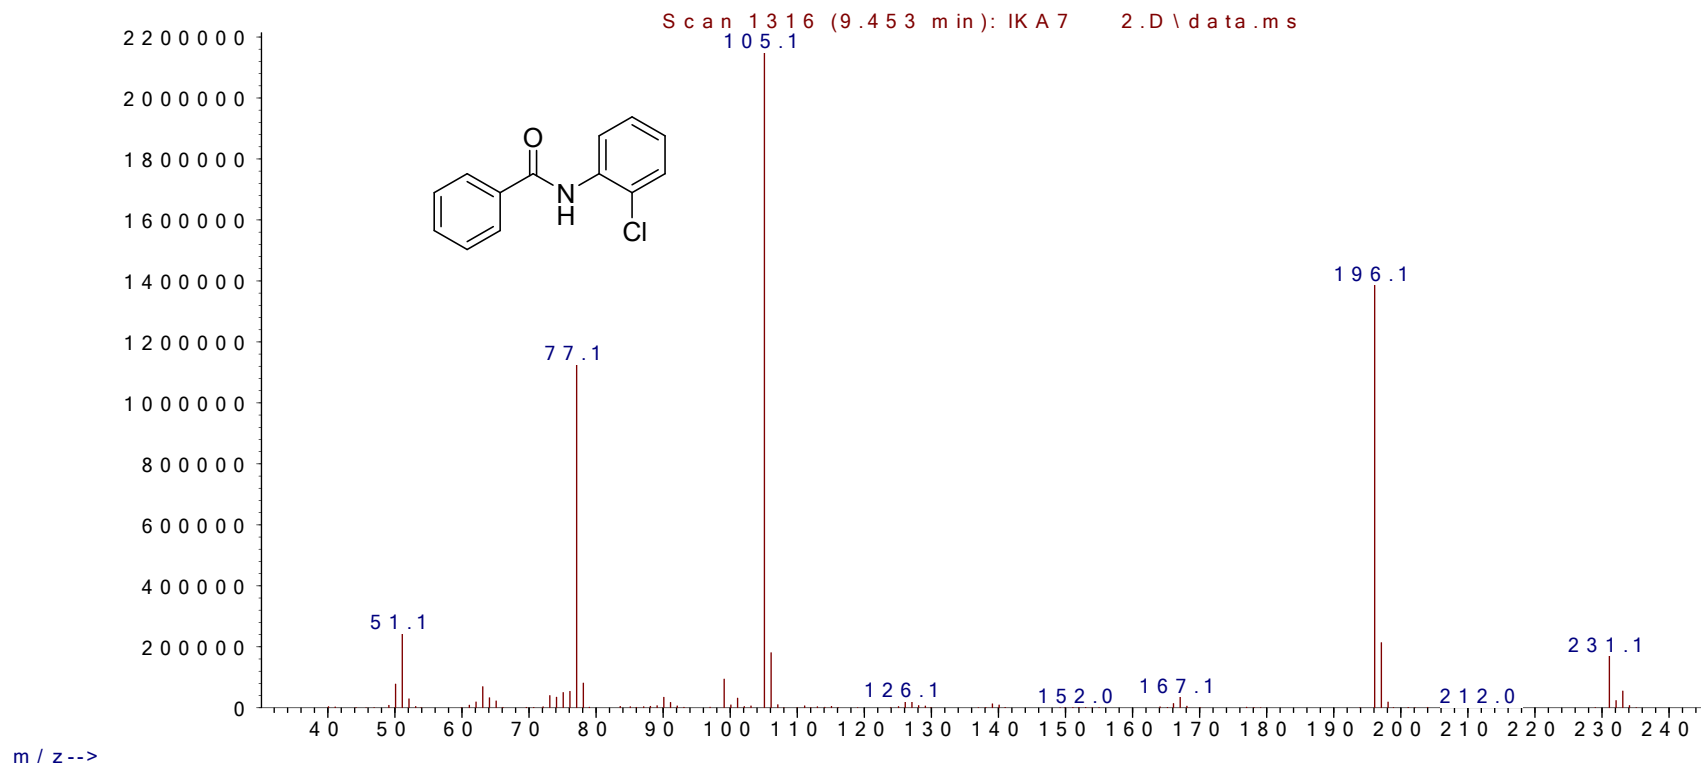

Abundance

Scan 1316 (9.453 min): IKA7 2.D\data.ms

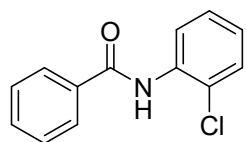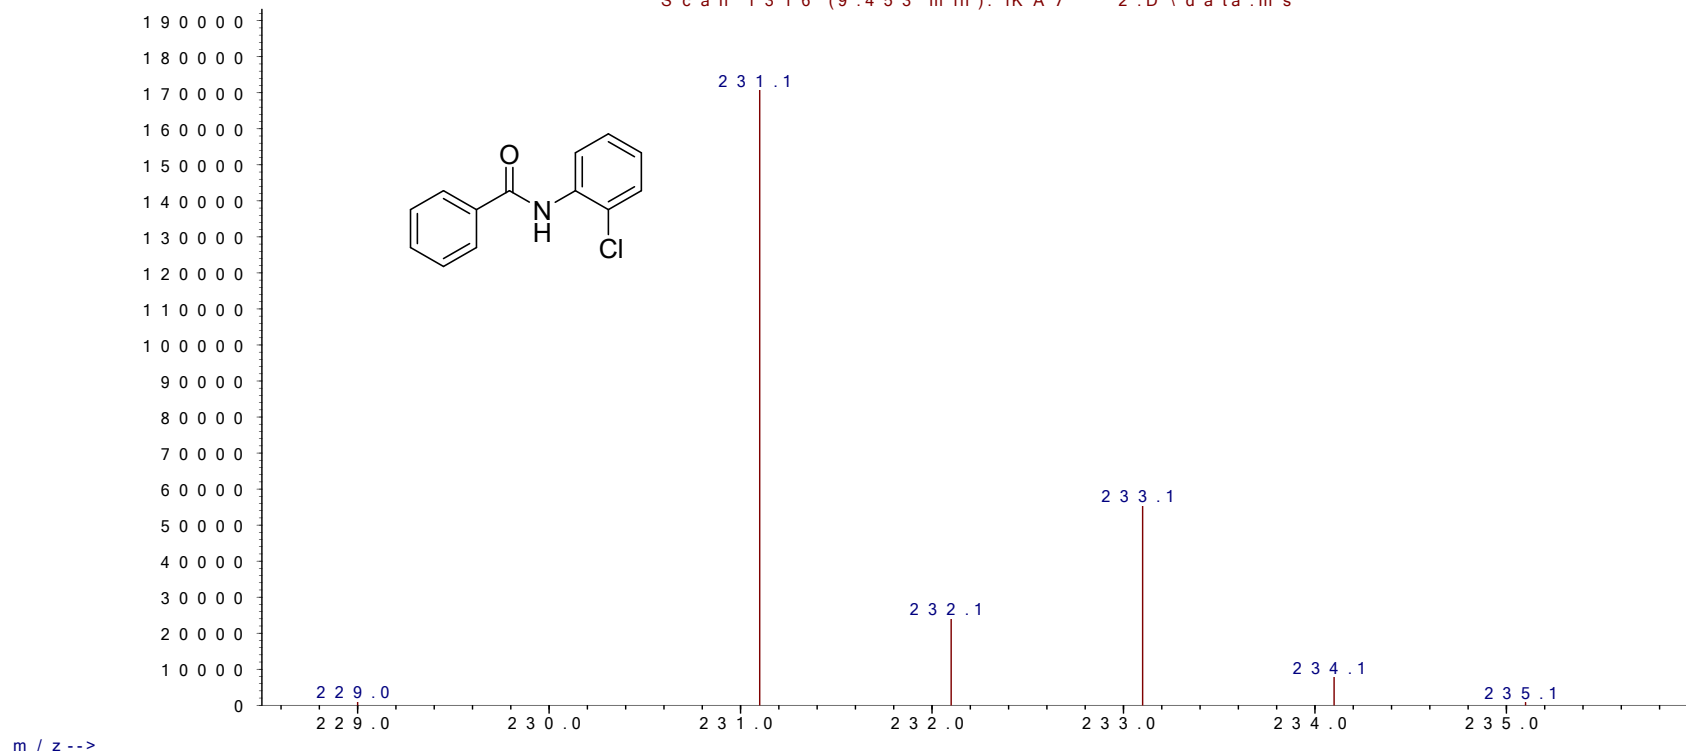



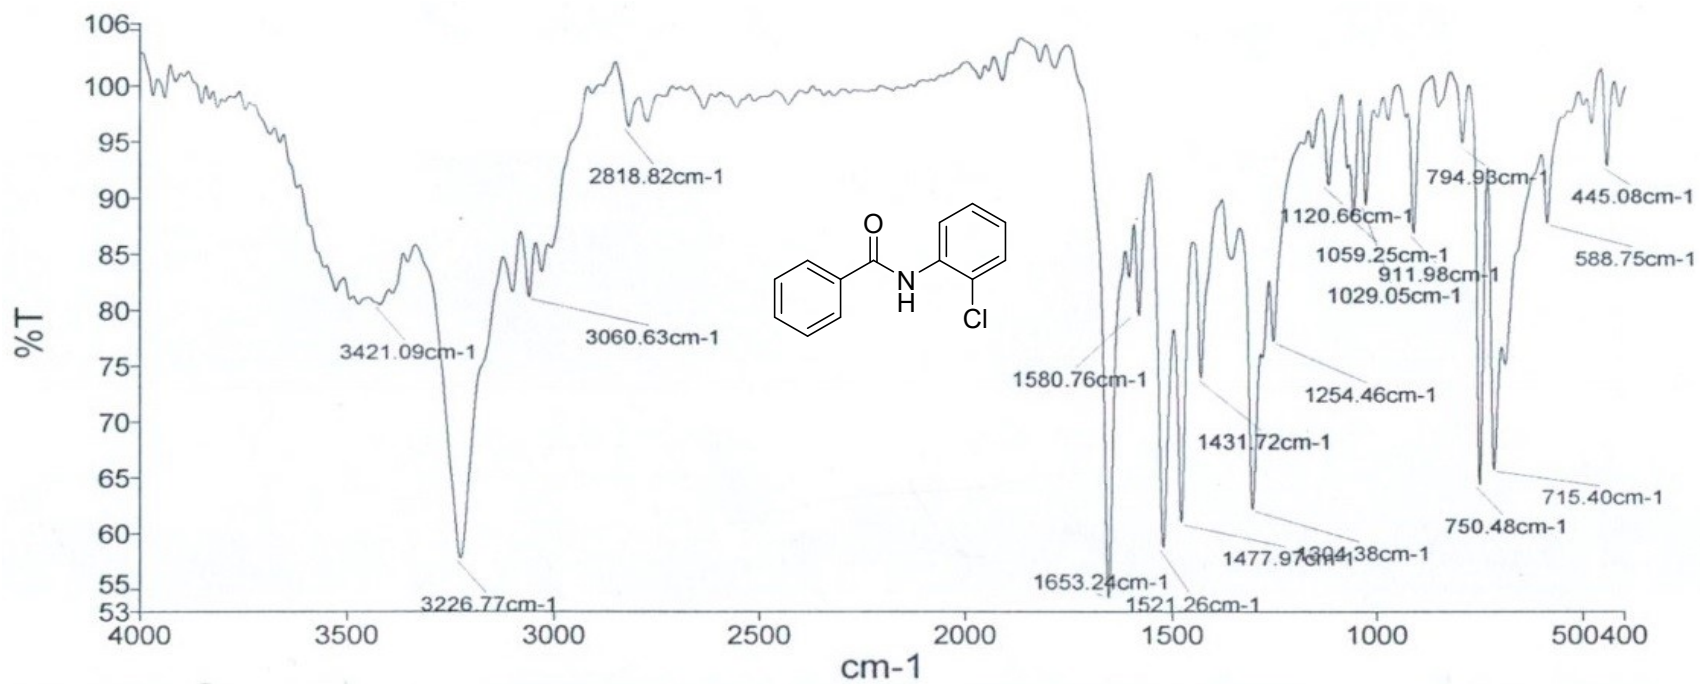

$^1\text{H}$  NMR,  $^{13}\text{C}$  NMR, mass and IR spectrum of *N*-(2-iodophenyl)benzamide (3f)

IKA-396-4

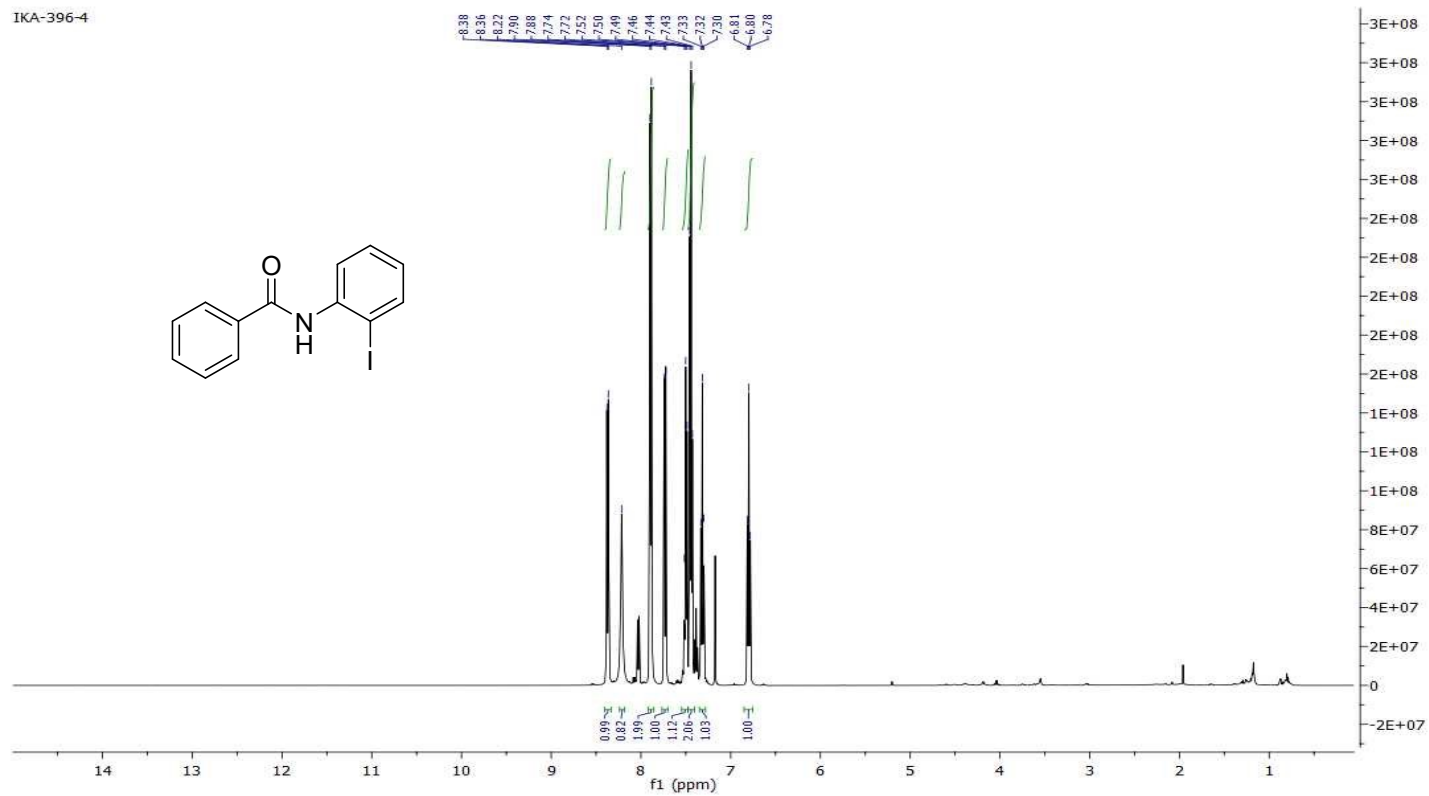

IKA396-4

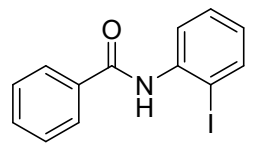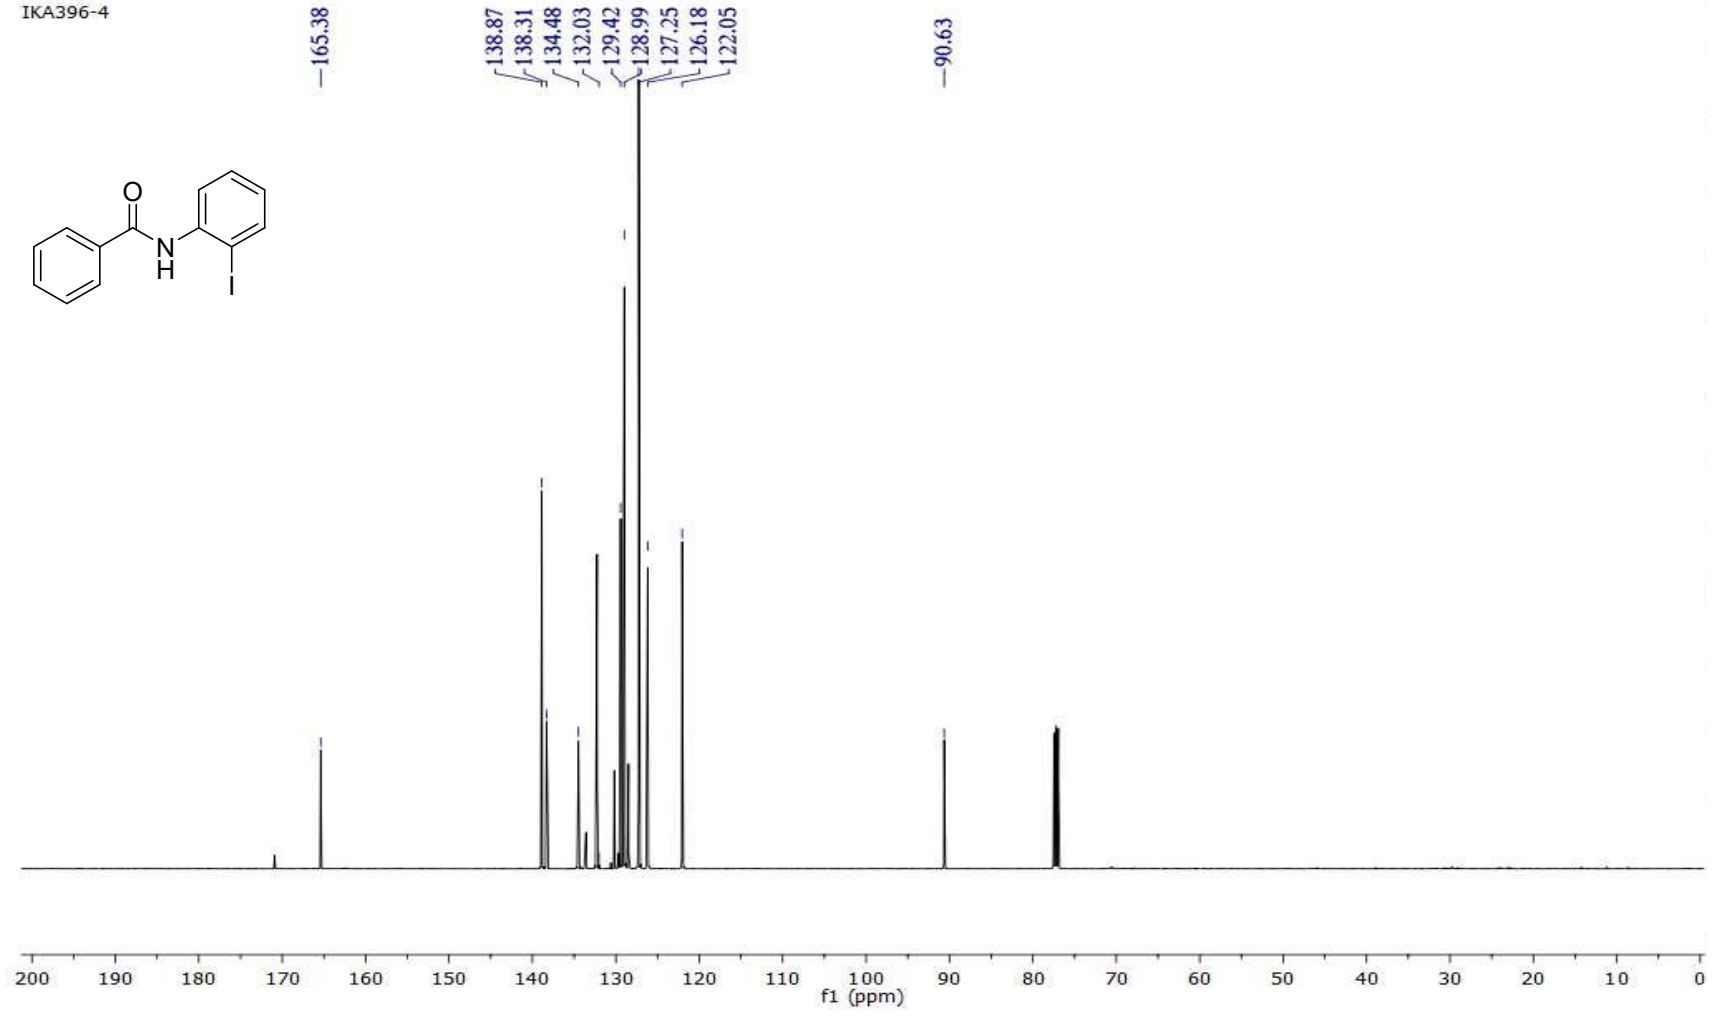

Abundance

Scan 1520 (10.751 min): IKA8 2.D\data.ms

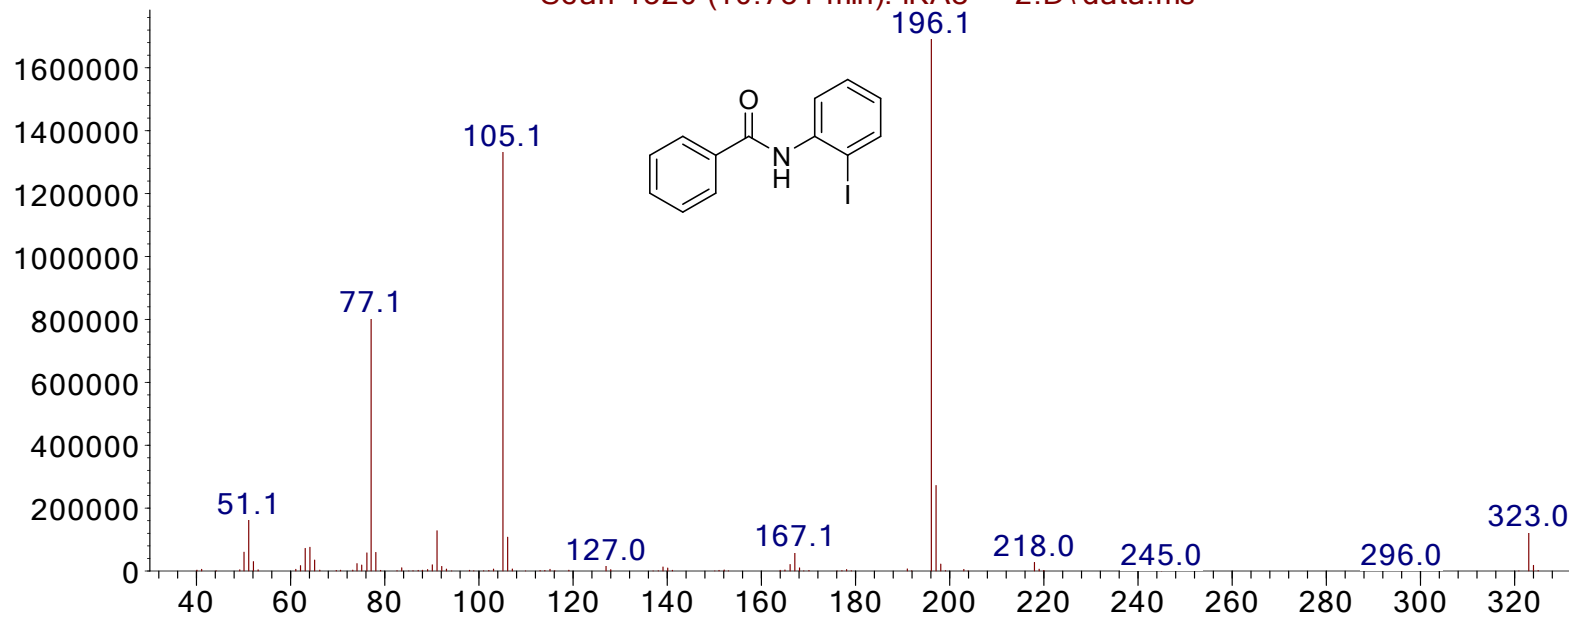

m/z-->

Abundance

Scan 1520 (10.751 min): IKA8 2.D\data.ms

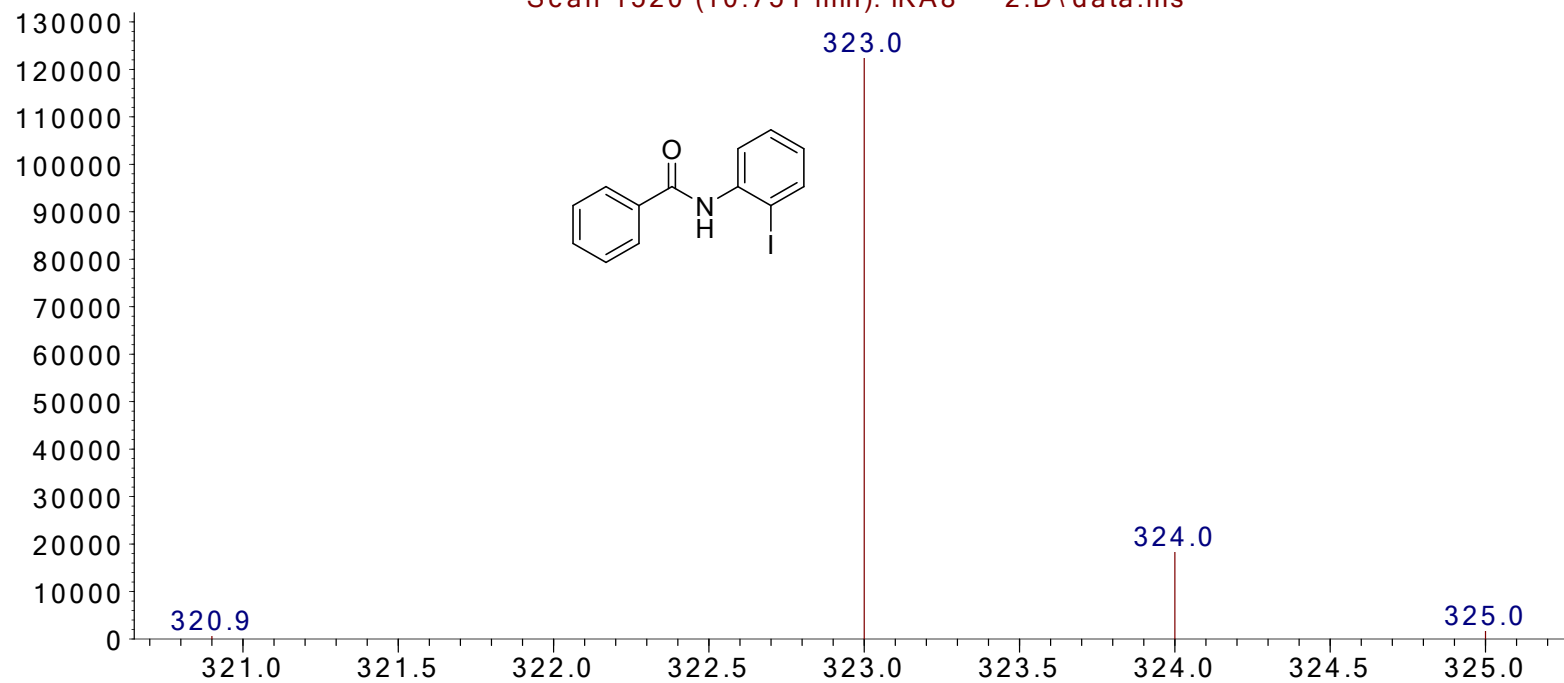

m/z-->

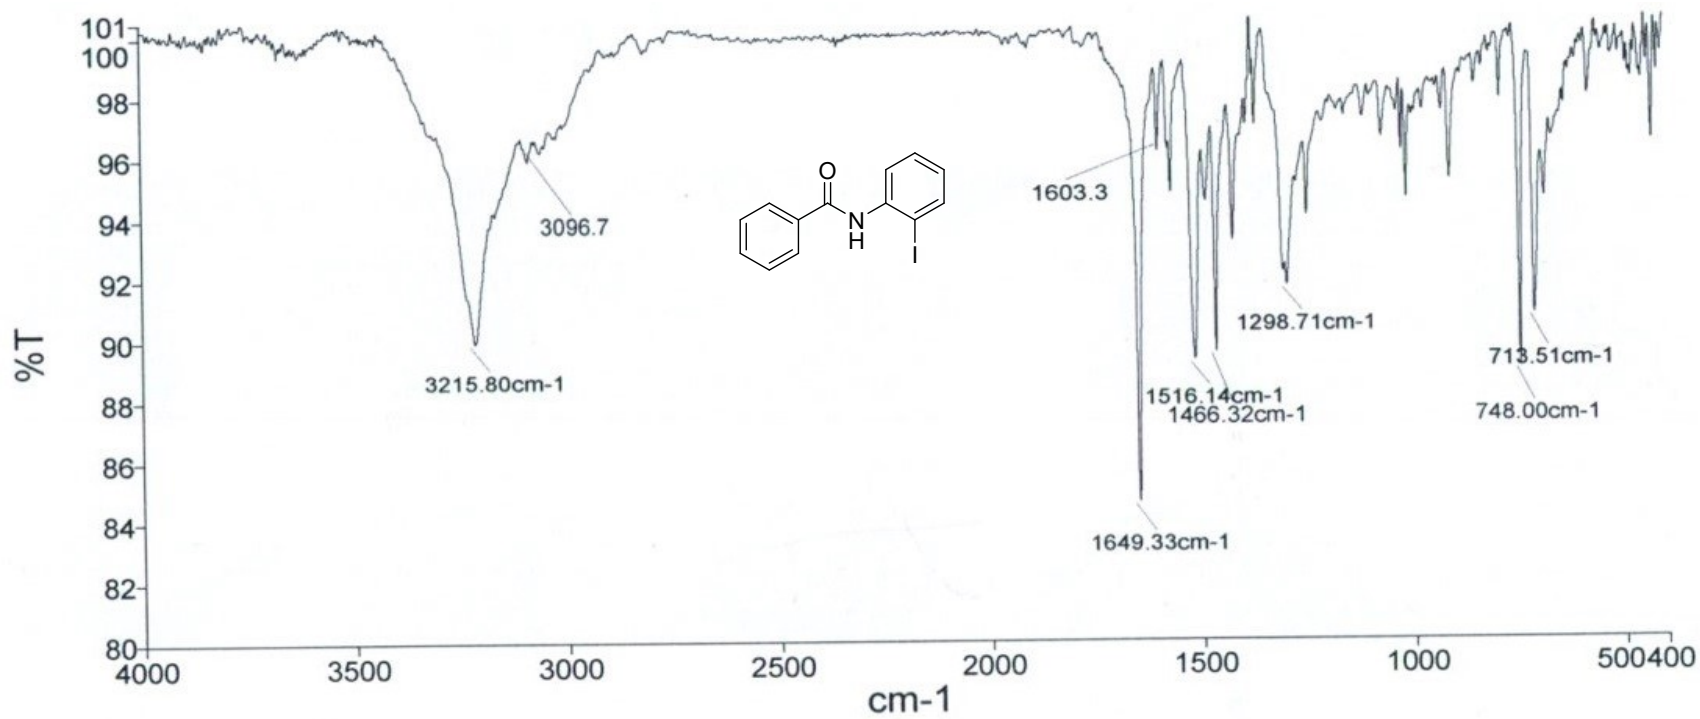

$^1\text{H}$  NMR, mass and IR spectrum of *N*-(4-chlorophenyl)benzamide (3j)

IKA-396-5

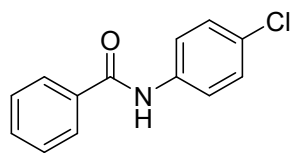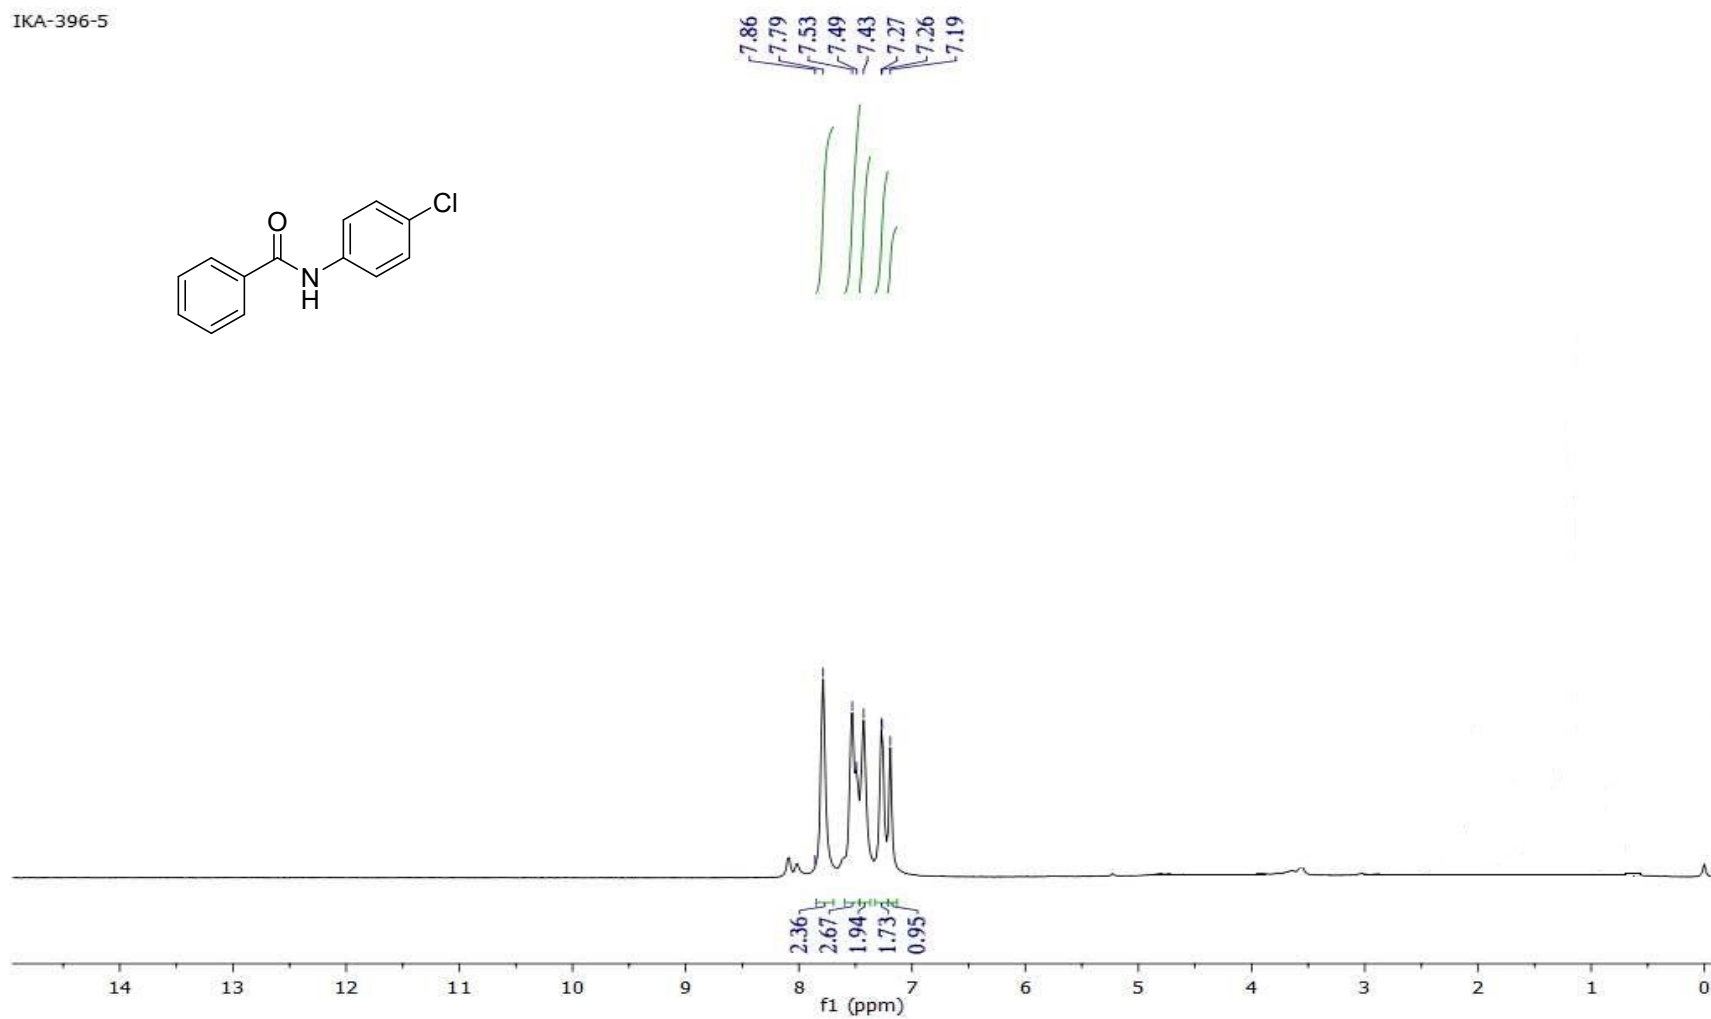

Abundance

Scan 1473 (10.452 min): IKA9 2.D\data.ms

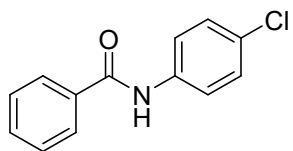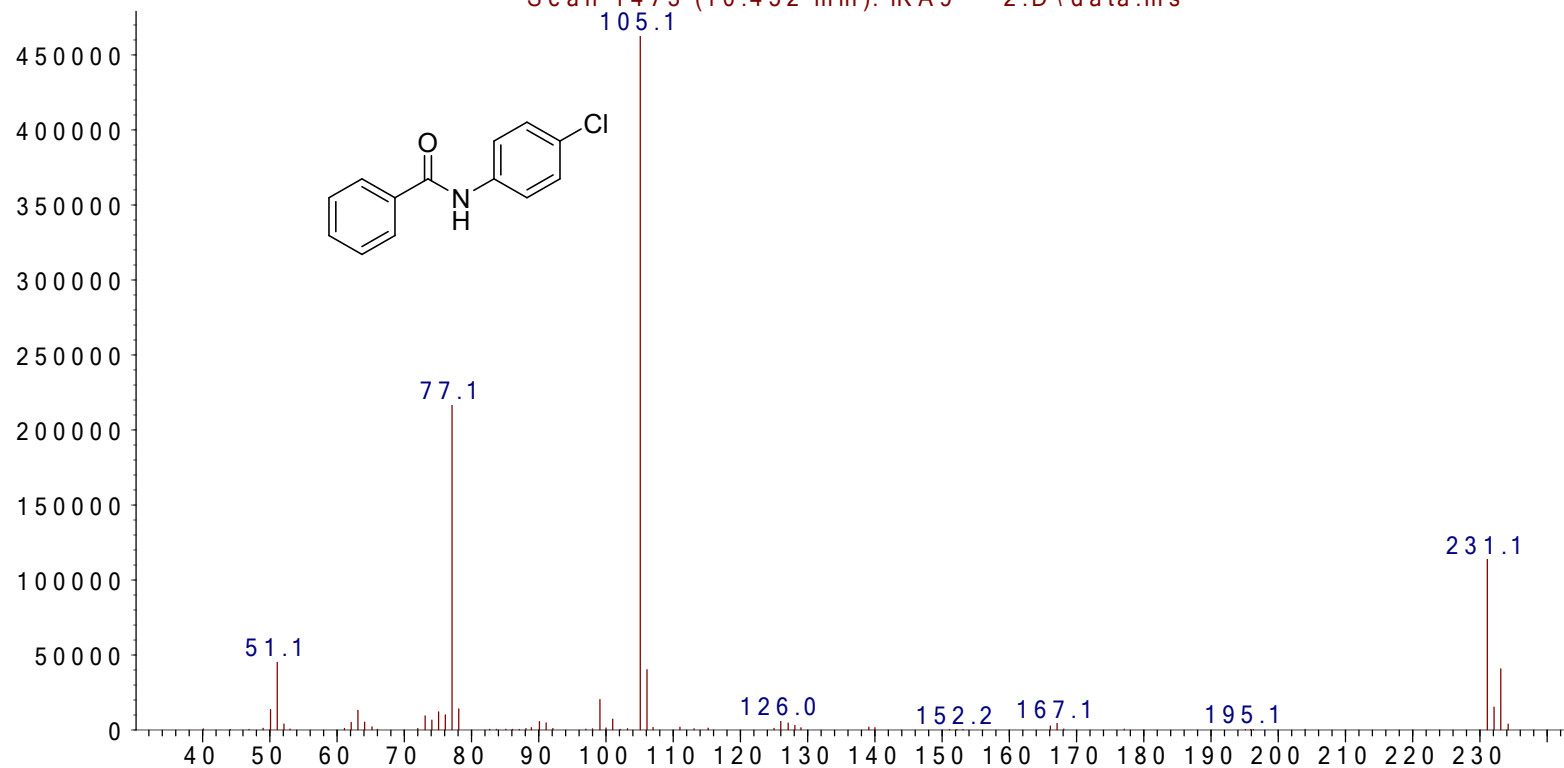

m/z-->



Abundance

Scan 1473 (10.452 min): IKA9 2.D\data.ms

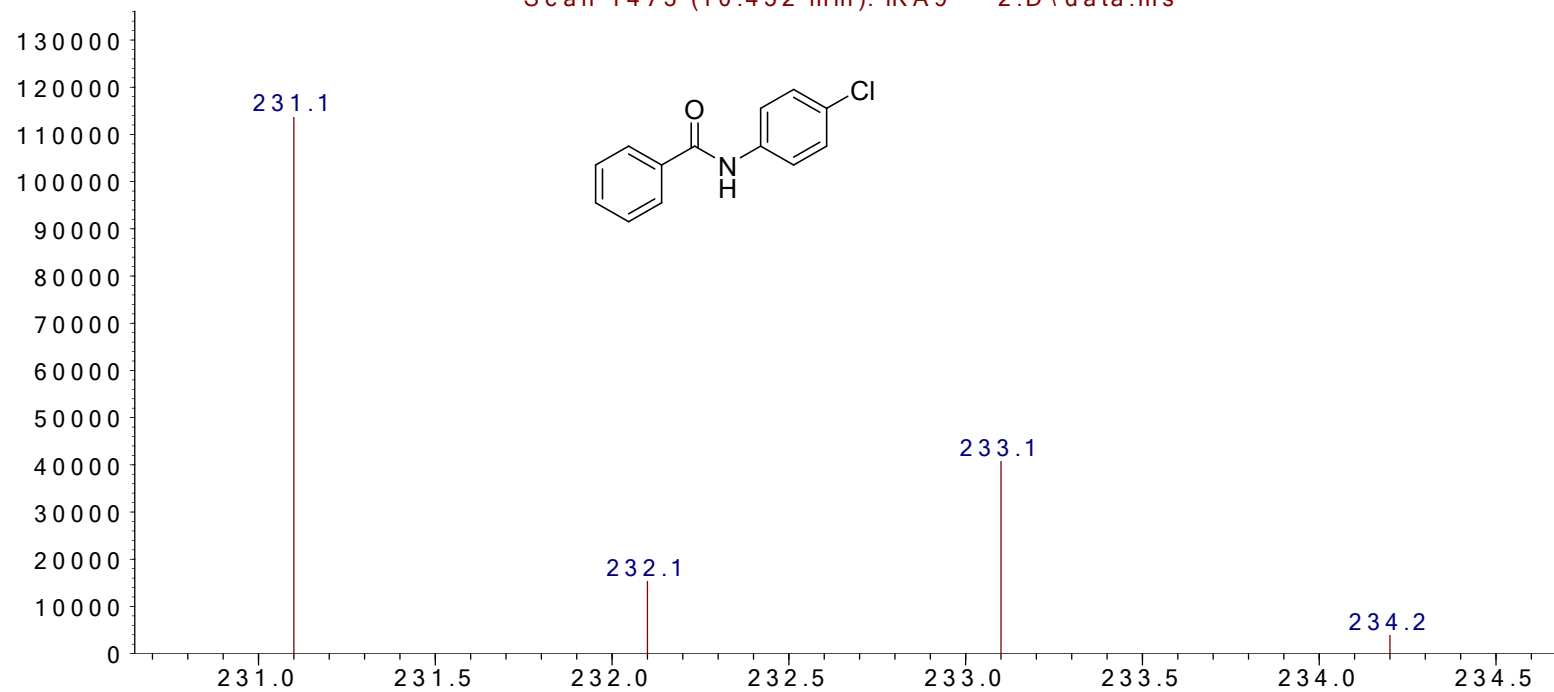

m/z-->

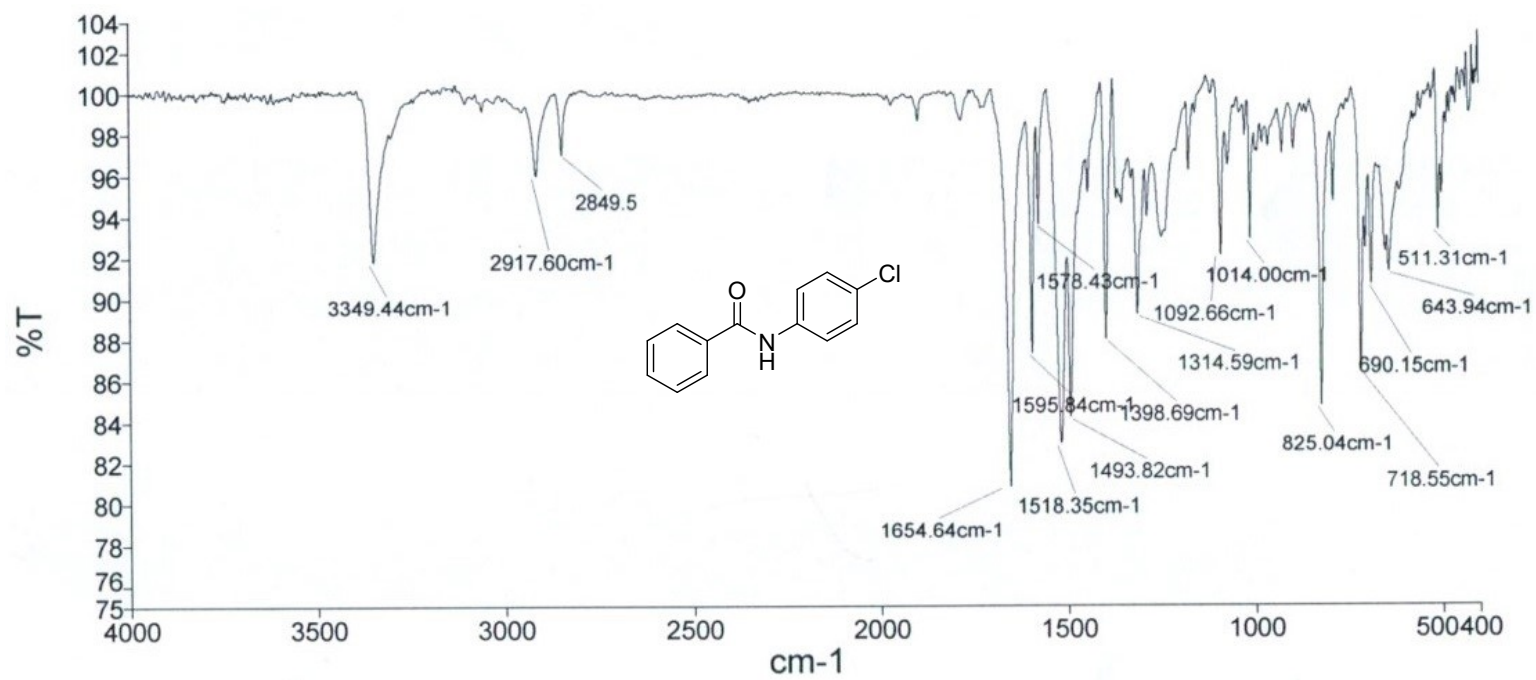

$^1\text{H}$  NMR,  $^{13}\text{C}$  NMR, mass and IR spectrum of *N*-(4-bromophenyl)benzamide (3i)

IKA-397-1

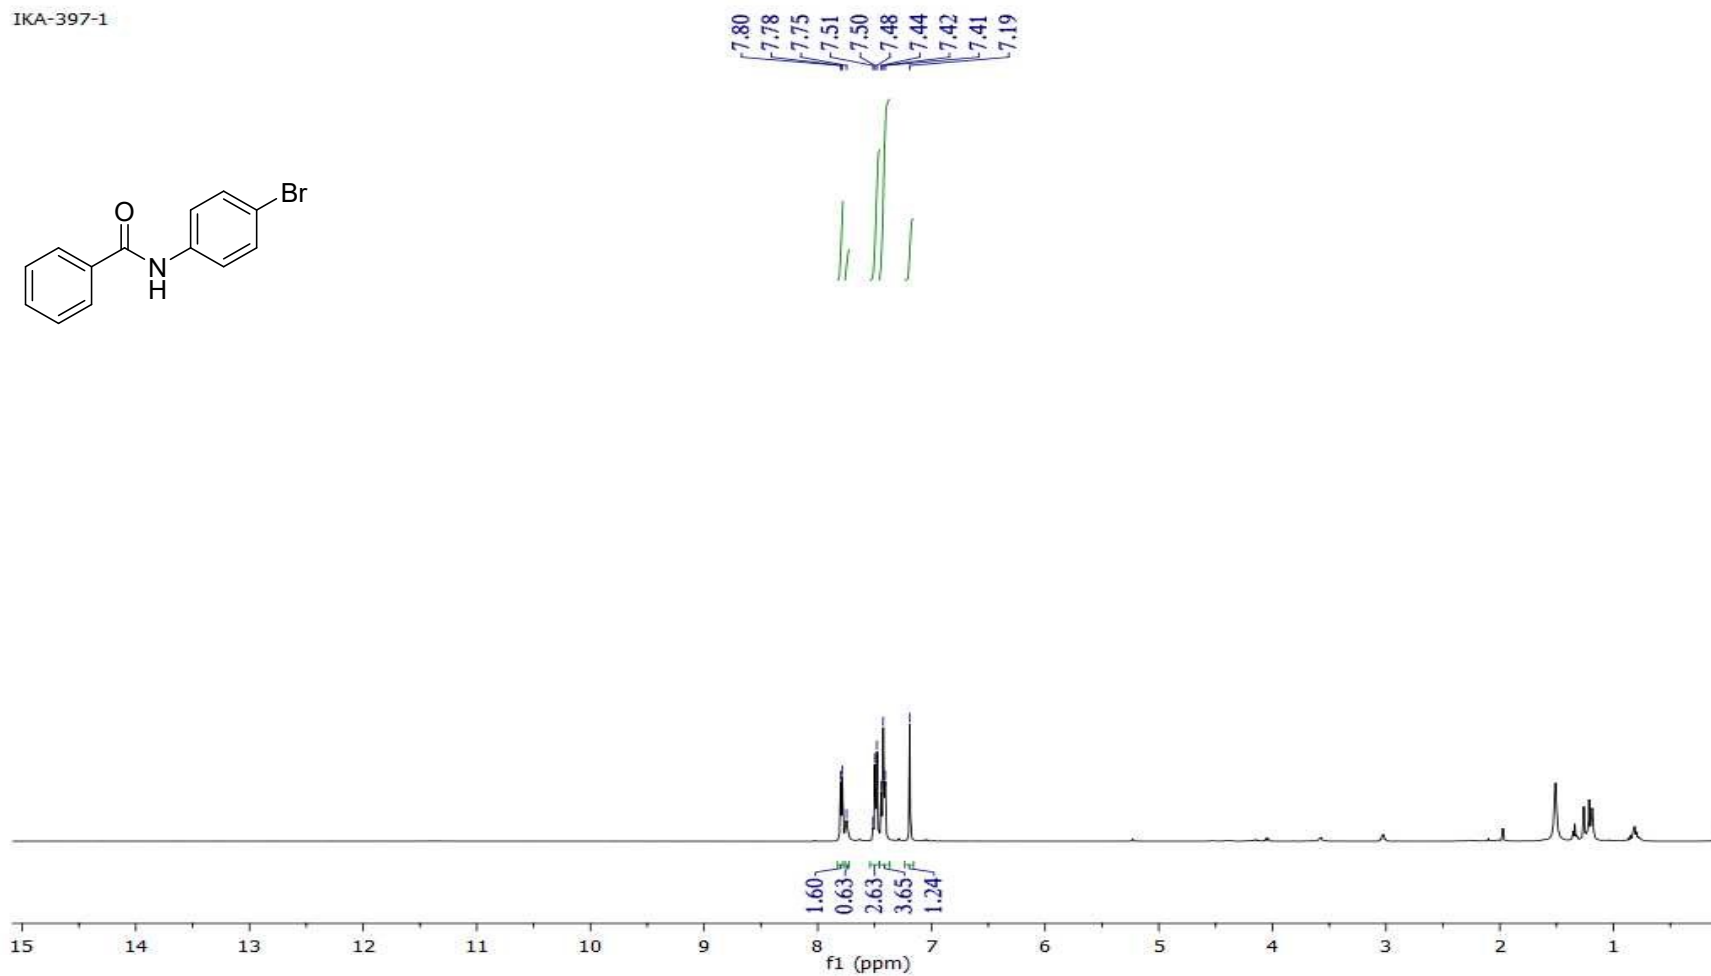

IKA-391-1

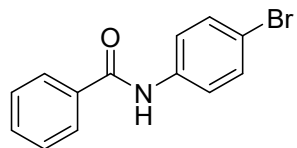

164.62

135.99  
133.61  
131.06  
130.88  
127.86  
125.98  
125.83  
120.68

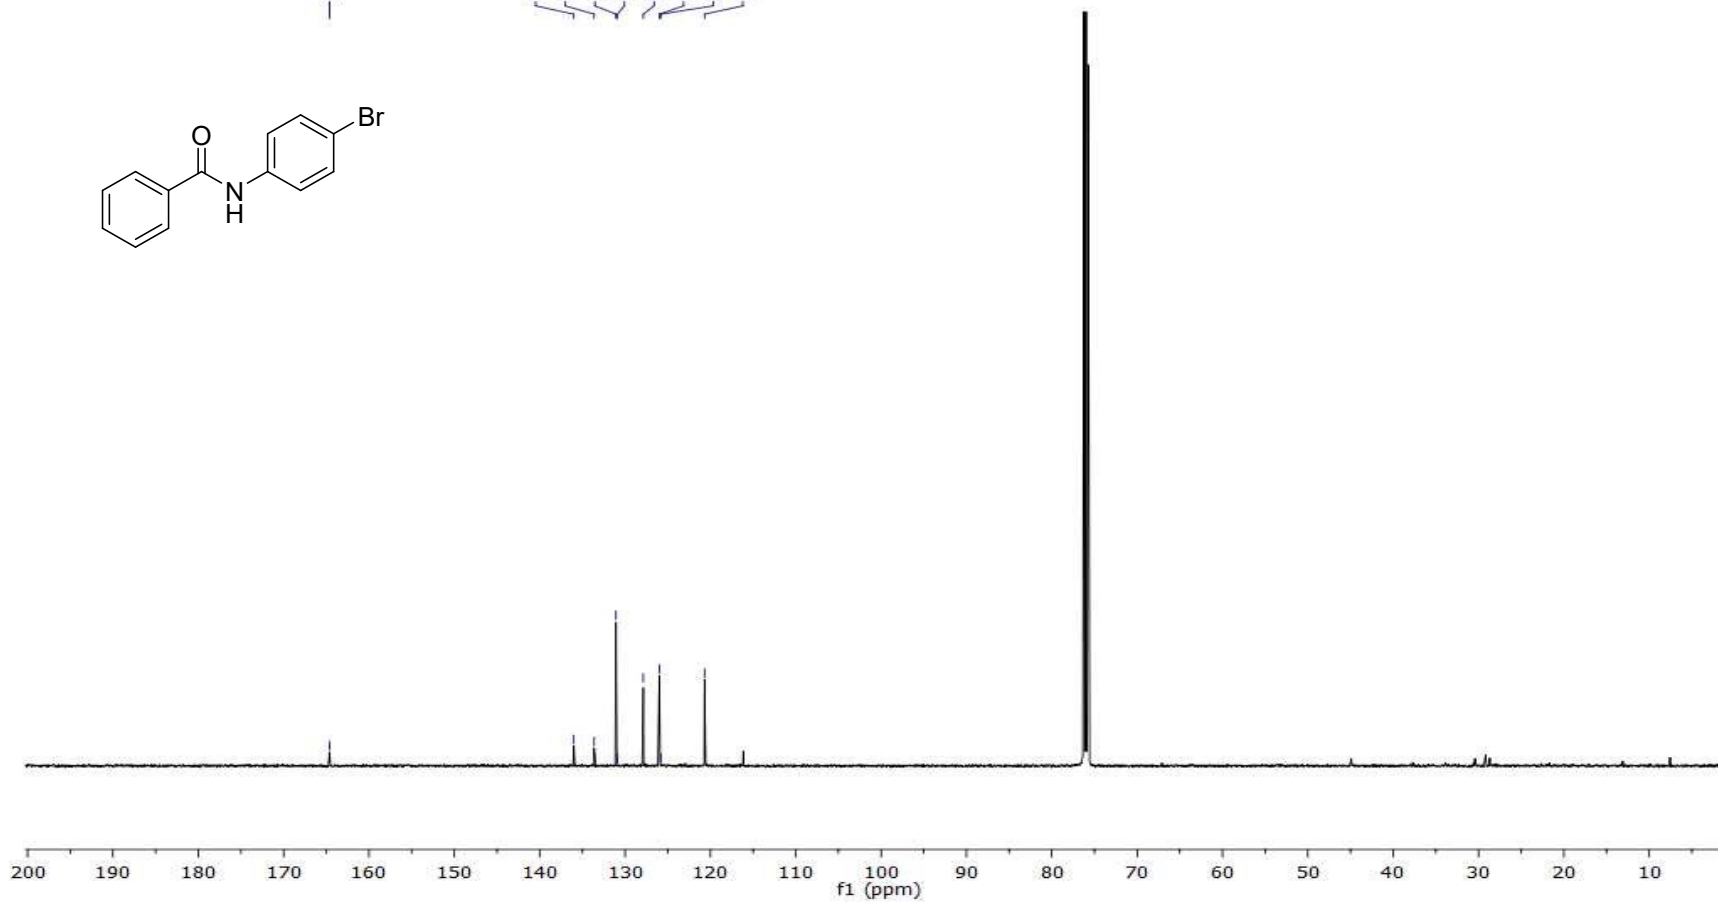

Abundance

Scan 1572 (11.081 min): IKA10 2.D\data.ms

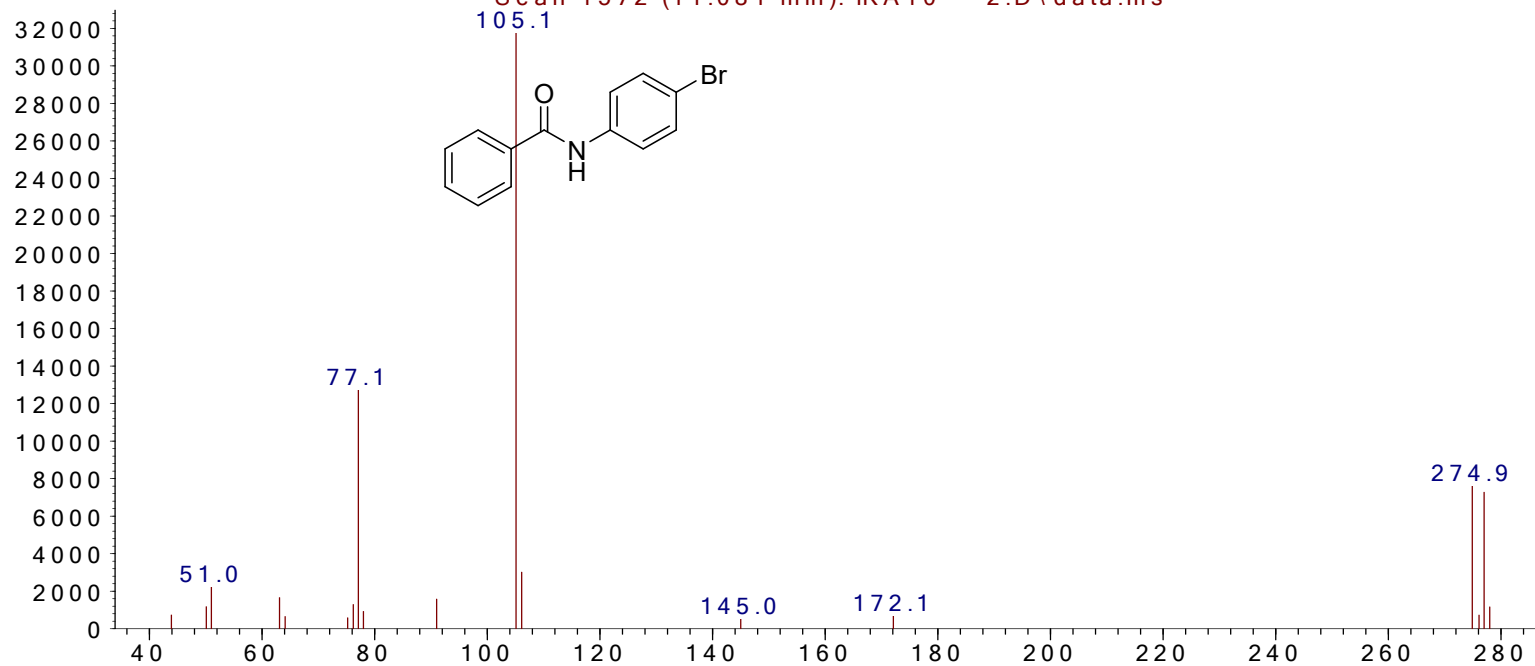

m/z-->

Abundance

Scan 1572 (11.081 min): IKA10 2.D\data.ms

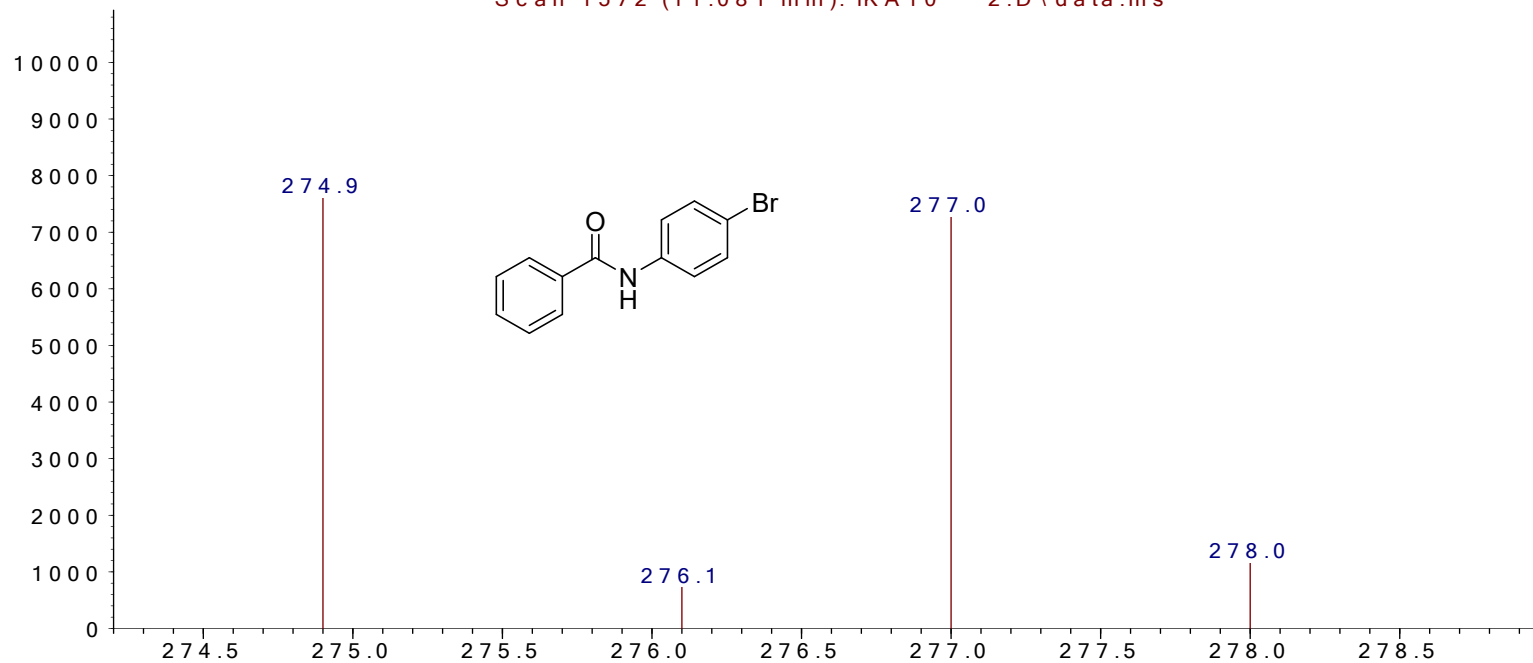

m/z-->

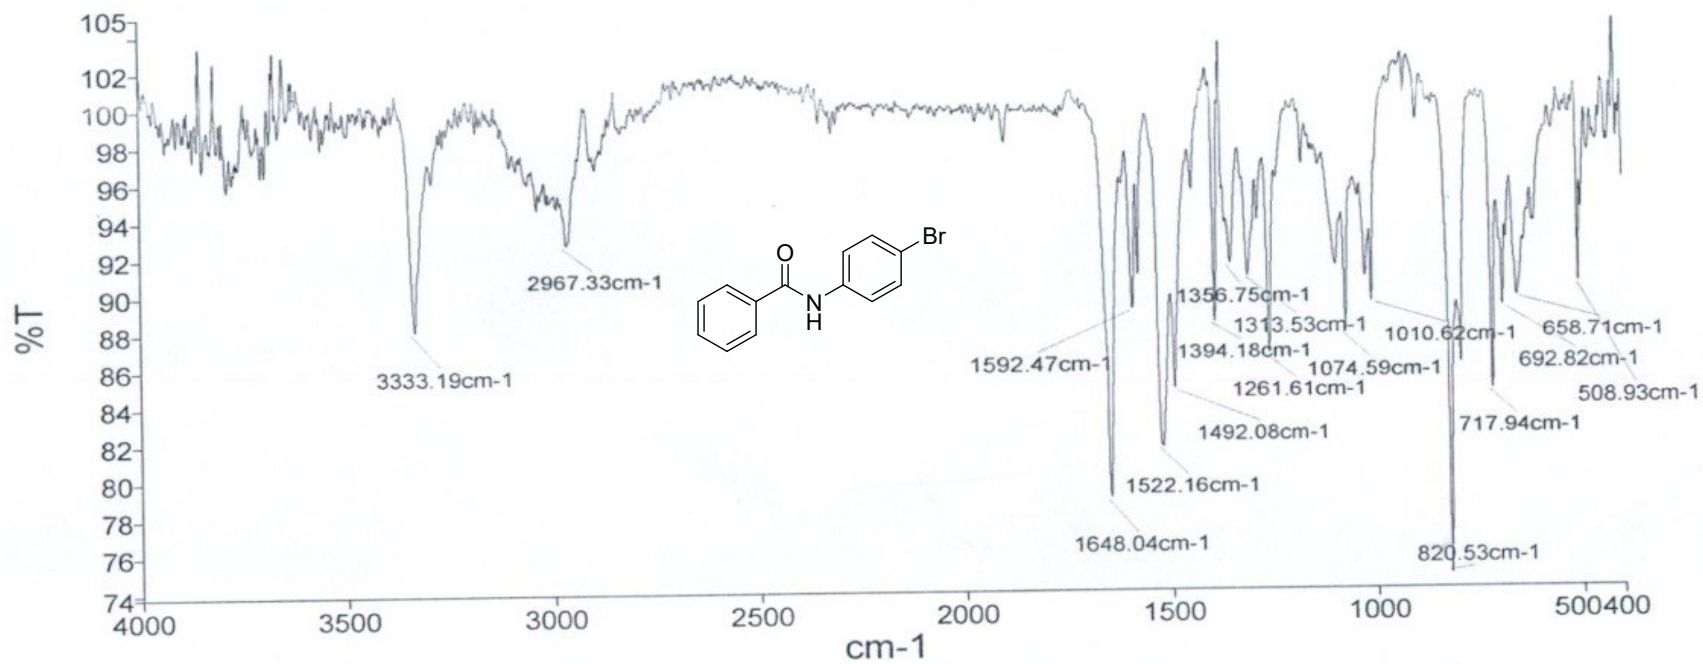

$^1\text{H}$  NMR,  $^{13}\text{C}$  NMR, mass and IR spectrum of *N*-(2,6-dimethylphenyl)benzamide (3n)

IKA-397-2

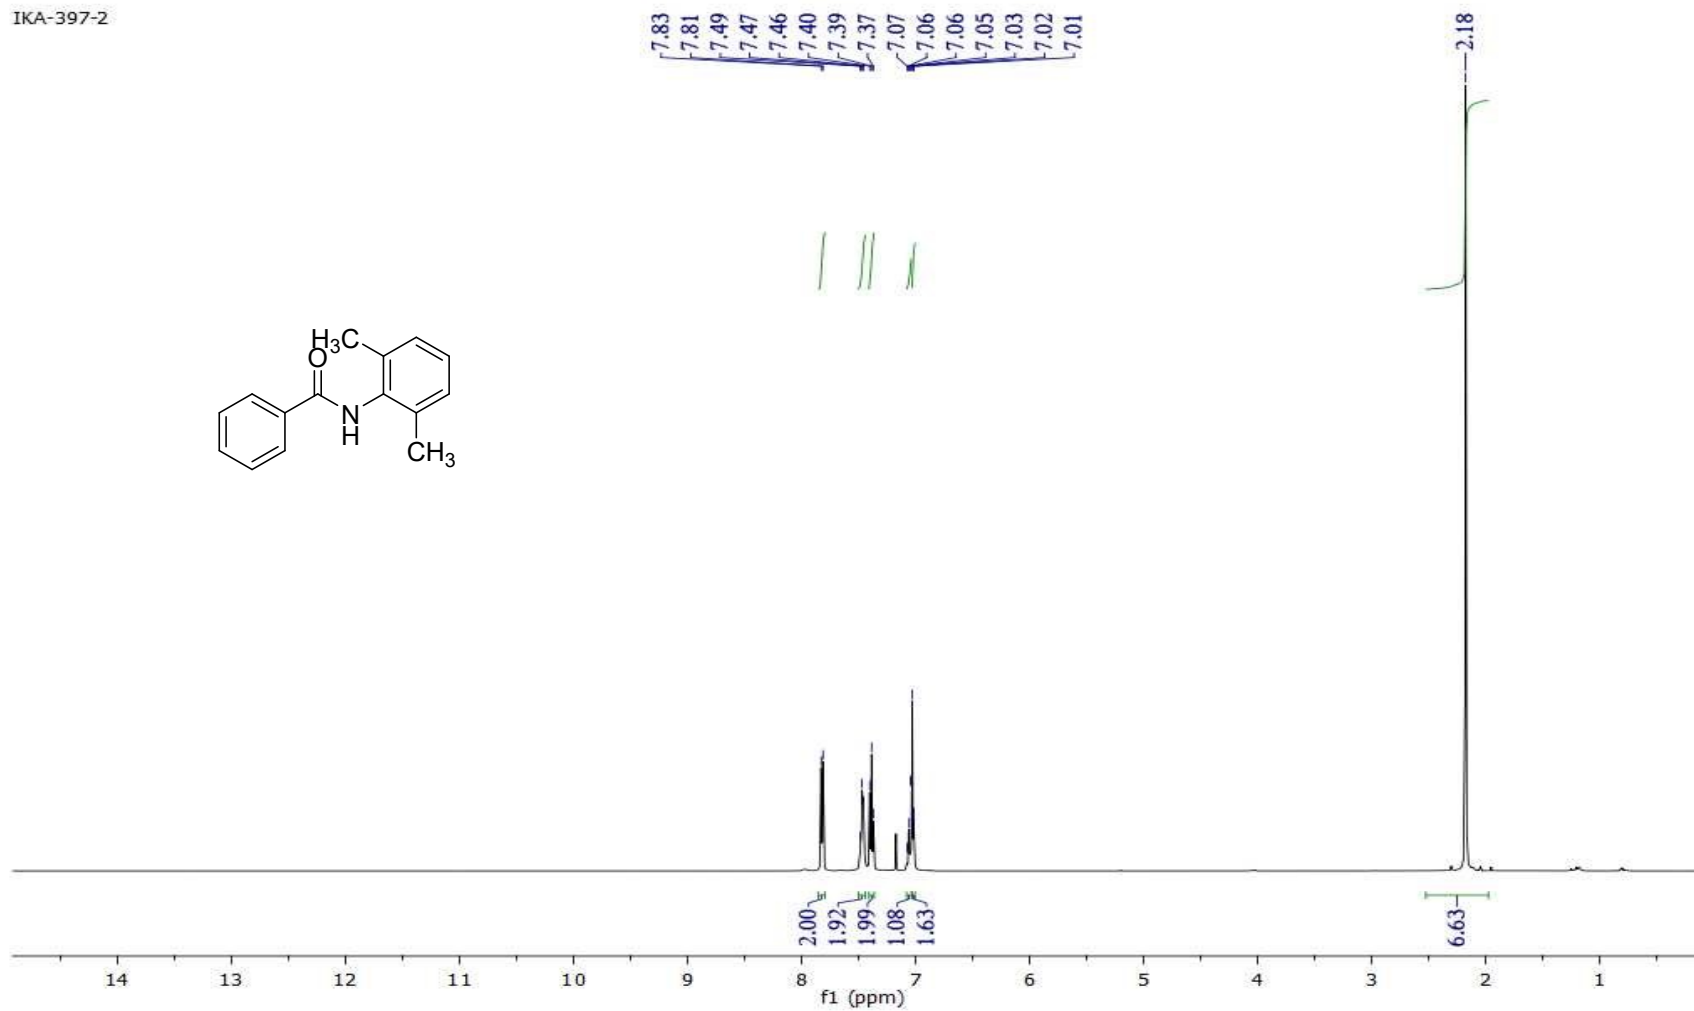



IKA397-2

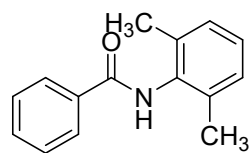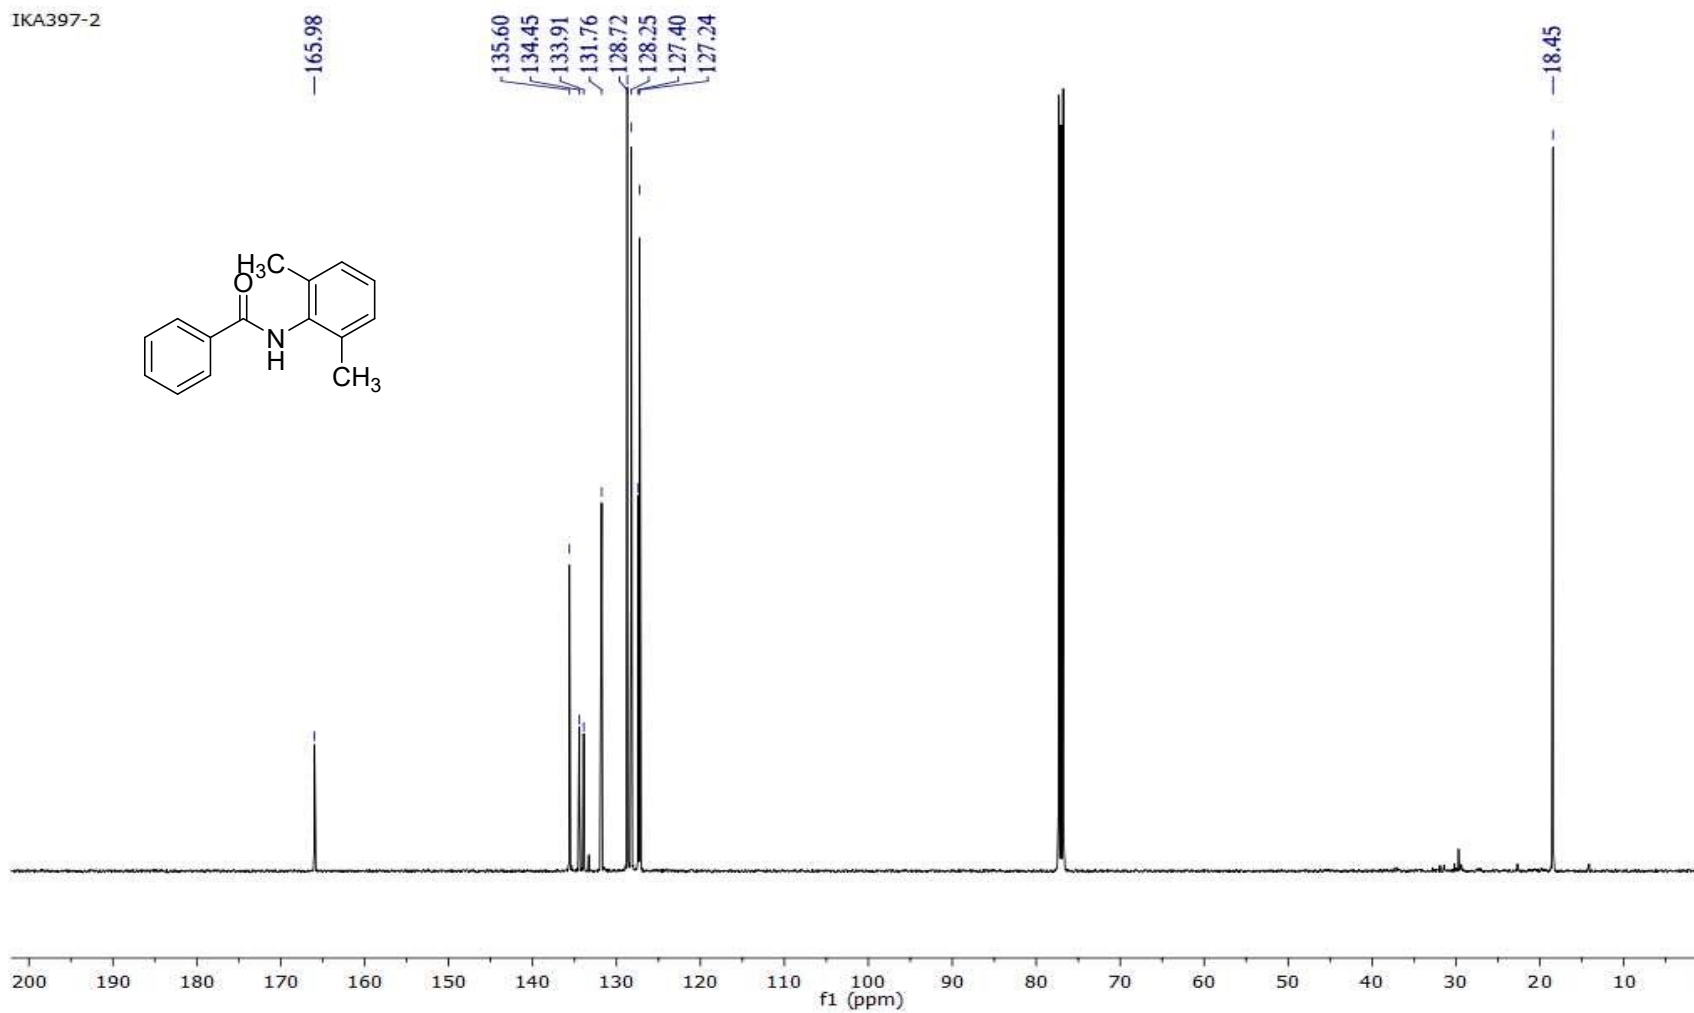

Abundance

Scan 1357 (9.714 min): IKA11 2.D\data.ms

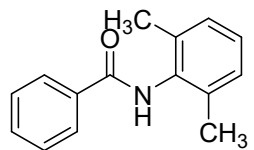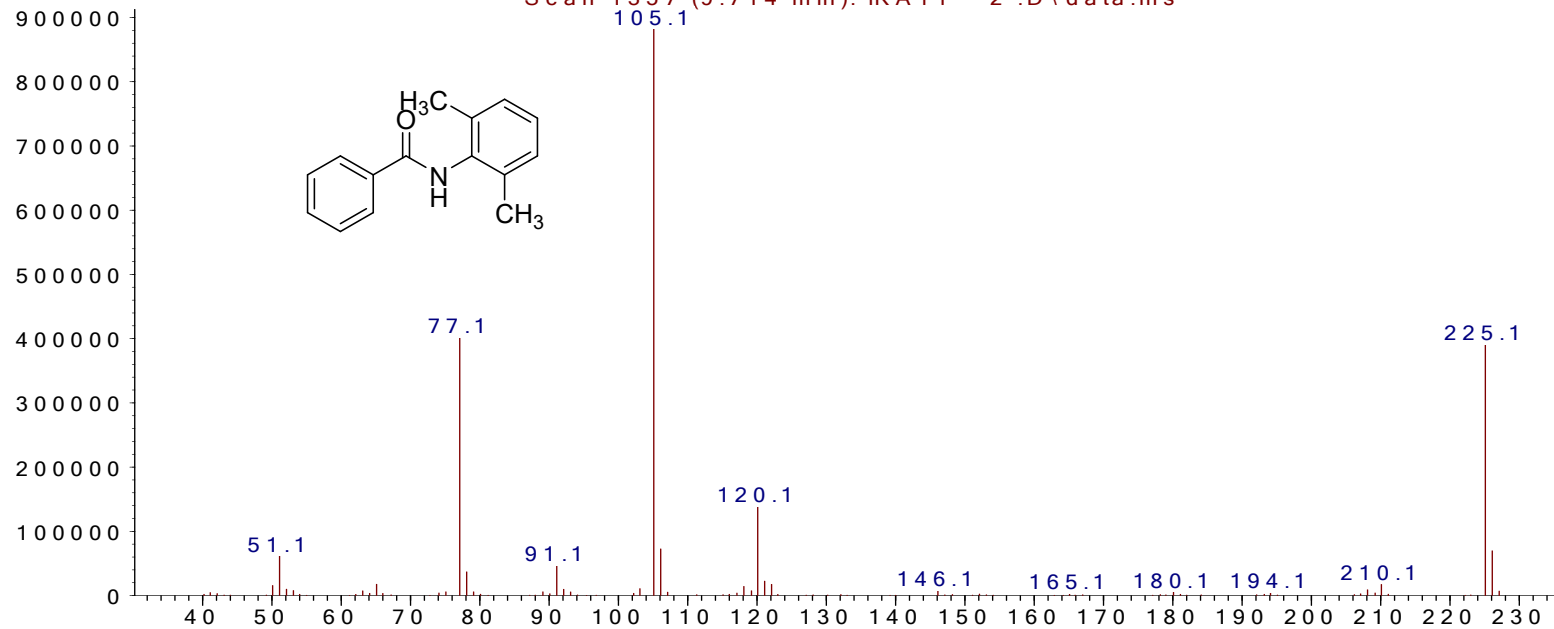

m/z-->

Abundance

Scan 1357 (9.714 min): IKA11 2.D\data.ms

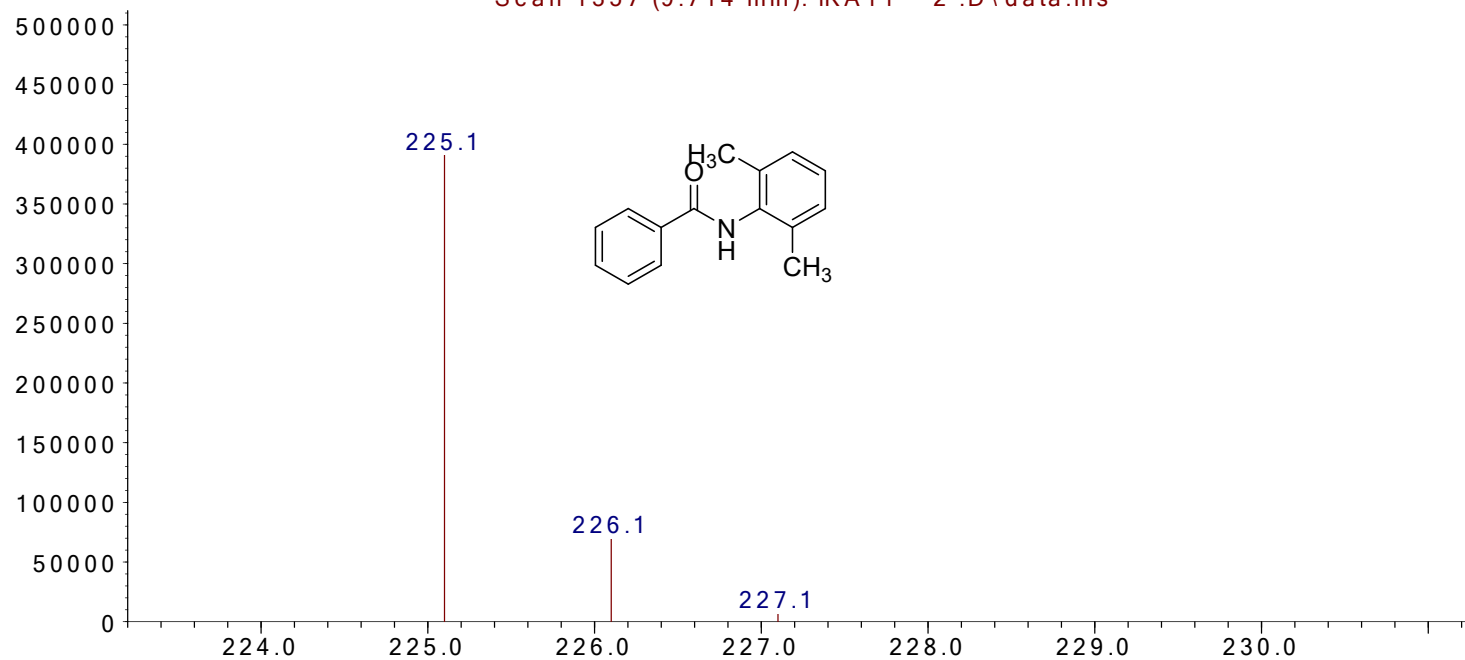

m/z-->

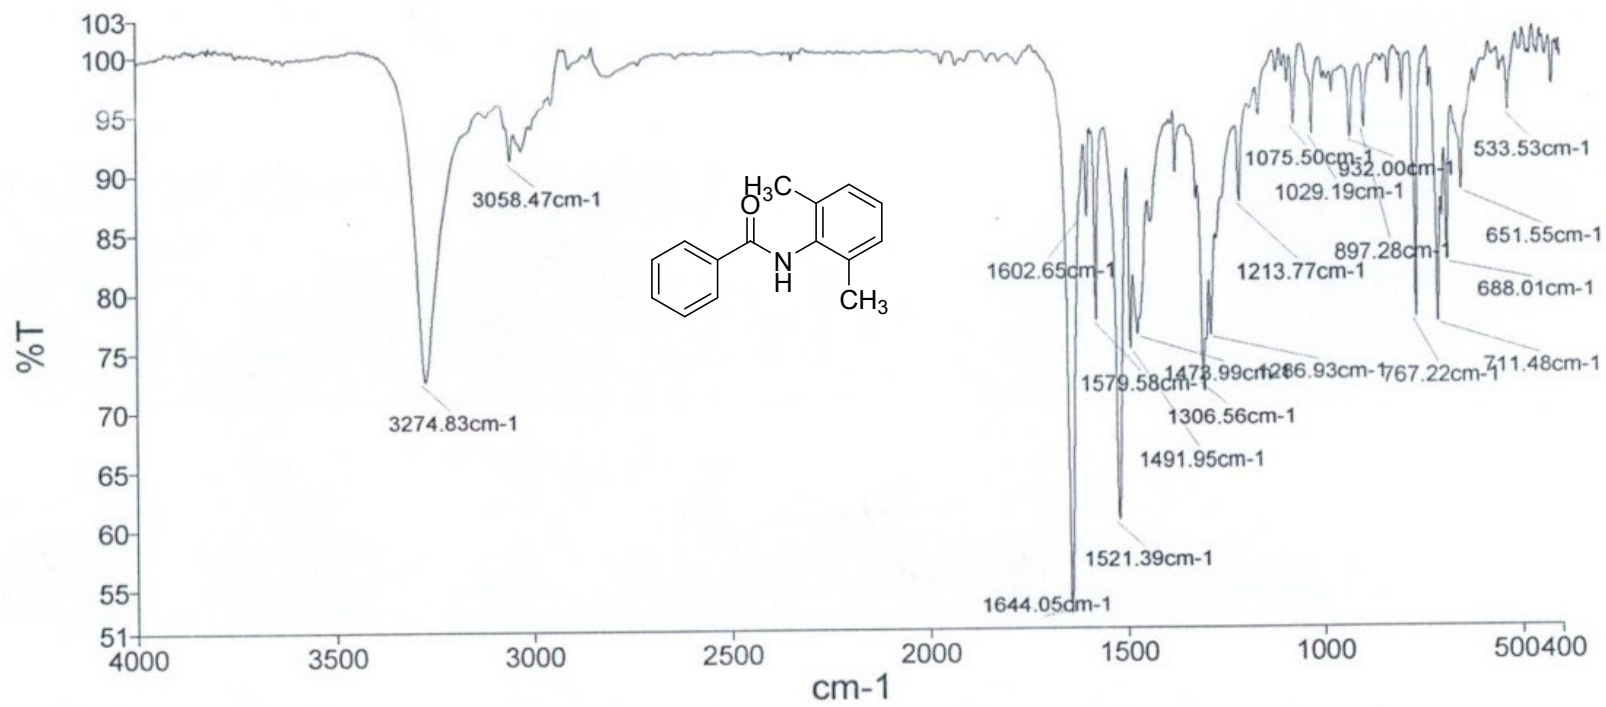

$^1\text{H}$  NMR,  $^{13}\text{C}$  NMR, mass and IR spectrum of *N*-(4-chloro-3-nitrophenyl)benzamide (3m)

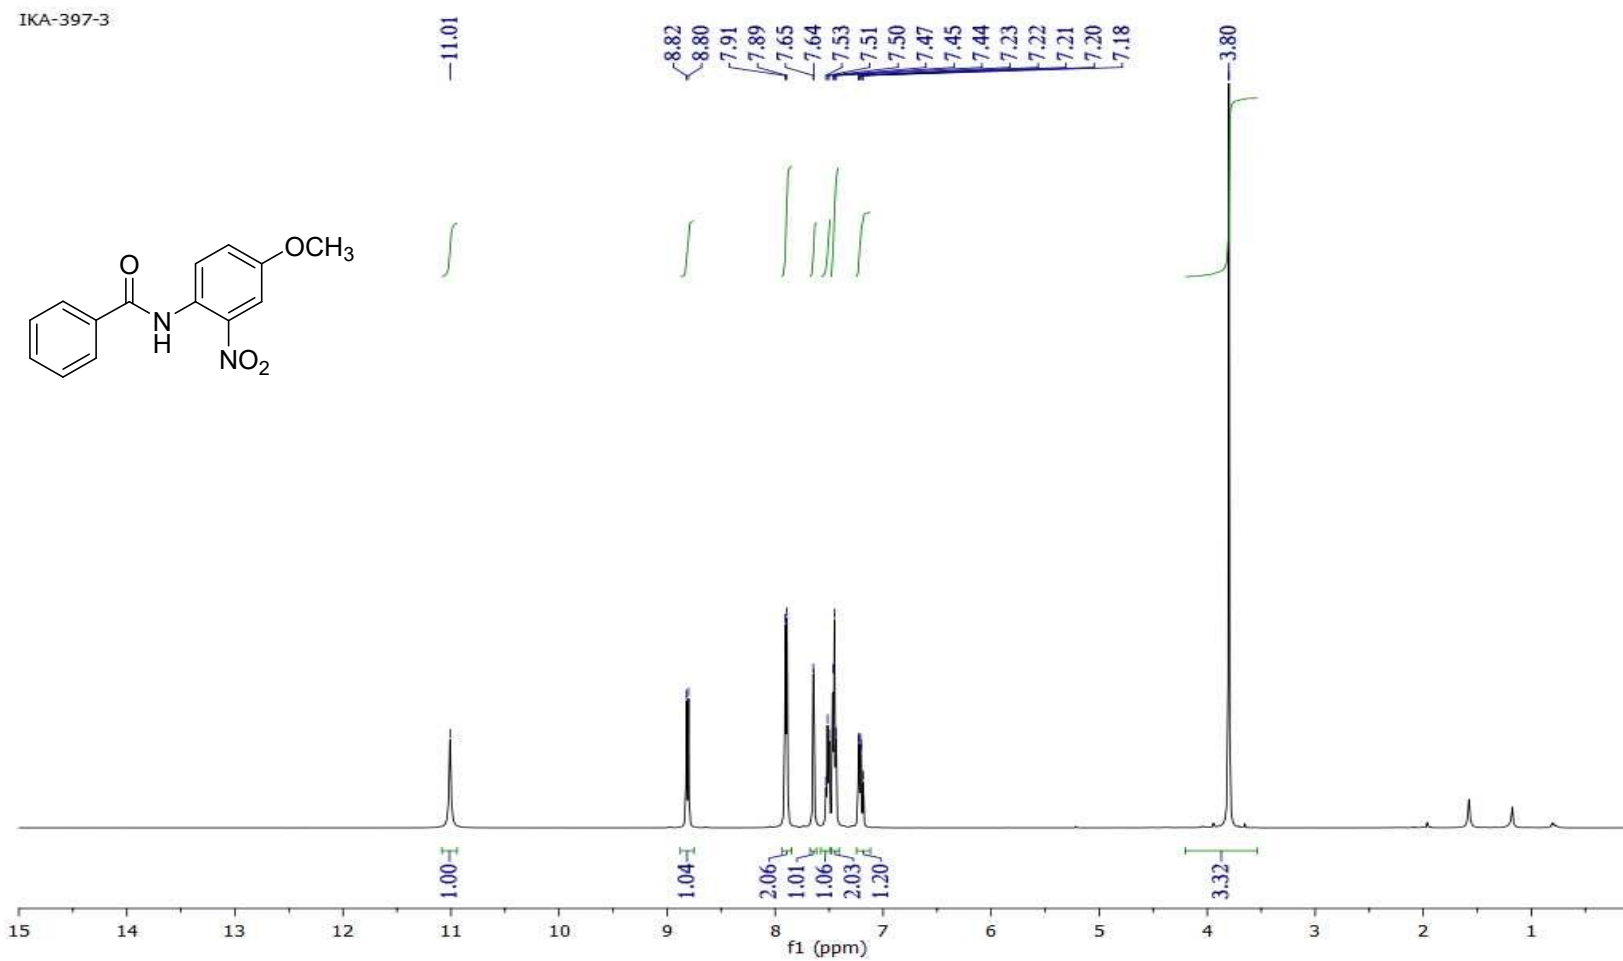

IKA-391-3

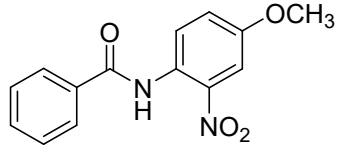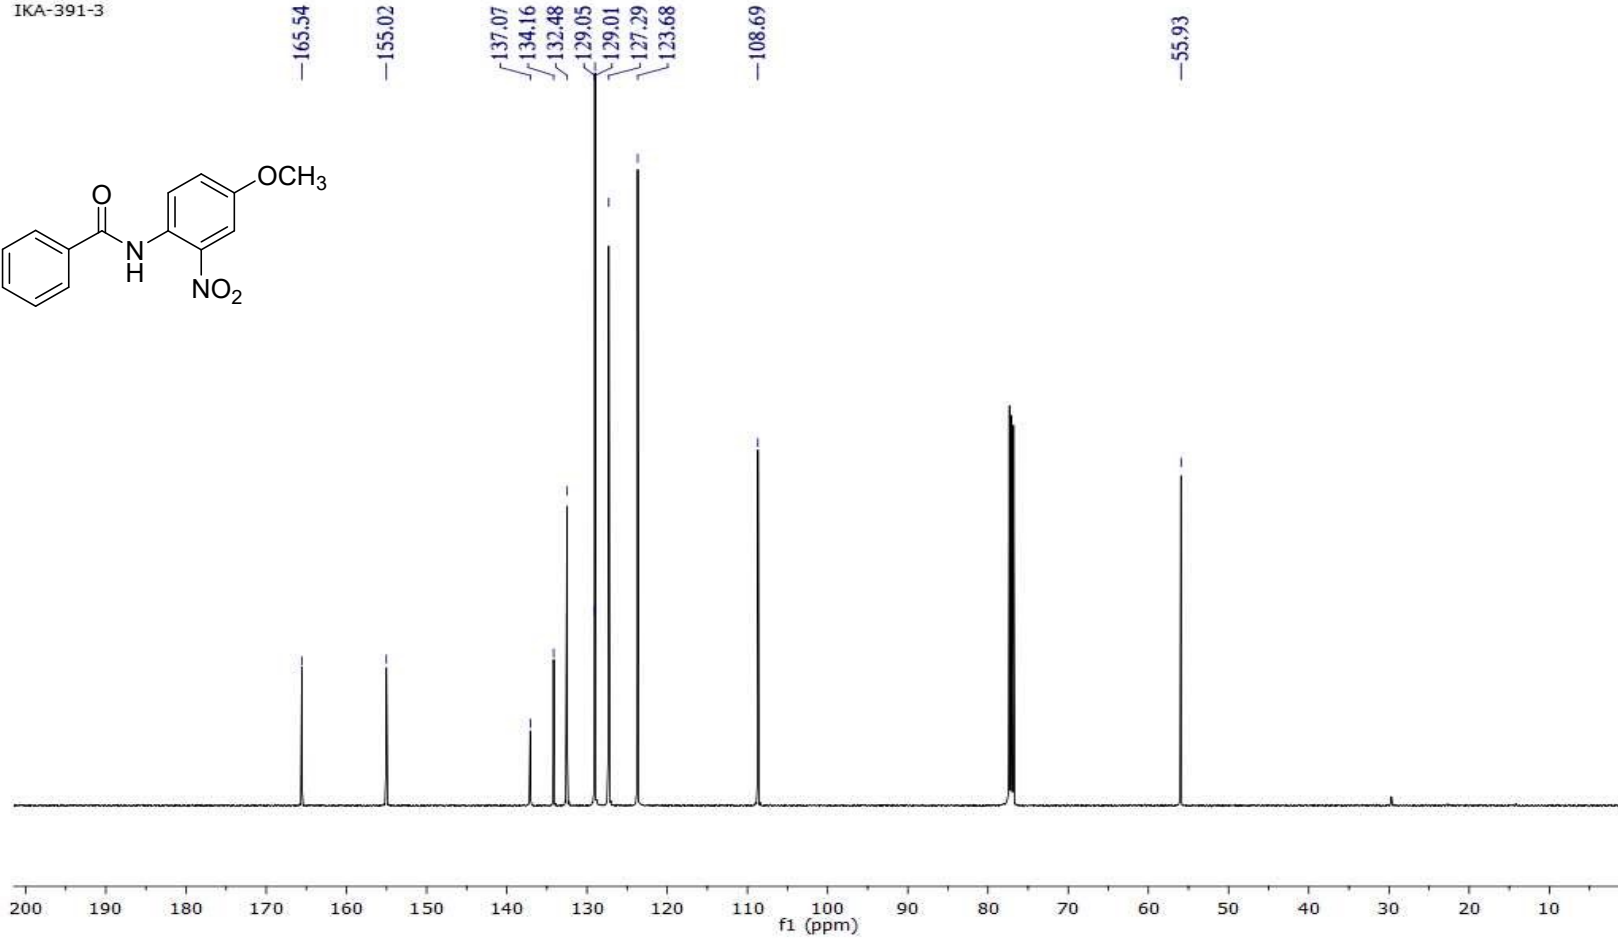

Abundance

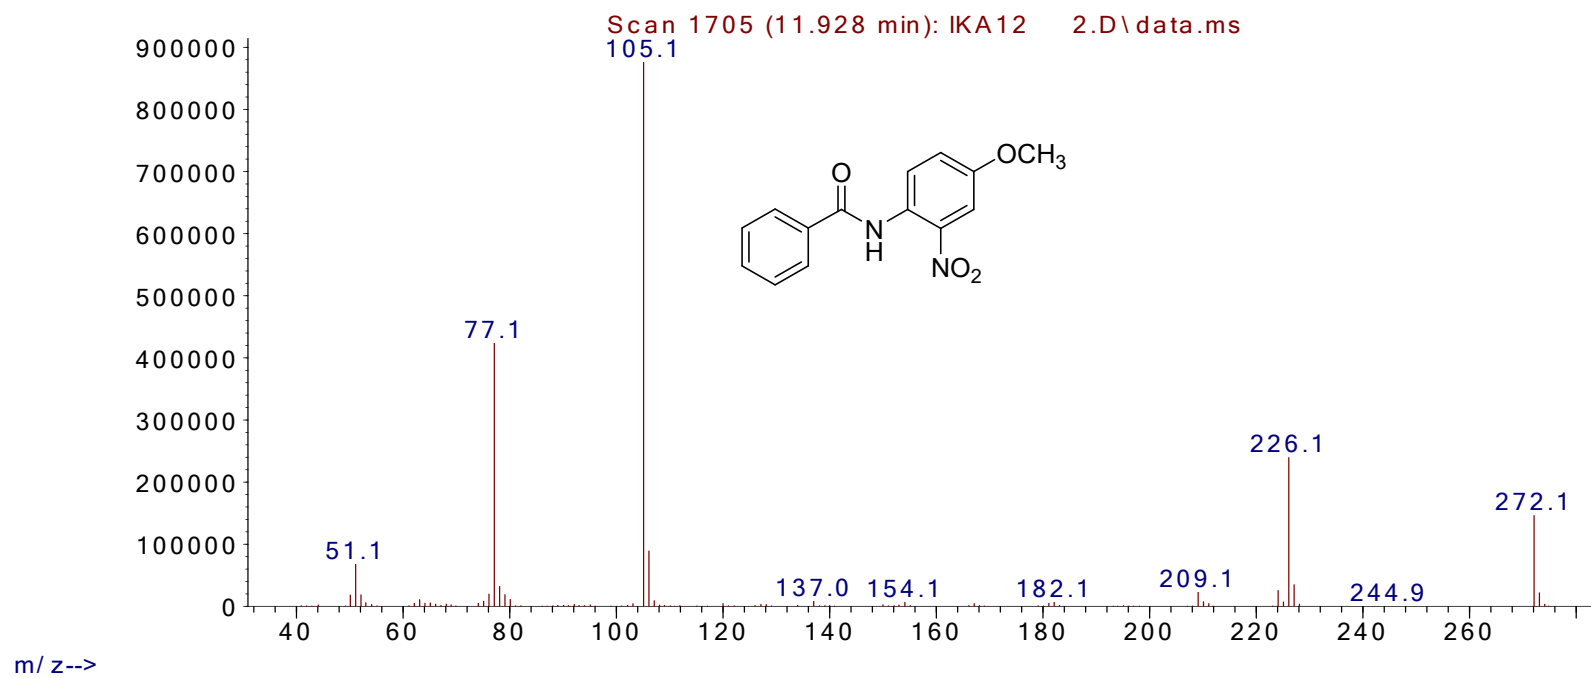

Abundance

Scan 1705 (11.928 min): IKA12 2.D\data.ms

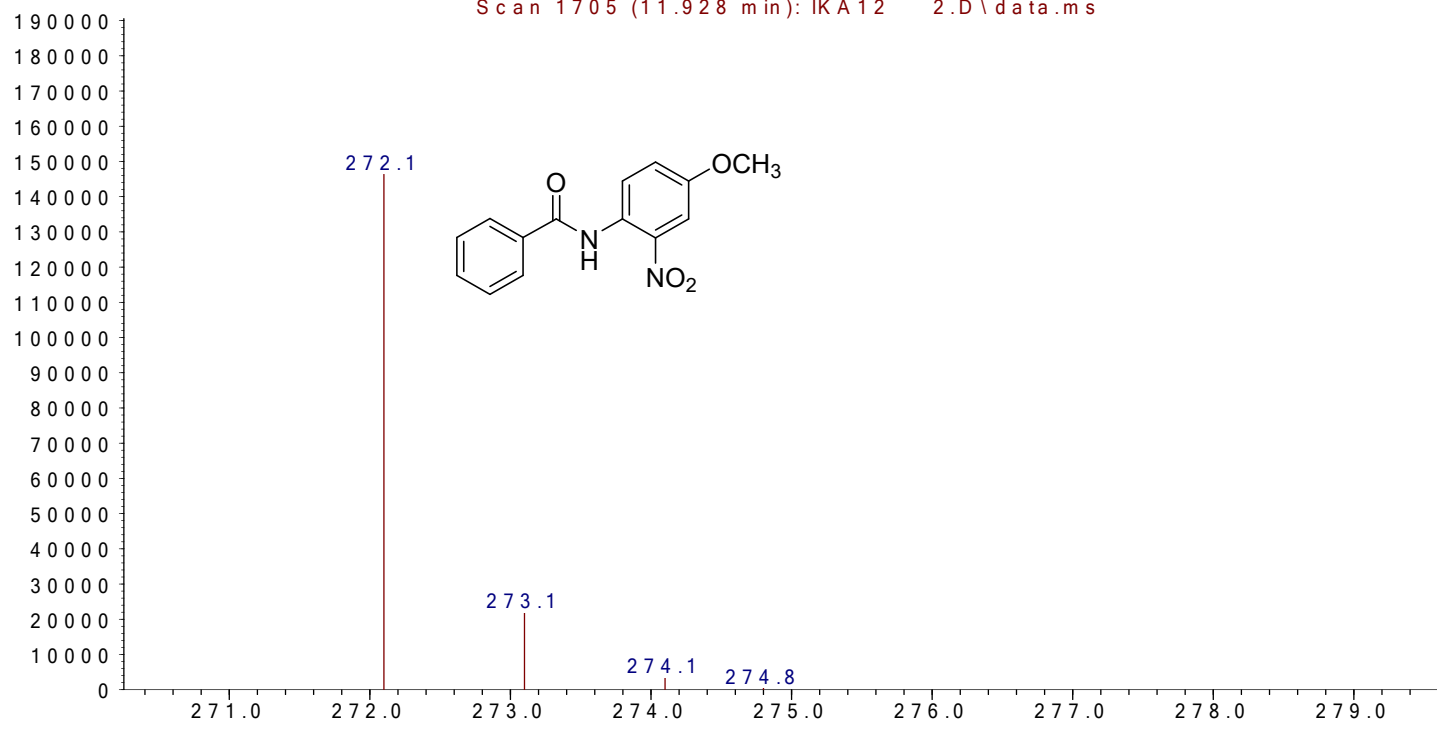



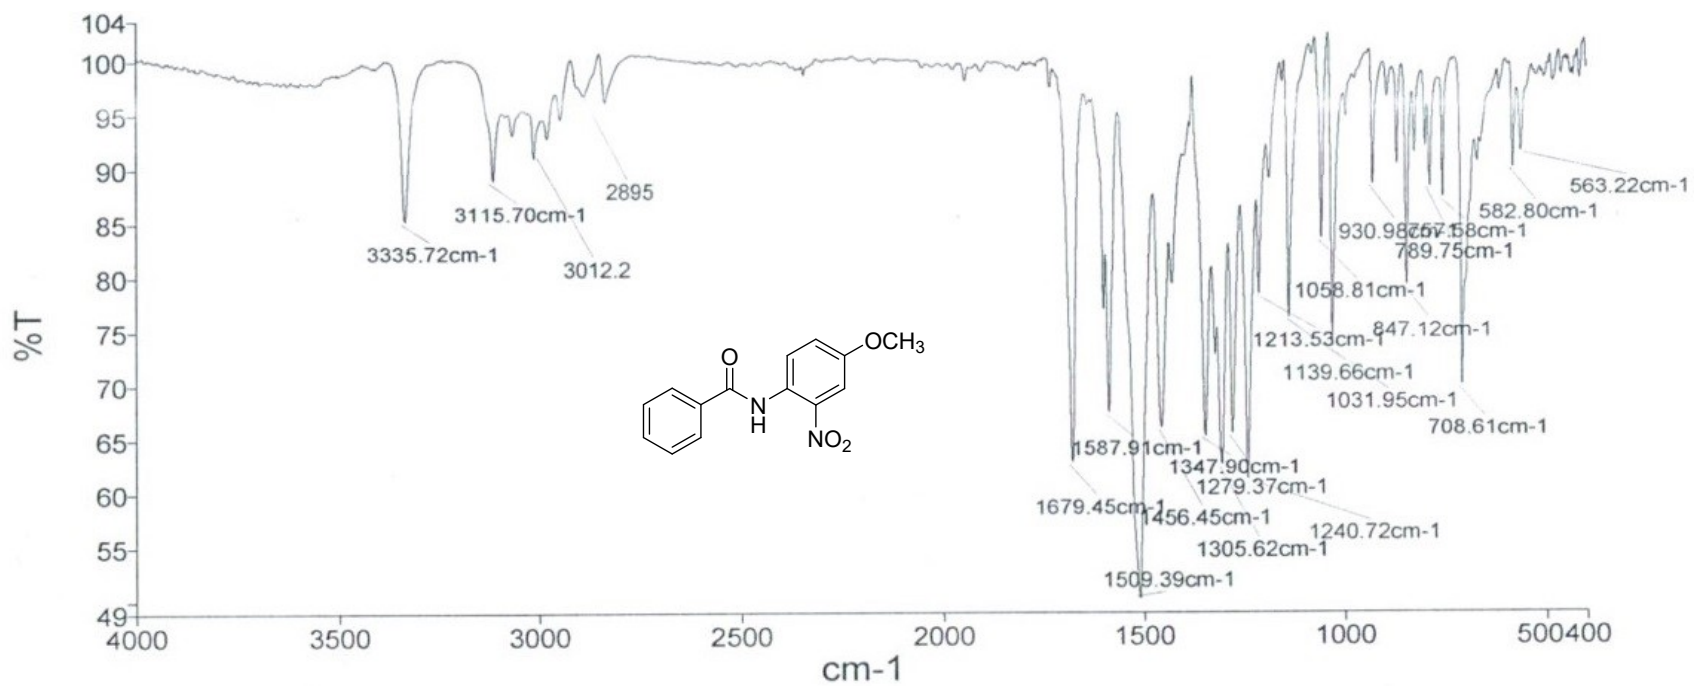

<sup>1</sup>H NMR, <sup>13</sup>C NMR, mass and IR spectrum of *N*-(2-methyl-4-nitrophenyl)benzamide (31)

IKA-397-4

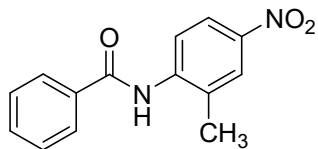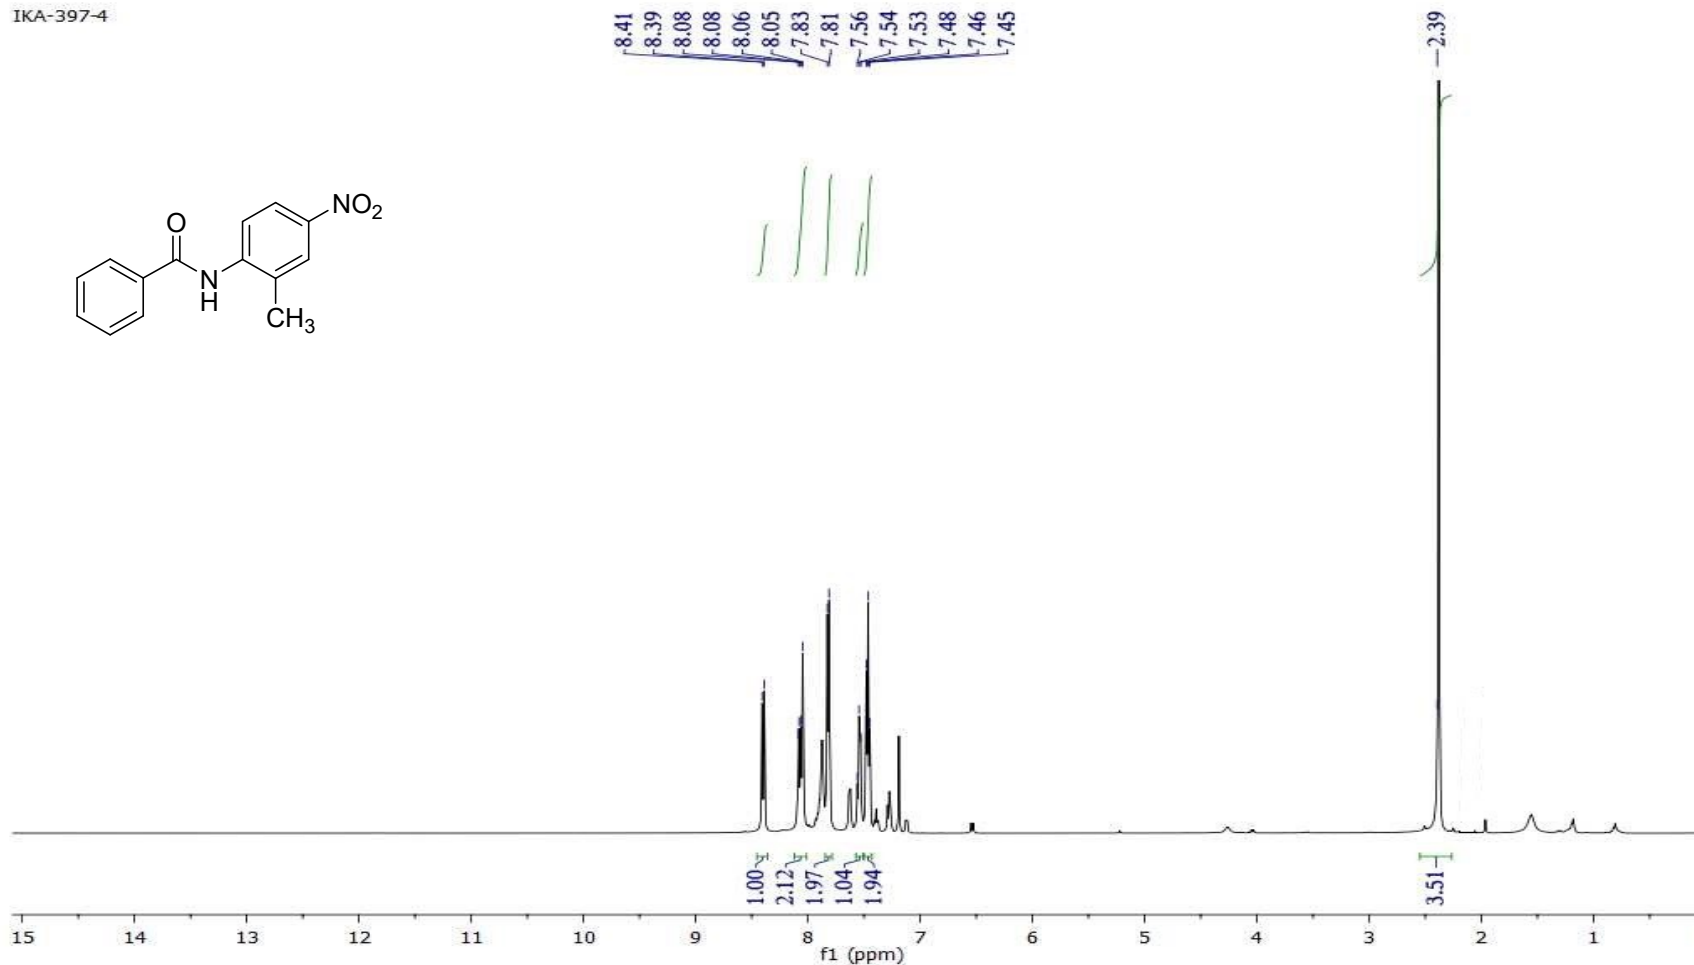

IKA-391-4

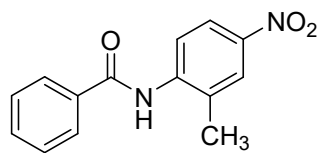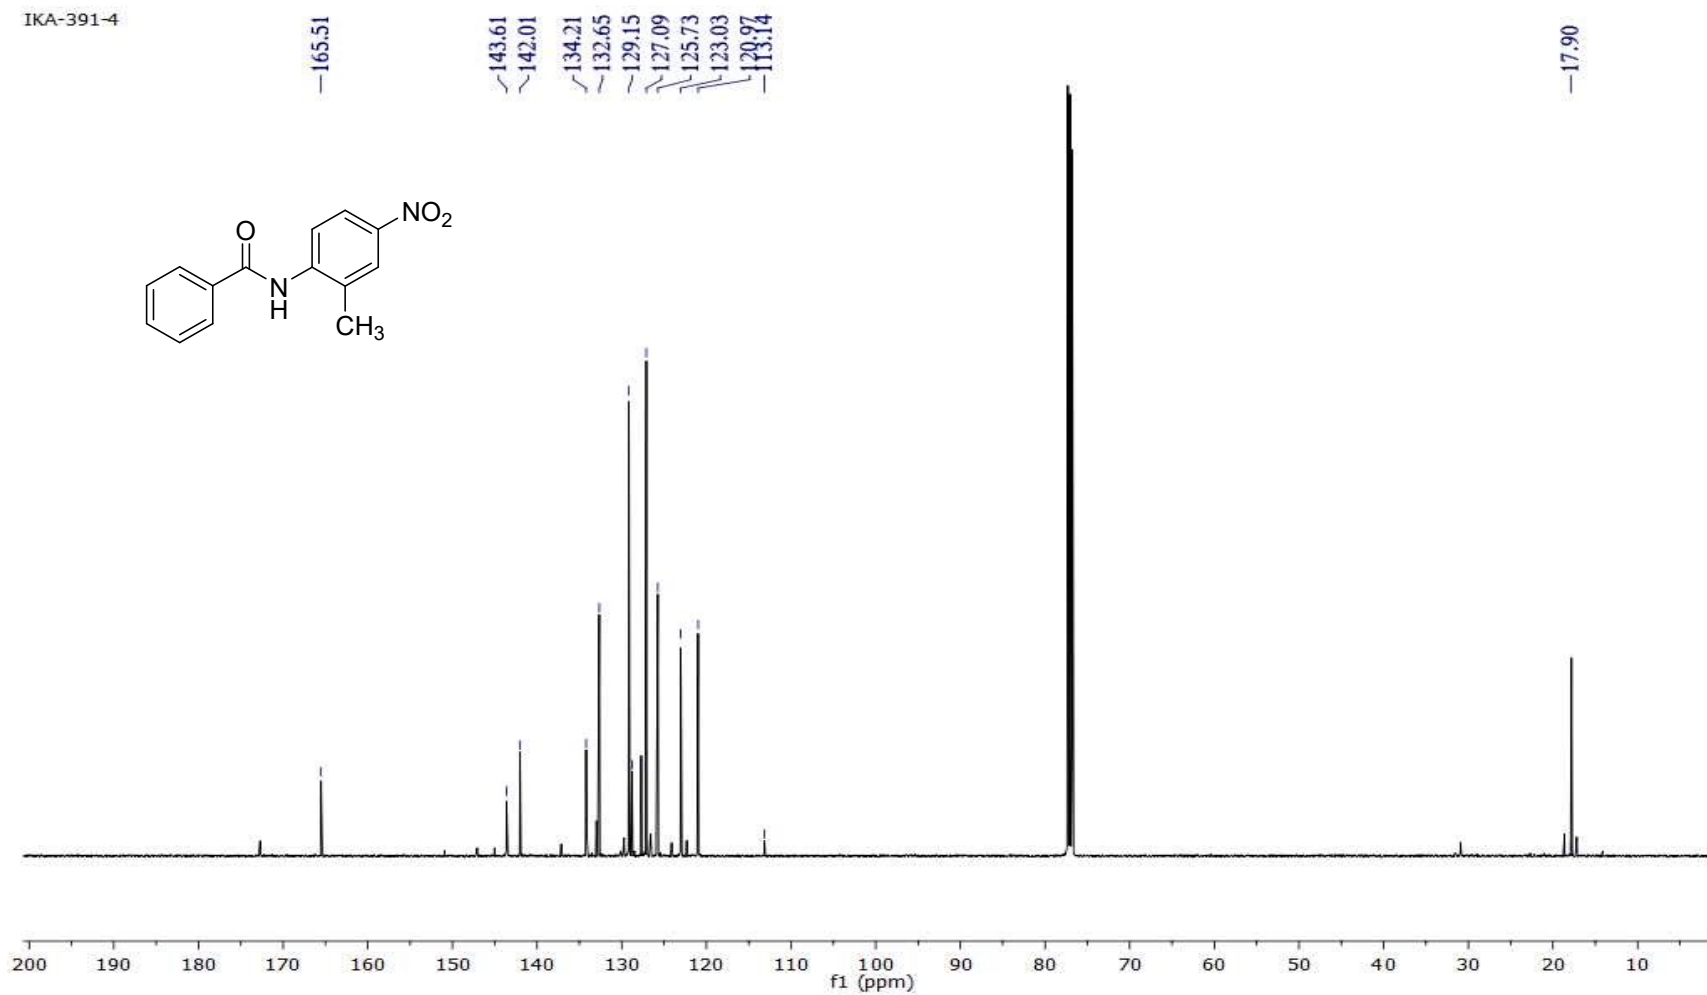

Abundance

Scan 1774 (12.367 min): IKA 13 2.D\data.ms  
105.1

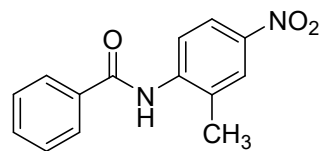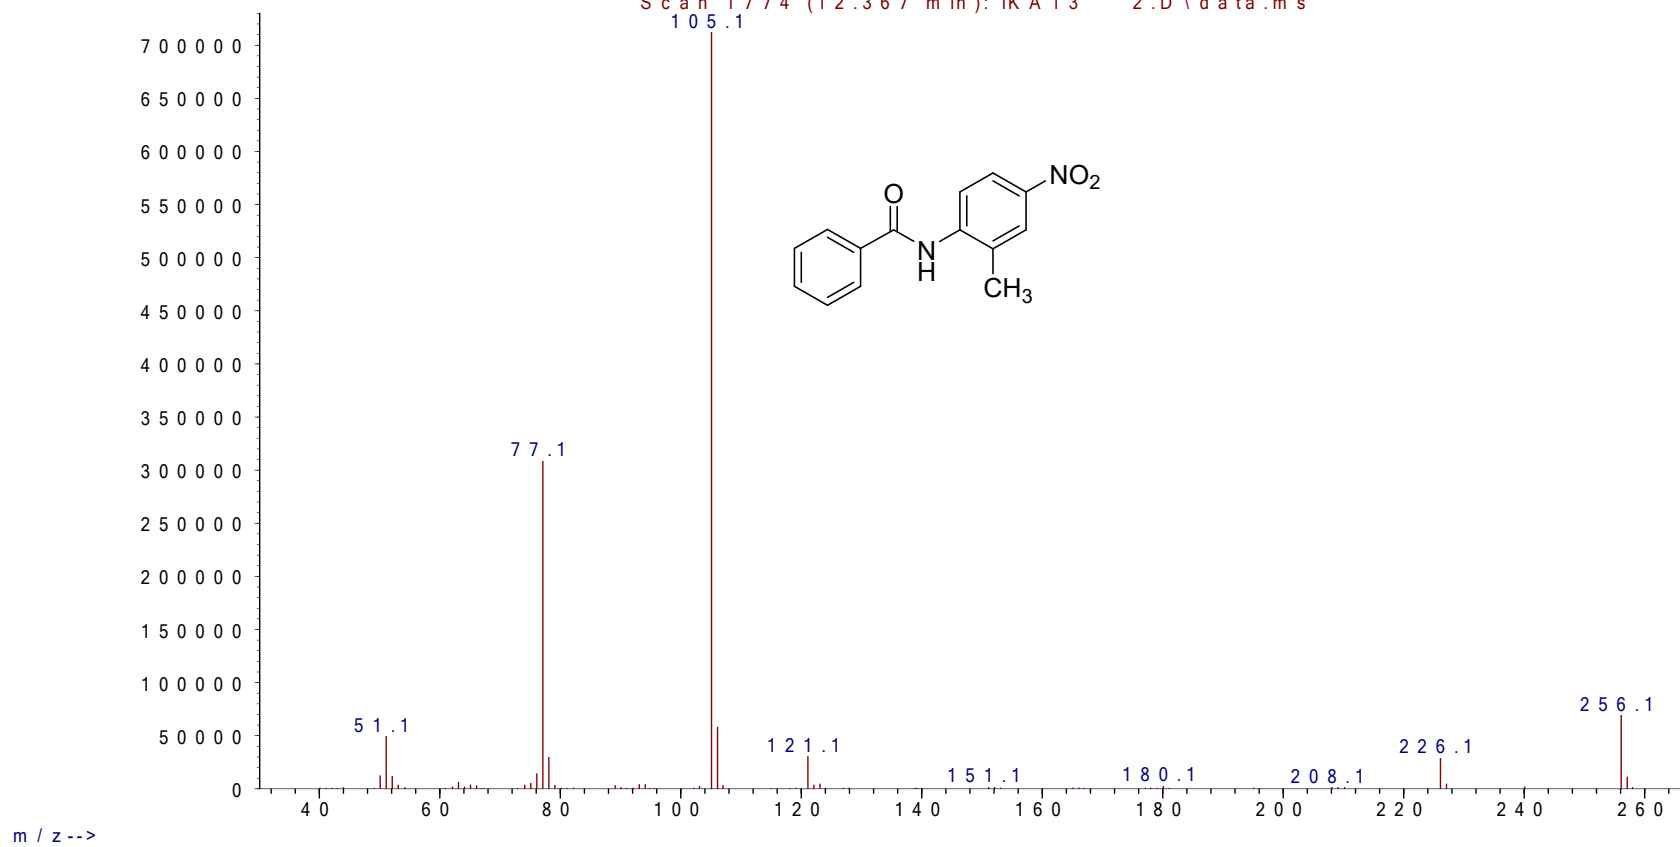

Abundance

Scan 1774 (12.367 min): IKA13 2.D\data.ms

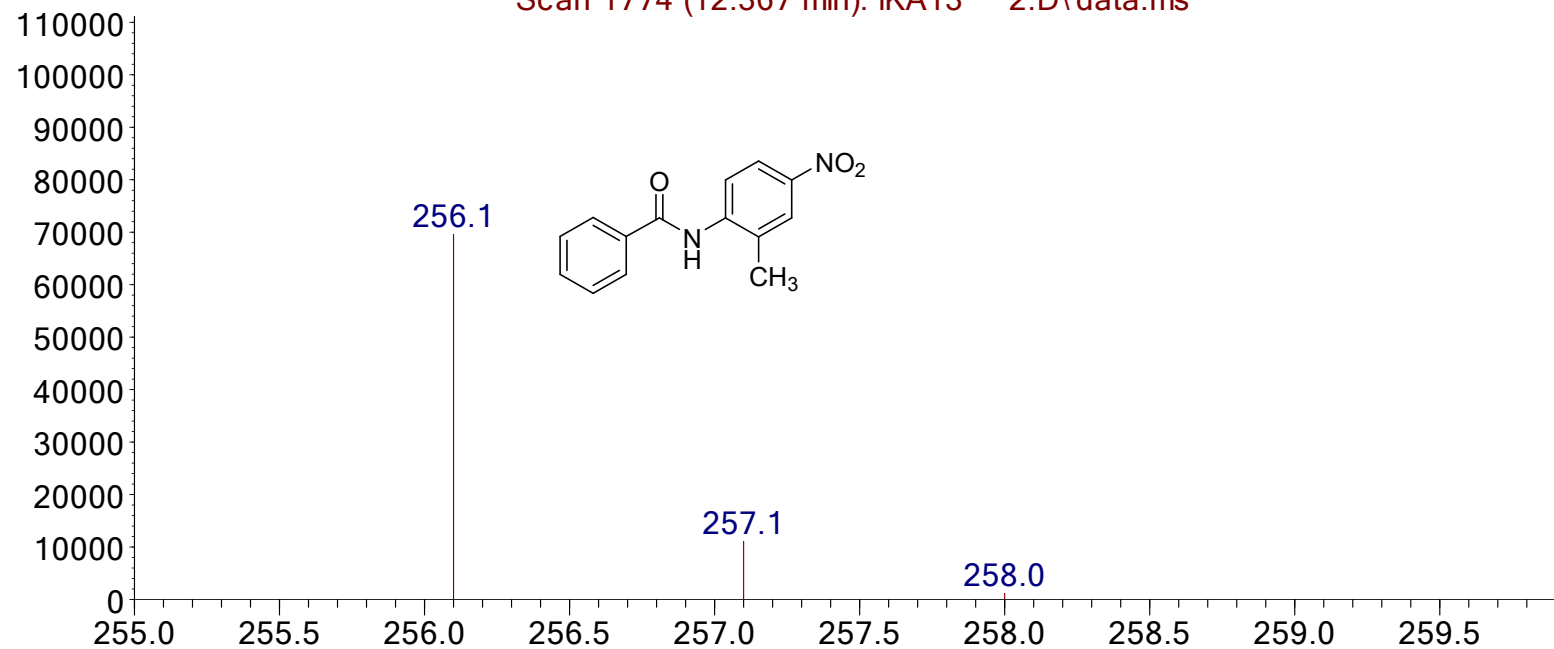

m/z-->

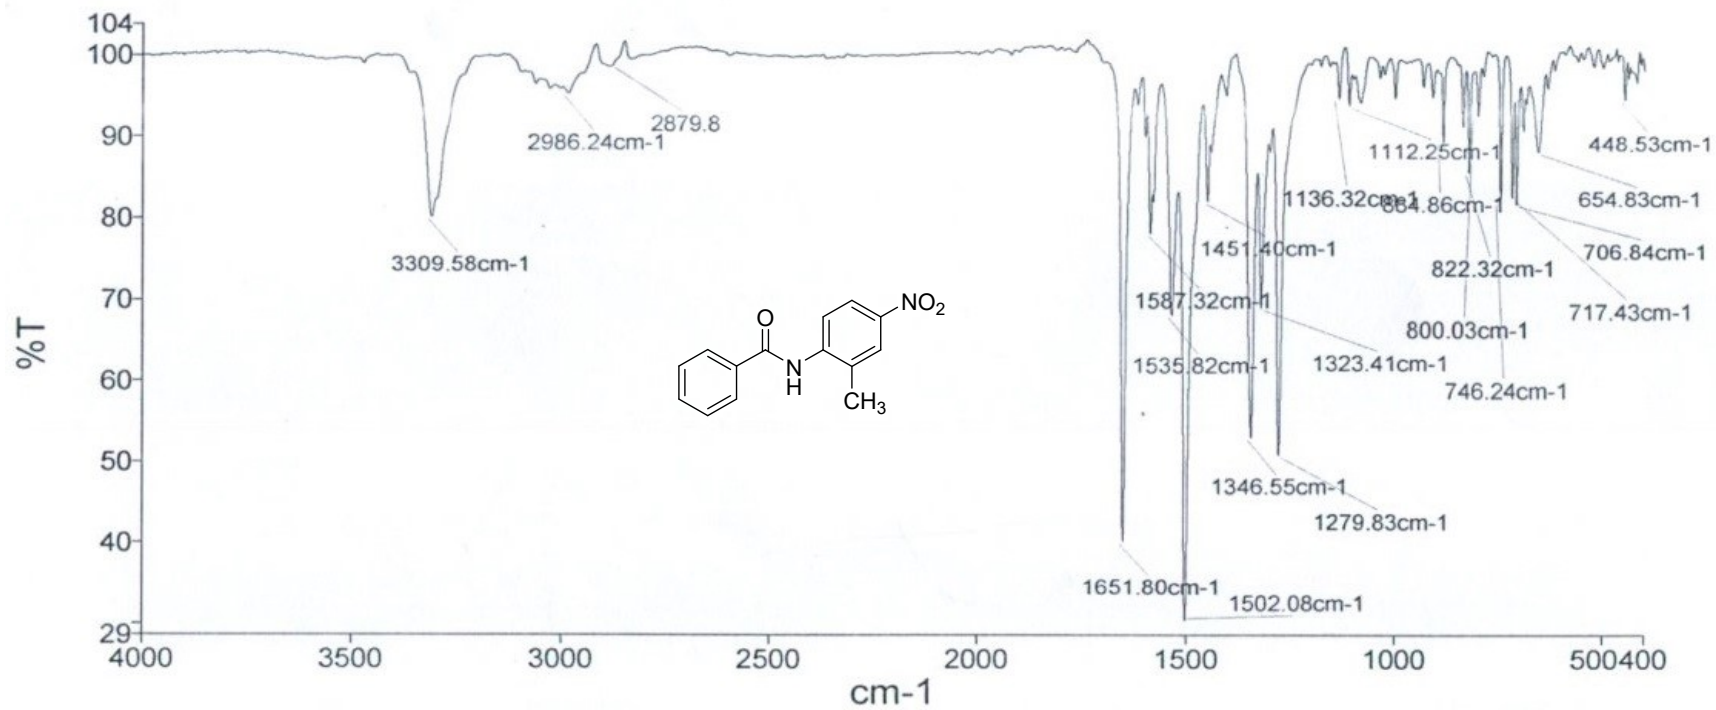

<sup>1</sup>H NMR, <sup>13</sup>C NMR, mass and IR spectrum of *N*-(naphthalen-1-yl)benzamide (3o)

IKA-397-5

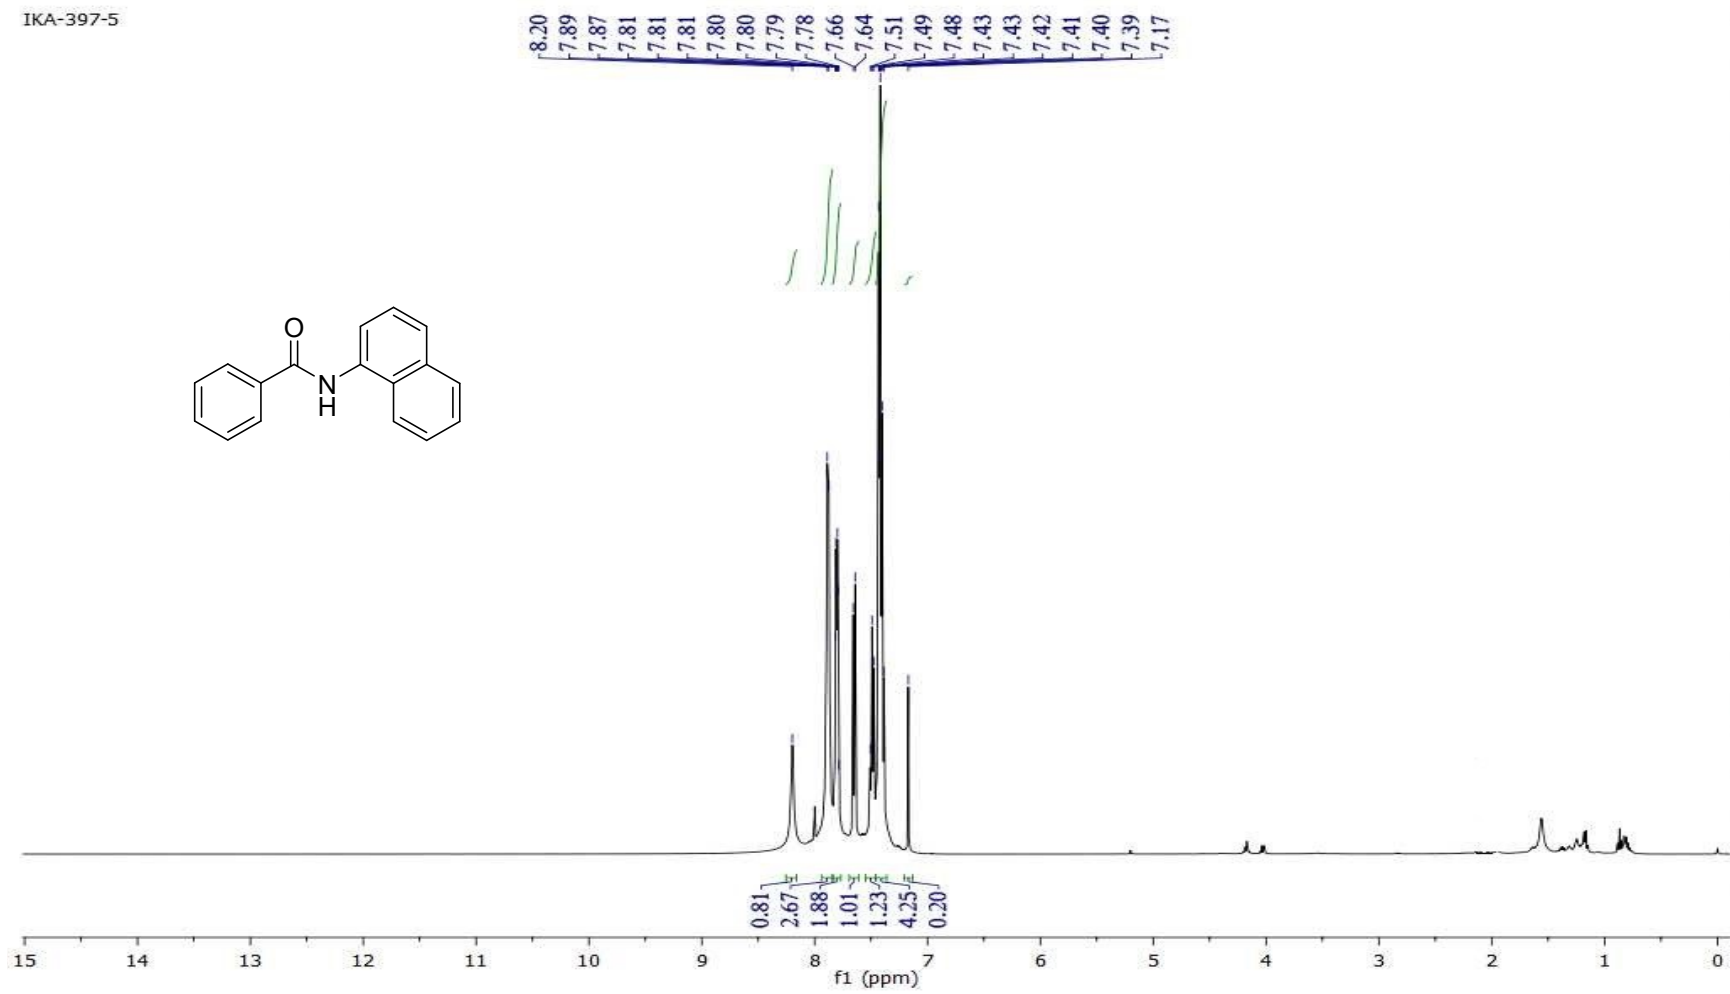

IKA-391-5

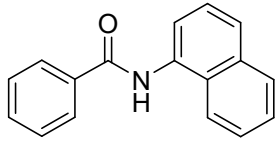

166.34

134.85  
134.19  
131.97  
128.88  
128.85  
127.24  
126.43  
126.17  
126.08  
125.79  
121.38  
120.79

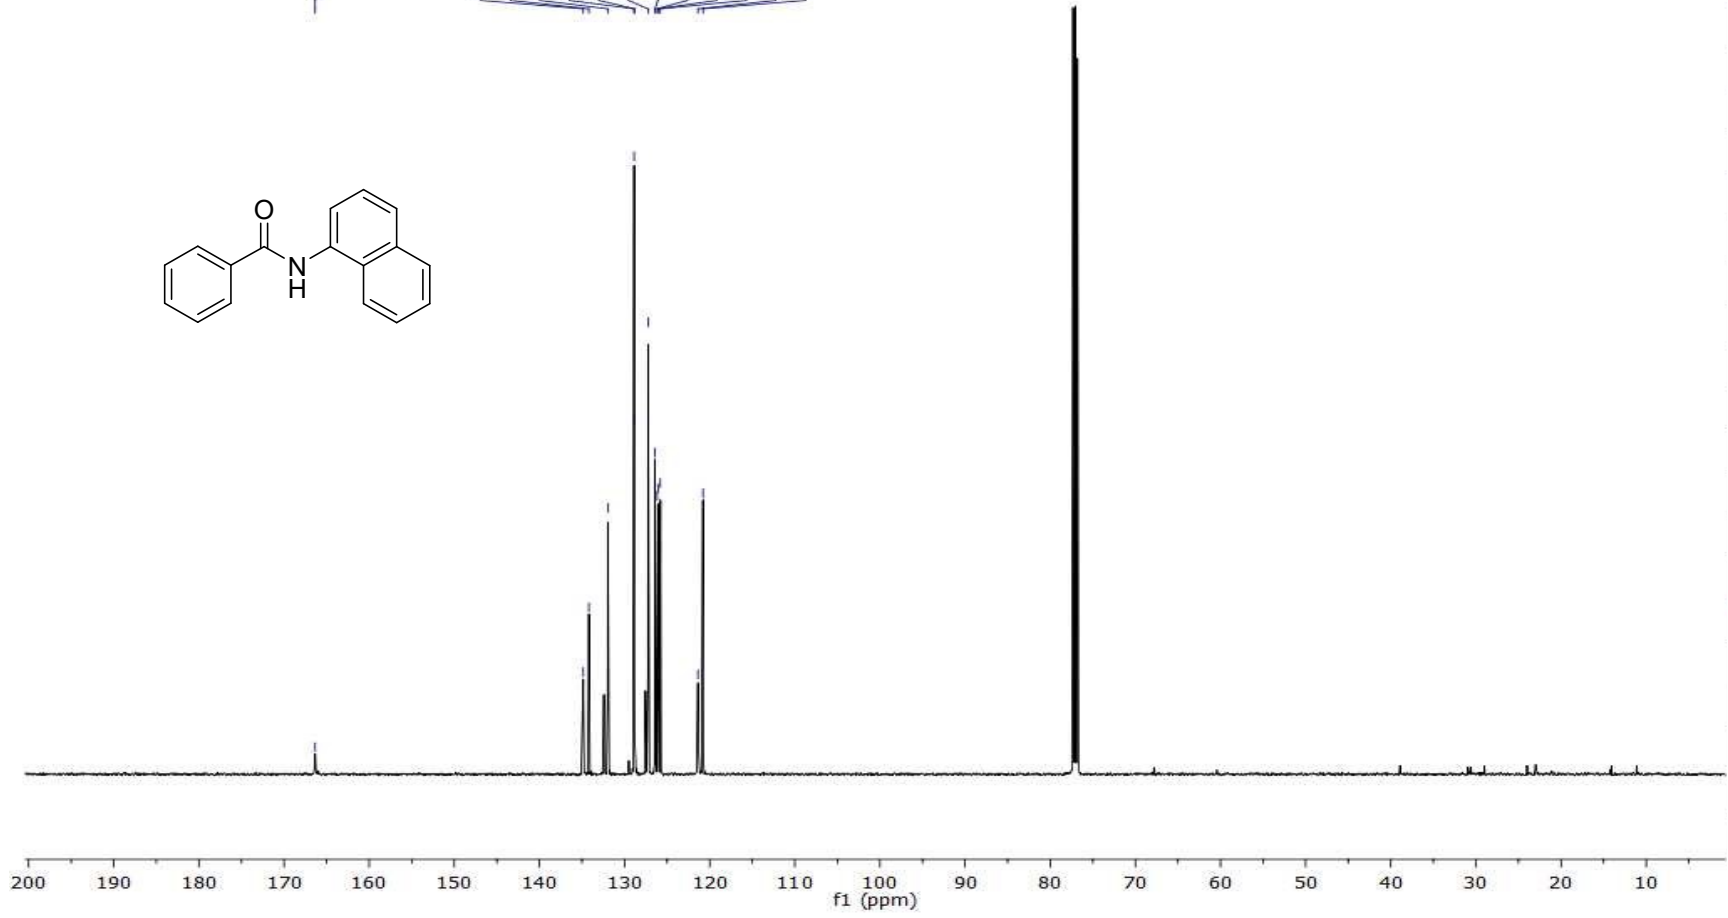



Abundance

Scan 1758 (12.265 min): IKA14 2.D\data.ms

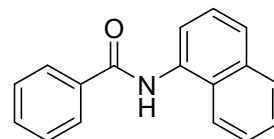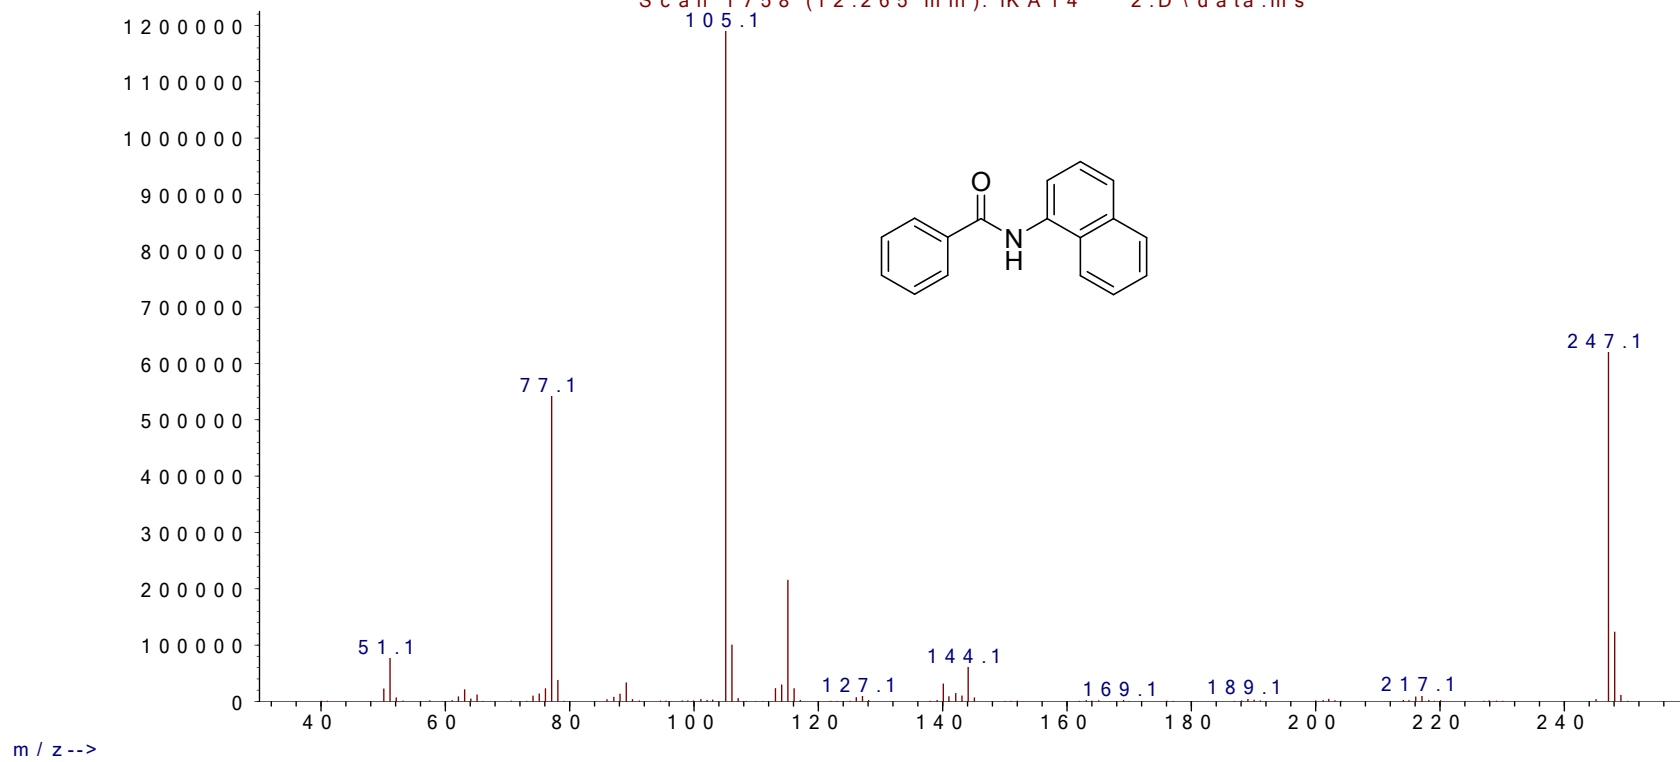

Abundance

Scan 1758 (12.265 min): IKA14 2.D\data.ms

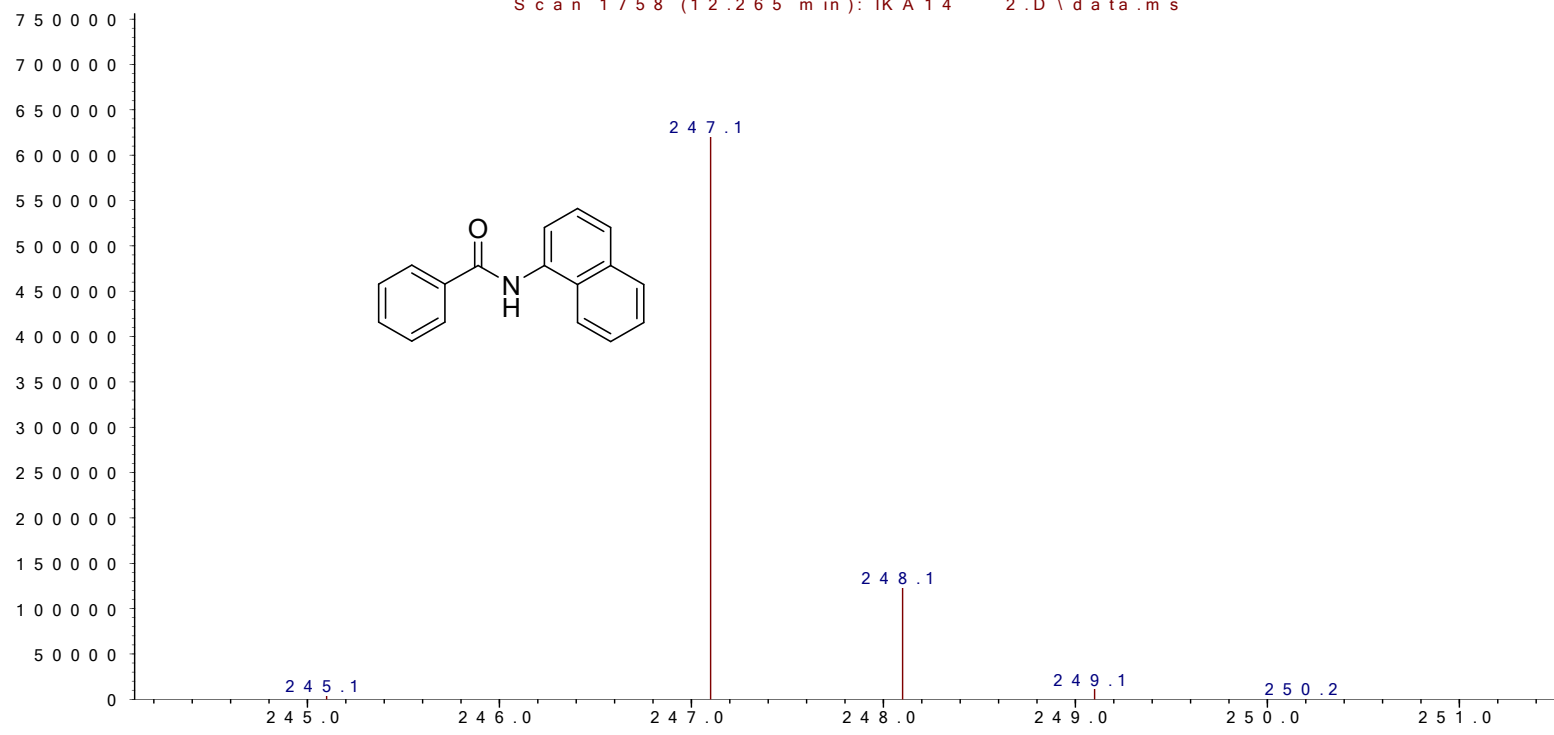

m / z-->

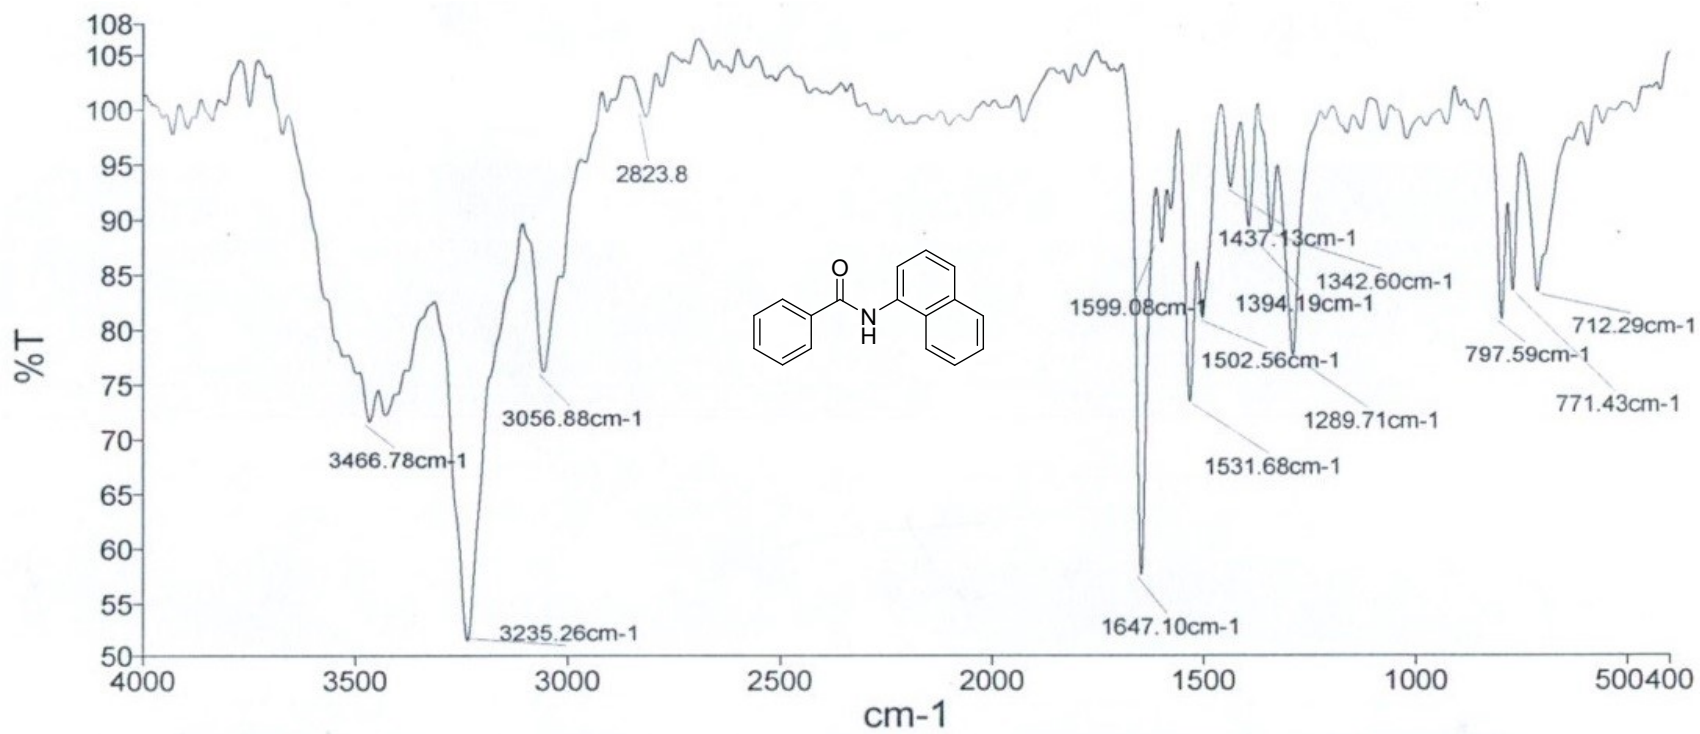

Supplement: d4na00151f1.pdf [file d4na00151f1.pdf]
